# Supplementary material for: Planar Elongated B12 Structure in M3B12 Clusters (M = Cu-Au)
Source: MDPI journal article supplement (doi:10.3390/molecules28010236), 2022-12-28
Supplement: s1 [file s1]

# Planar Elongated B<sub>12</sub> Structure in M<sub>3</sub>B<sub>12</sub> Clusters (M=Cu-Au)

José Solar-Encinas <sup>1</sup>, Alejandro Vásquez-Espinal <sup>2,\*</sup>, Luis Leyva-Parra <sup>1</sup>, Osvaldo Yáñez <sup>3</sup>, Diego Inostroza <sup>1</sup>, Maria Luisa Valenzuela <sup>4</sup>, Walter Orellana <sup>5</sup> and William Tiznado <sup>6,\*</sup>

<sup>1</sup> Programa de Doctorado en Fisicoquímica Molecular, Facultad de Ciencias Exactas, Universidad Andrés Bello, Av. República 275, Santiago 8370146, Chile

<sup>2</sup> Química y Farmacia, Facultad de Ciencias de la Salud, Universidad Arturo Prat, Casilla 121, Iquique 1100000, Chile

<sup>3</sup> Facultad de Ingeniería y Negocios, Universidad de las Américas, Santiago 7500000, Chile

<sup>4</sup> Grupo de Investigación en Energía y Procesos Sustentables, Instituto de Ciencias Químicas Aplicadas, Facultad de Ingeniería, Universidad Autónoma de Chile, Av. El Llano Subercaseaux 2801, Santiago 8900000, Chile

<sup>5</sup> Departamento de Ciencias Físicas, Universidad Andrés Bello, Santiago 8370136, Chile

<sup>6</sup> Computational and Theoretical Chemistry Group, Departamento de Ciencias Química, Facultad de Ciencias Exactas, Universidad Andrés Bello, Av. República 275, Santiago 8370146, Chile

\* Correspondence: alvasquez@unap.cl (A.V.-E.) and wtiznado@unab.cl (W.T.)

## SUPPORTING INFORMATION

**Figure S1.** Global minimum and low-lying isomers of  $\text{CuB}_{12}$ , their point group symmetries and spectroscopic states. Relative energies are shown in  $\text{kcal}\cdot\text{mol}^{-1}$  at PBE0-D3/def2-TZVP (**in bold**) level including zero-point energy (ZPE) corrections and DLPNO-CCSD(T)/CBS (**red parenthesis**). A number-letter label identifies structure to facilitate their connection with their Cartesian coordinates (at the end of the ESI).

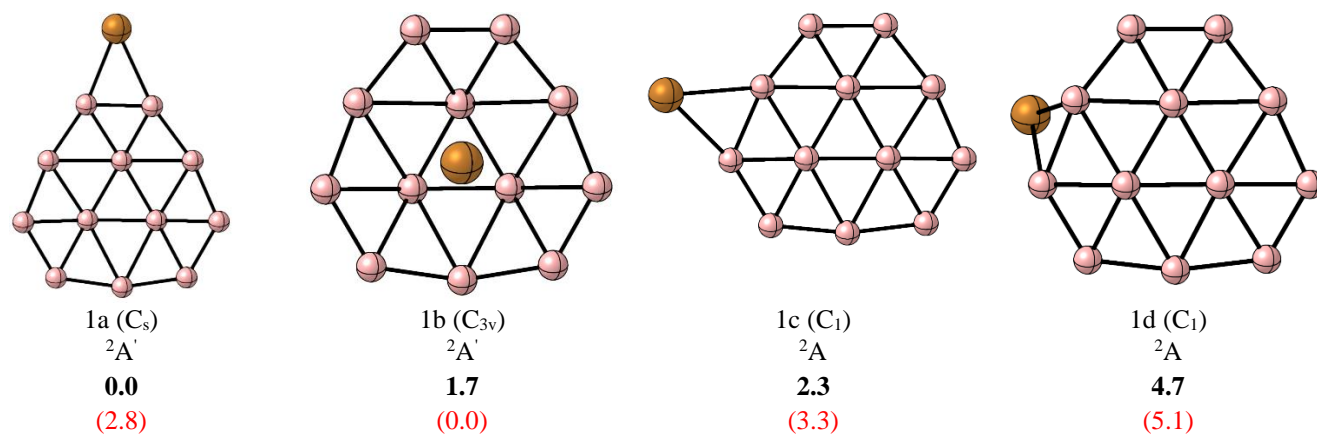

**Figure S2.** Global minimum and low-lying isomers of  $\text{AgB}_{12}$ , their point group symmetries and spectroscopic states. Relative energies are shown in  $\text{kcal}\cdot\text{mol}^{-1}$  at PBE0-D3/def2-TZVP (**in bold**) level including zero-point energy (ZPE) corrections and DLPNO-CCSD(T)/CBS (**red parenthesis**). A number-letter label identifies structure to facilitate their connection with their Cartesian coordinates (at the end of the ESI).

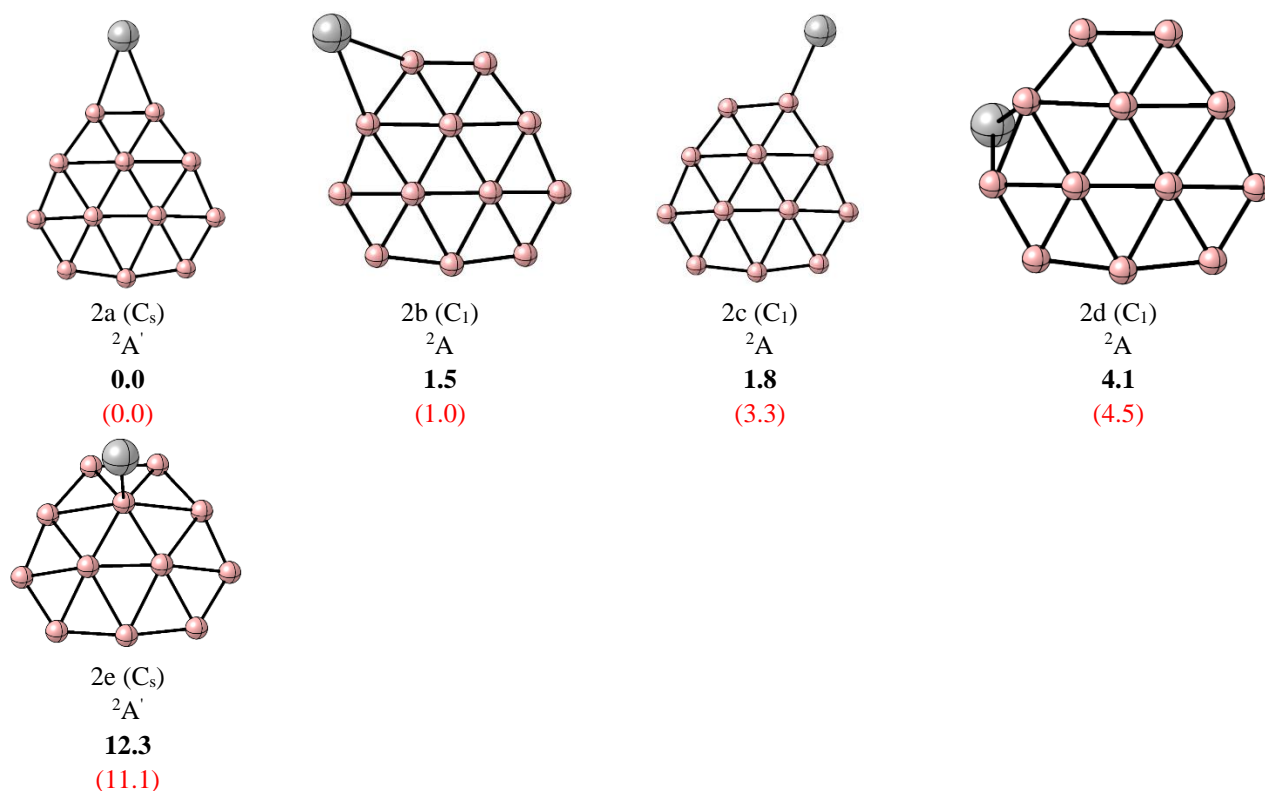

**Figure S3.** Global minimum and low-lying isomers of AuB<sub>12</sub>, their point group symmetries and spectroscopic states. Relative energies are shown in kcal·mol<sup>-1</sup> at PBE0-D3/def2-TZVP (**in bold**) level including zero-point energy (ZPE) corrections and DLPNO-CCSD(T)/CBS (**red parenthesis**). A number-letter label identifies structure to facilitate their connection with their Cartesian coordinates (at the end of the ESI).

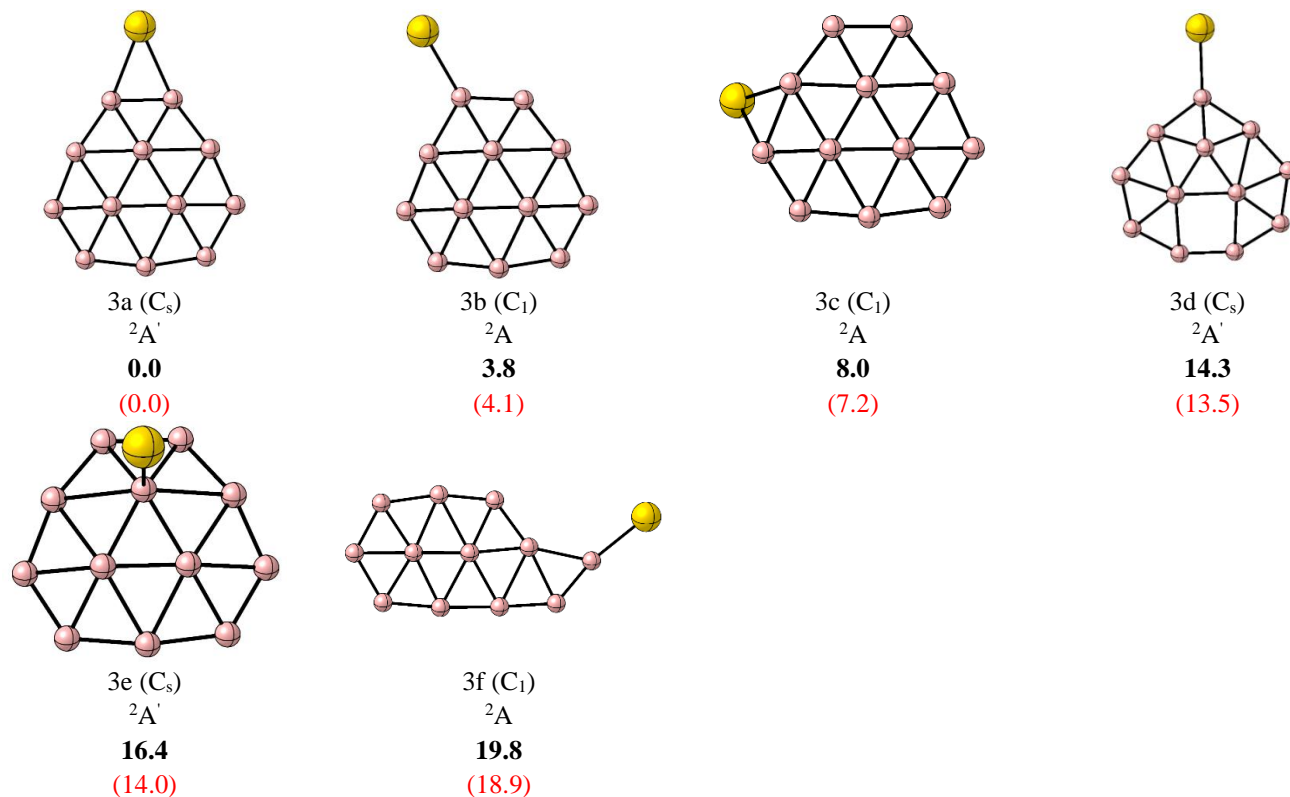

**Figure S4.** Global minimum and low-lying isomers of  $\text{Cu}_2\text{B}_{12}$ , their point group symmetries and spectroscopic states. Relative energies are shown in  $\text{kcal}\cdot\text{mol}^{-1}$  at PBE0-D3/def2-TZVP (**in bold**) level including zero-point energy (ZPE) corrections and DLPNO-CCSD(T)/CBS (**red parenthesis**). A number-letter label identifies structure to facilitate their connection with their Cartesian coordinates (at the end of the ESI).

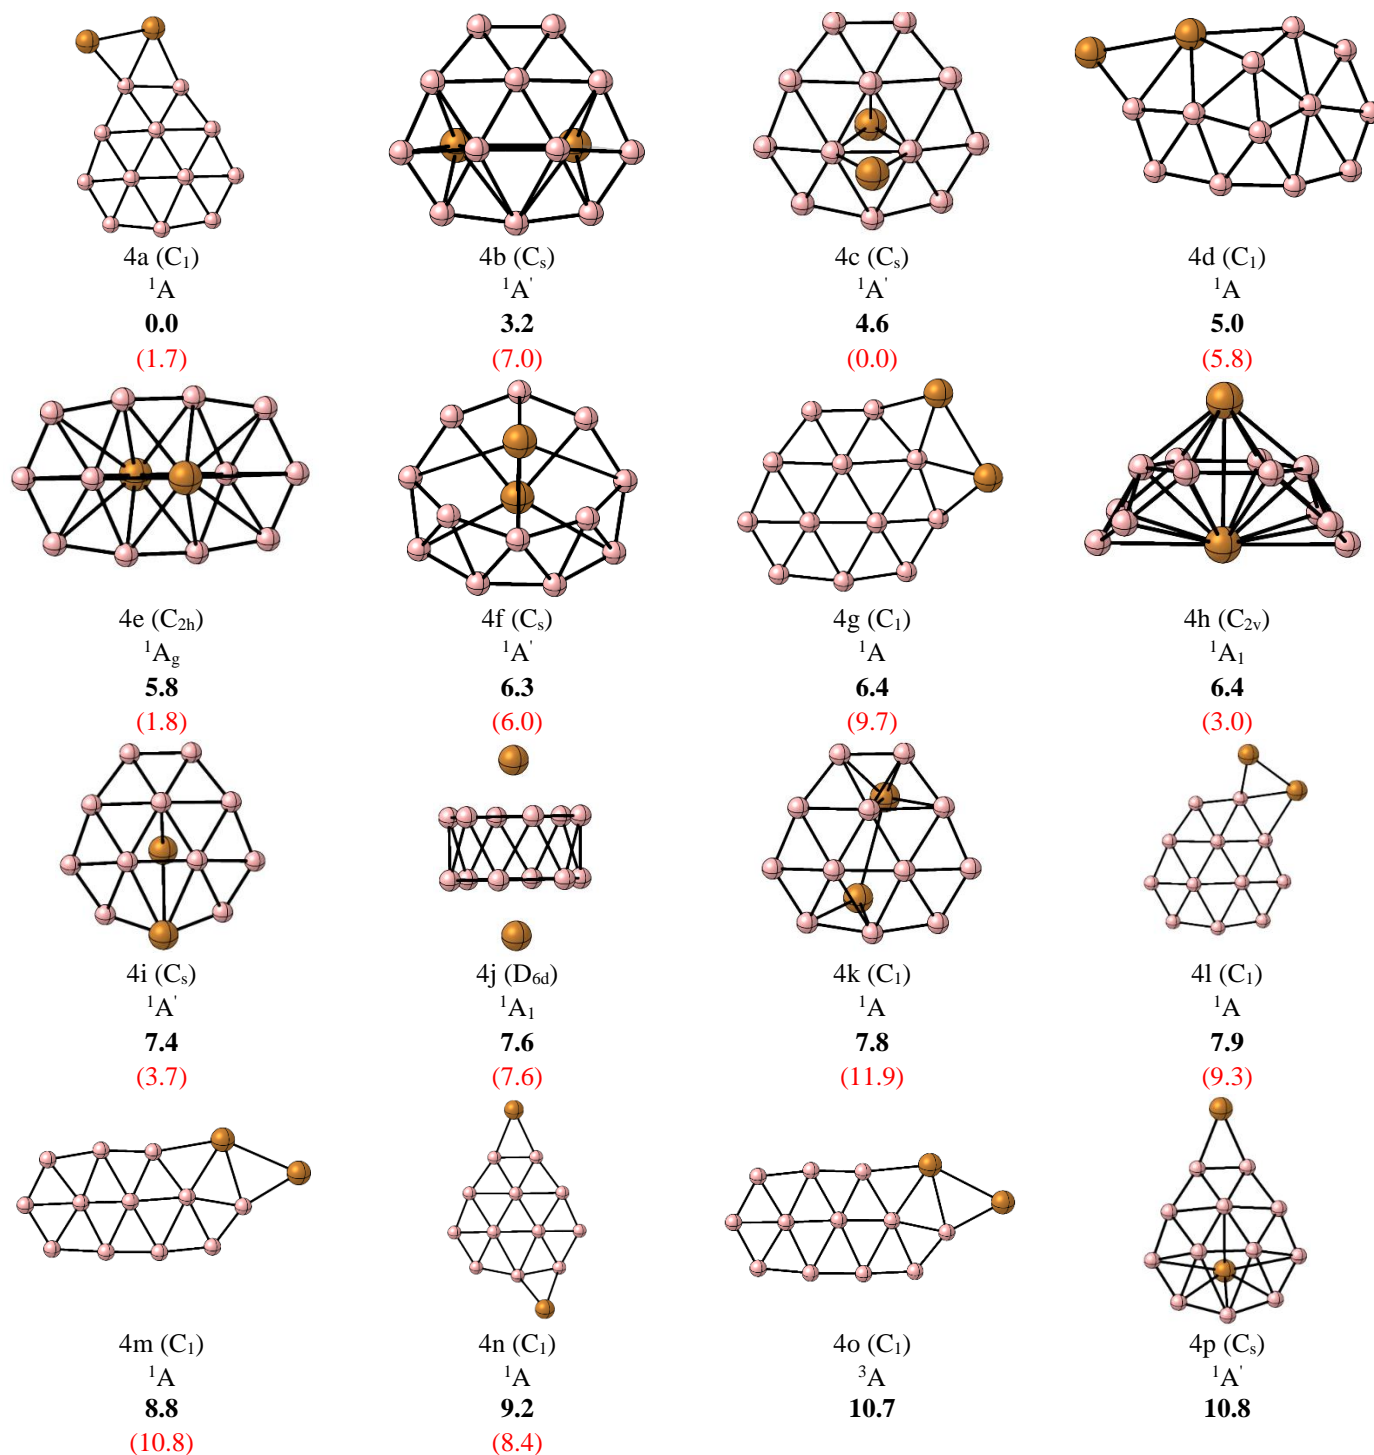

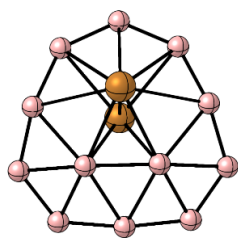

4q ( $C_s$ )  
 $^1A'$   
**11.1**

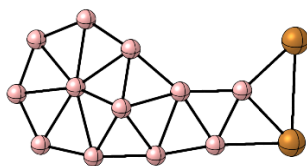

4r ( $C_1$ )  
 $^1A$   
**12.0**

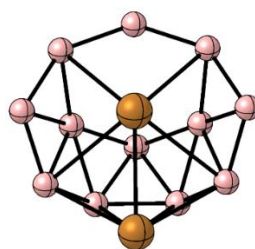

4s ( $C_s$ )  
 $^1A'$   
**13.3**

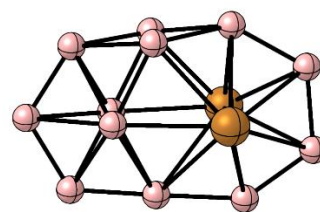

4t ( $C_s$ )  
 $^1A'$   
**14.1**

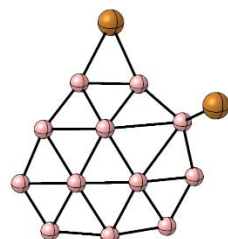

4u ( $C_1$ )  
 $^1A$   
**14.3**

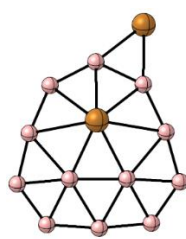

4v ( $C_1$ )  
 $^1A$   
**15.4**

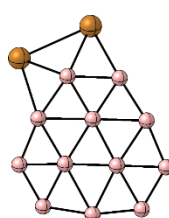

4w ( $C_1$ )  
 $^3A$   
**15.5**

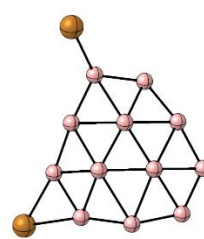

4x ( $C_1$ )  
 $^1A$   
**16.1**

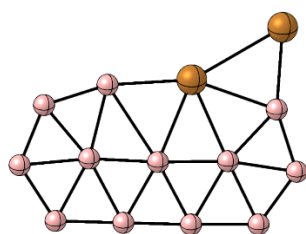

4y ( $C_s$ )  
 $^1A'$   
**17.8**

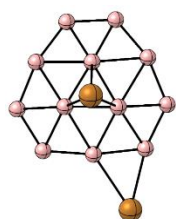

4z ( $C_1$ )  
 $^1A$   
**18.6**

**Figure S5.** Global minimum and low-lying isomers of  $\text{Ag}_2\text{B}_{12}$ , their point group symmetries and spectroscopic states. Relative energies are shown in  $\text{kcal}\cdot\text{mol}^{-1}$  at PBE0-D3/def2-TZVP (**in bold**) level including zero-point energy (ZPE) corrections and DLPNO-CCSD(T)/CBS (**red parenthesis**). A number-letter label identifies structure to facilitate their connection with their Cartesian coordinates (at the end of the ESI).

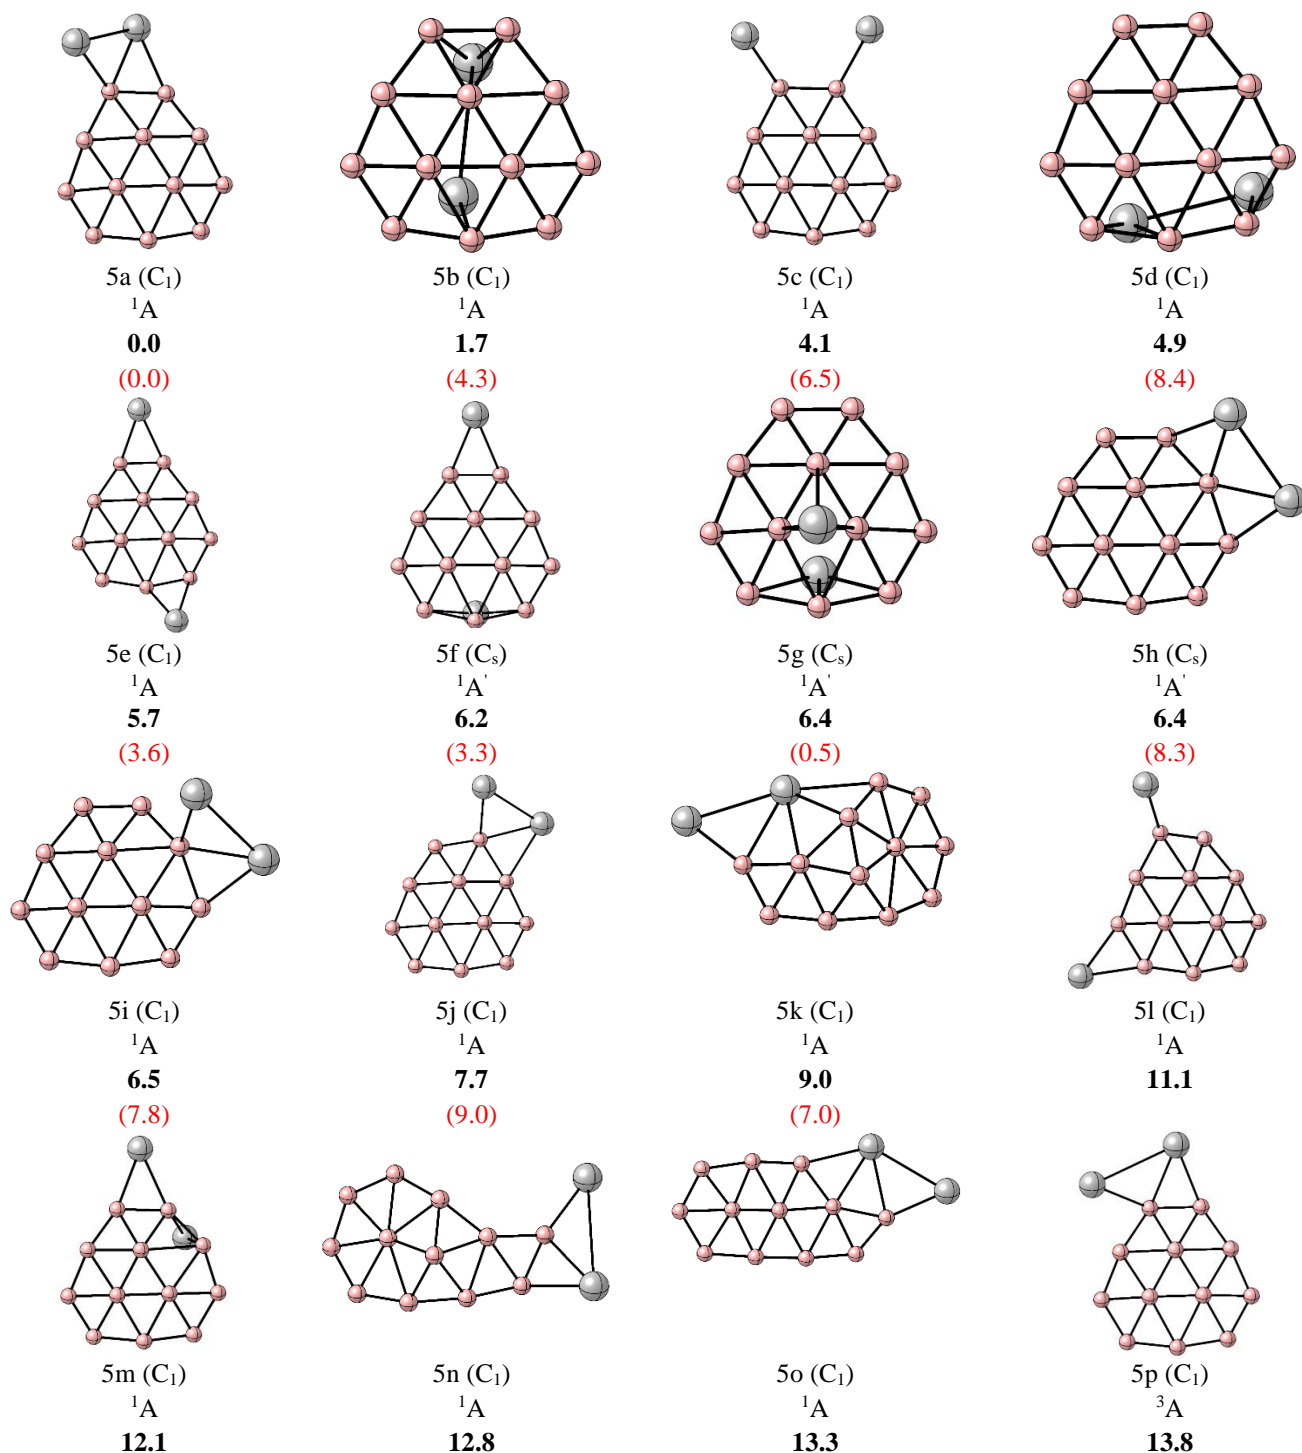

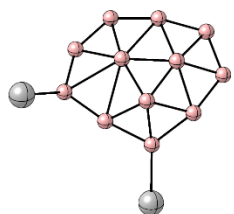

5q ( $C_1$ )  
 $^1A$   
**14.2**

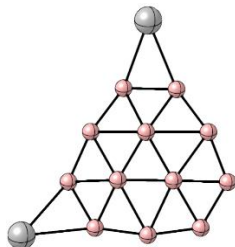

5r ( $C_1$ )  
 $^3A$   
**14.3**

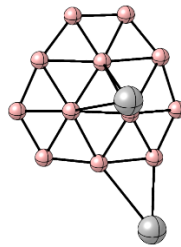

5s ( $C_1$ )  
 $^1A$   
**14.5**

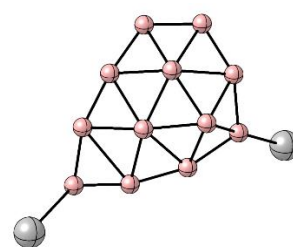

5t ( $C_1$ )  
 $^1A$   
**15.2**

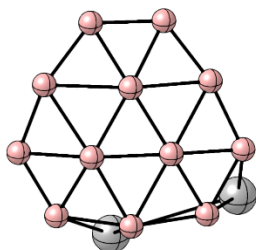

5u ( $C_1$ )  
 $^3A$   
**15.7**

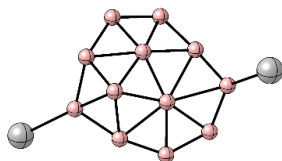

5v ( $C_1$ )  
 $^1A$   
**16.3**

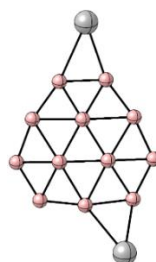

5w ( $C_1$ )  
 $^3A$   
**16.7**

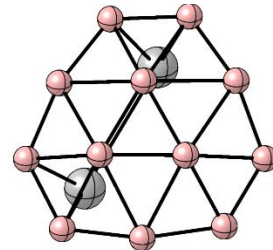

5x ( $C_s$ )  
 $^3A'$   
**17.3**

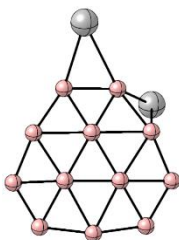

5y ( $C_1$ )  
 $^3A$   
**18.0**

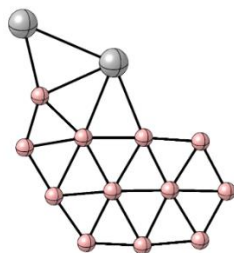

5z ( $C_s$ )  
 $^3A'$   
**18.3**

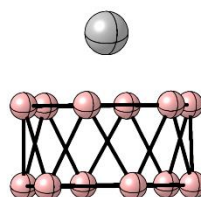

5a'' ( $D_{6d}$ )  
 $^1A_1$   
**54.7**



**Figure S6.** Global minimum and low-lying isomers of Au<sub>2</sub>B<sub>12</sub>, their point group symmetries and spectroscopic states. Relative energies are shown in kcal·mol<sup>-1</sup> at PBE0-D3/def2-TZVP (**in bold**) level including zero-point energy (ZPE) corrections and DLPNO-CCSD(T)/CBS (**red parenthesis**). A number-letter label identifies structure to facilitate their connection with their Cartesian coordinates (at the end of the ESI).

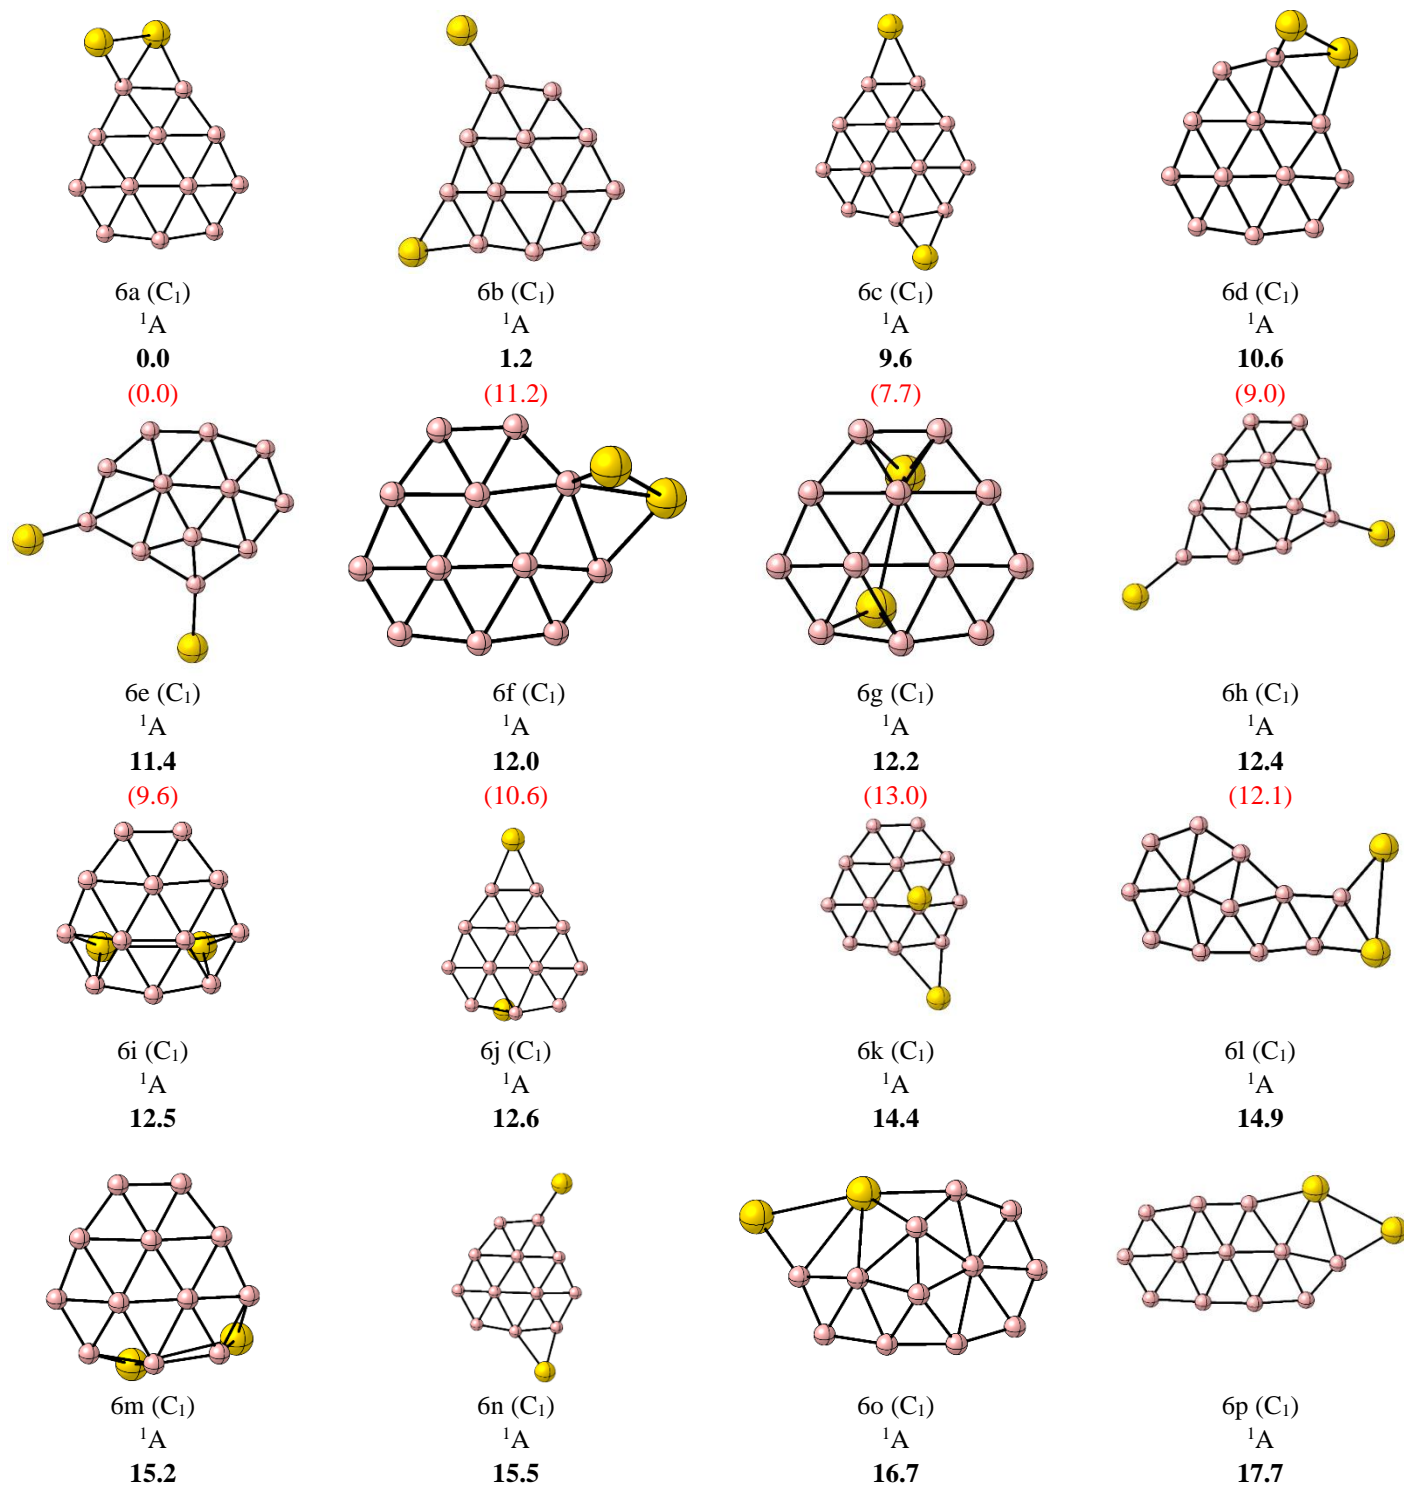

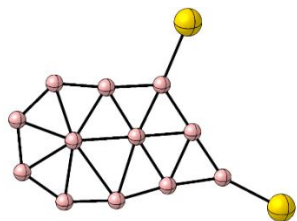

6q ( $C_s$ )  
 $^1A'$   
**17.8**

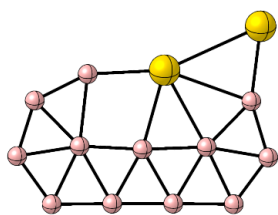

6r ( $C_s$ )  
 $^1A'$   
**18.3**

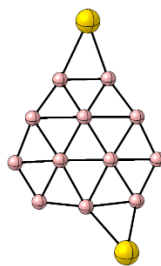

6s ( $C_1$ )  
 $^3A$   
**19.8**

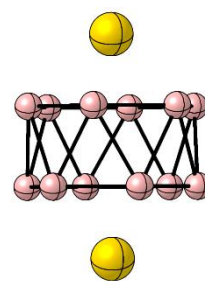

6t ( $D_{6d}$ )  
 $^1A_1$   
**102.6**

**Figures S7.** Global minimum and low-lying isomers of  $\text{Cu}_3\text{B}_{12}$ , their point group symmetries and spectroscopic states. Relative energies are shown in  $\text{kcal}\cdot\text{mol}^{-1}$  at PBE0-D3/def2-TZVP (**in bold**) level including zero-point energy (ZPE) corrections and DLPNO-CCSD(T)/CBS (**red parenthesis**). A number-letter label identifies structure to facilitate their connection with their Cartesian coordinates (at the end of the ESI).

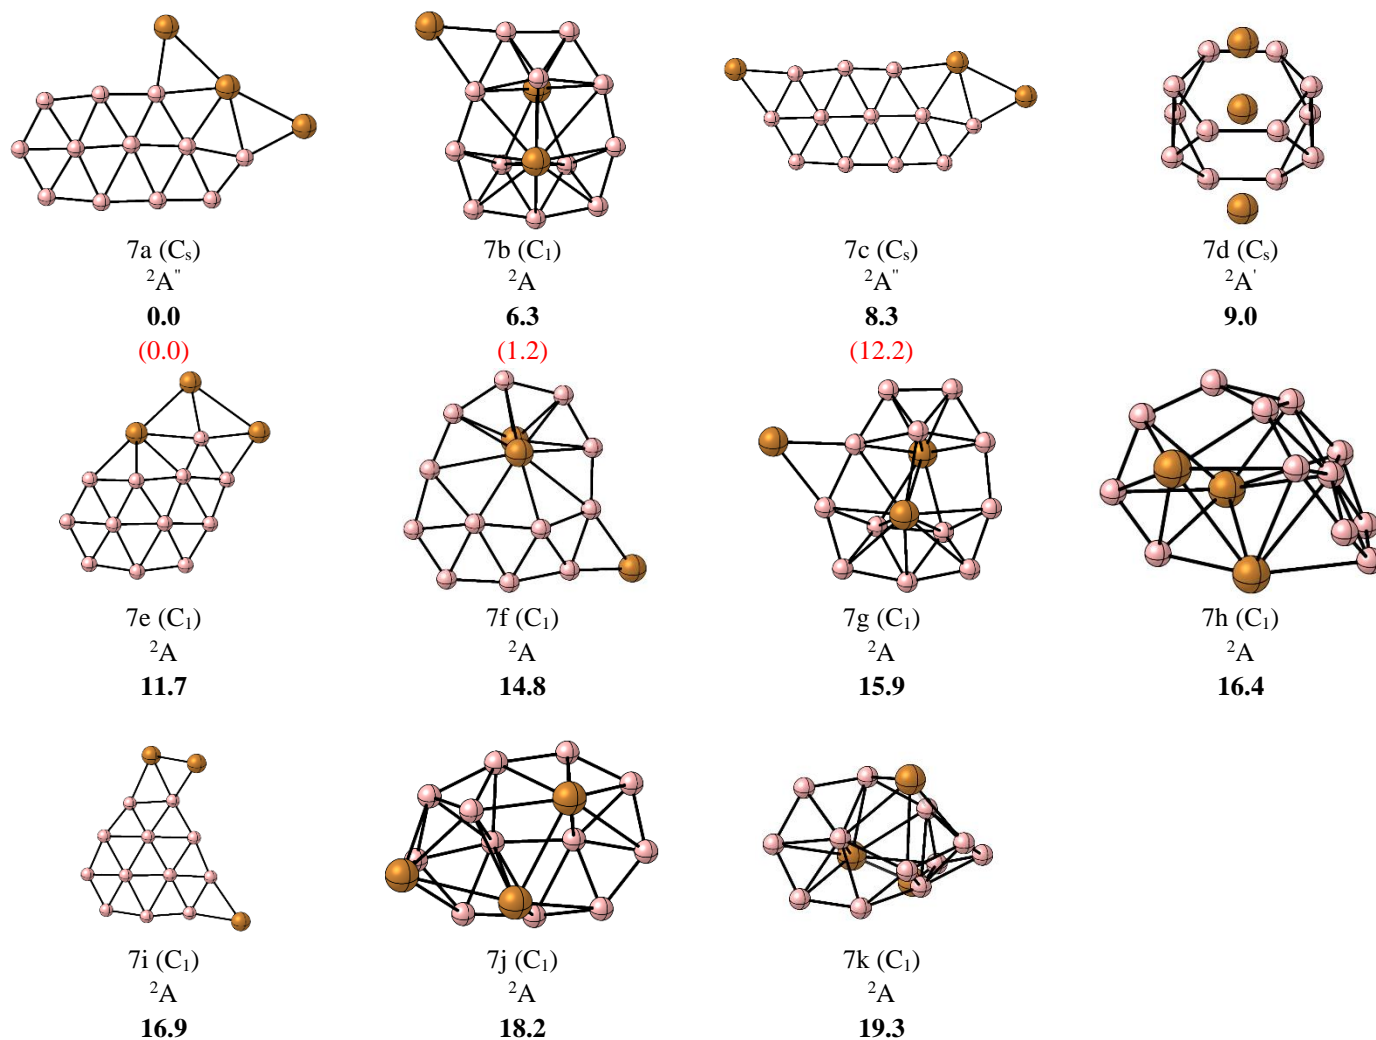

**Figure S8.** Global minimum and low-lying isomers of  $\text{Ag}_3\text{B}_{12}$ , their point group symmetries and spectroscopic states. Relative energies are shown in  $\text{kcal}\cdot\text{mol}^{-1}$  at PBE0-D3/def2-TZVP (**in bold**) level including zero-point energy (ZPE) corrections and DLPNO-CCSD(T)/CBS (**red parenthesis**). A number-letter label identifies structure to facilitate their connection with their Cartesian coordinates (at the end of the ESI).

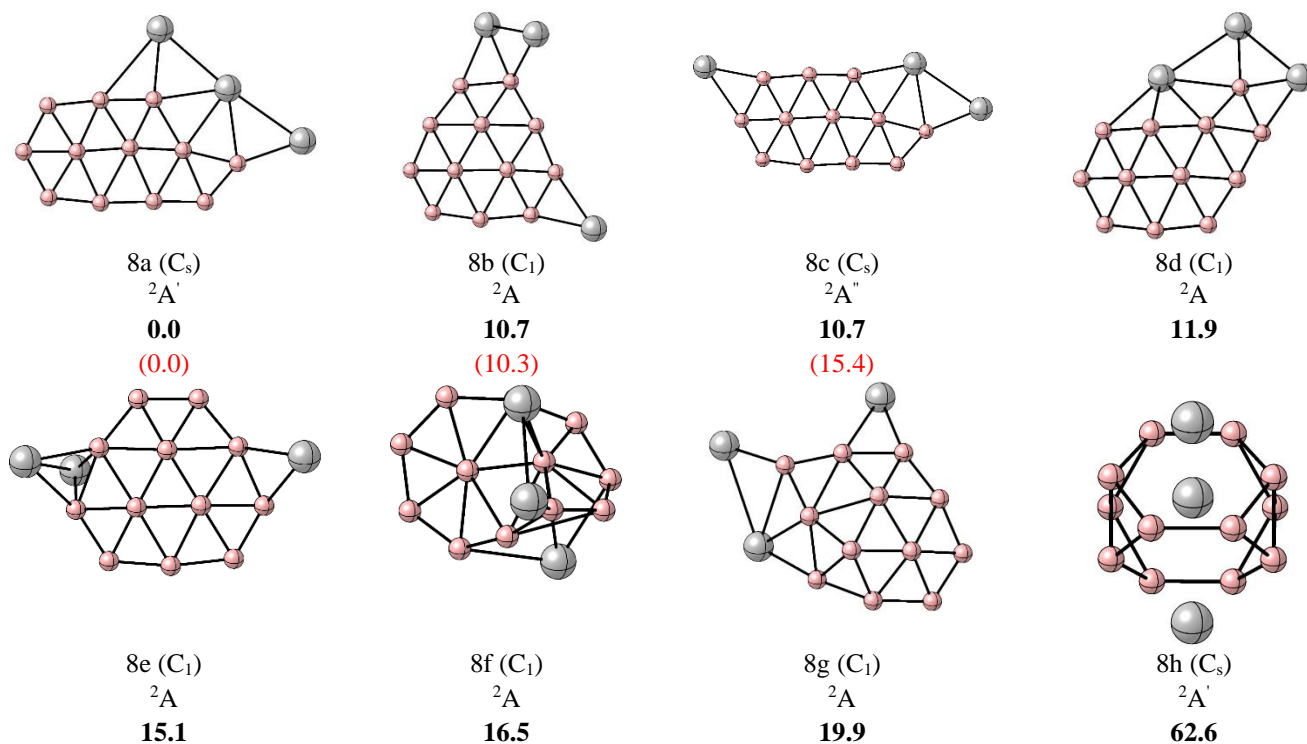

**Figure S9.** Global minimum and low-lying isomers of  $\text{Au}_3\text{B}_{12}$ , their point group symmetries and spectroscopic states. Relative energies are shown in  $\text{kcal}\cdot\text{mol}^{-1}$  at PBE0-D3/def2-TZVP (**in bold**) level including zero-point energy (ZPE) corrections and DLPNO-CCSD(T)/CBS (**red parenthesis**). A number-letter label identifies structure to facilitate their connection with their Cartesian coordinates (at the end of the ESI).

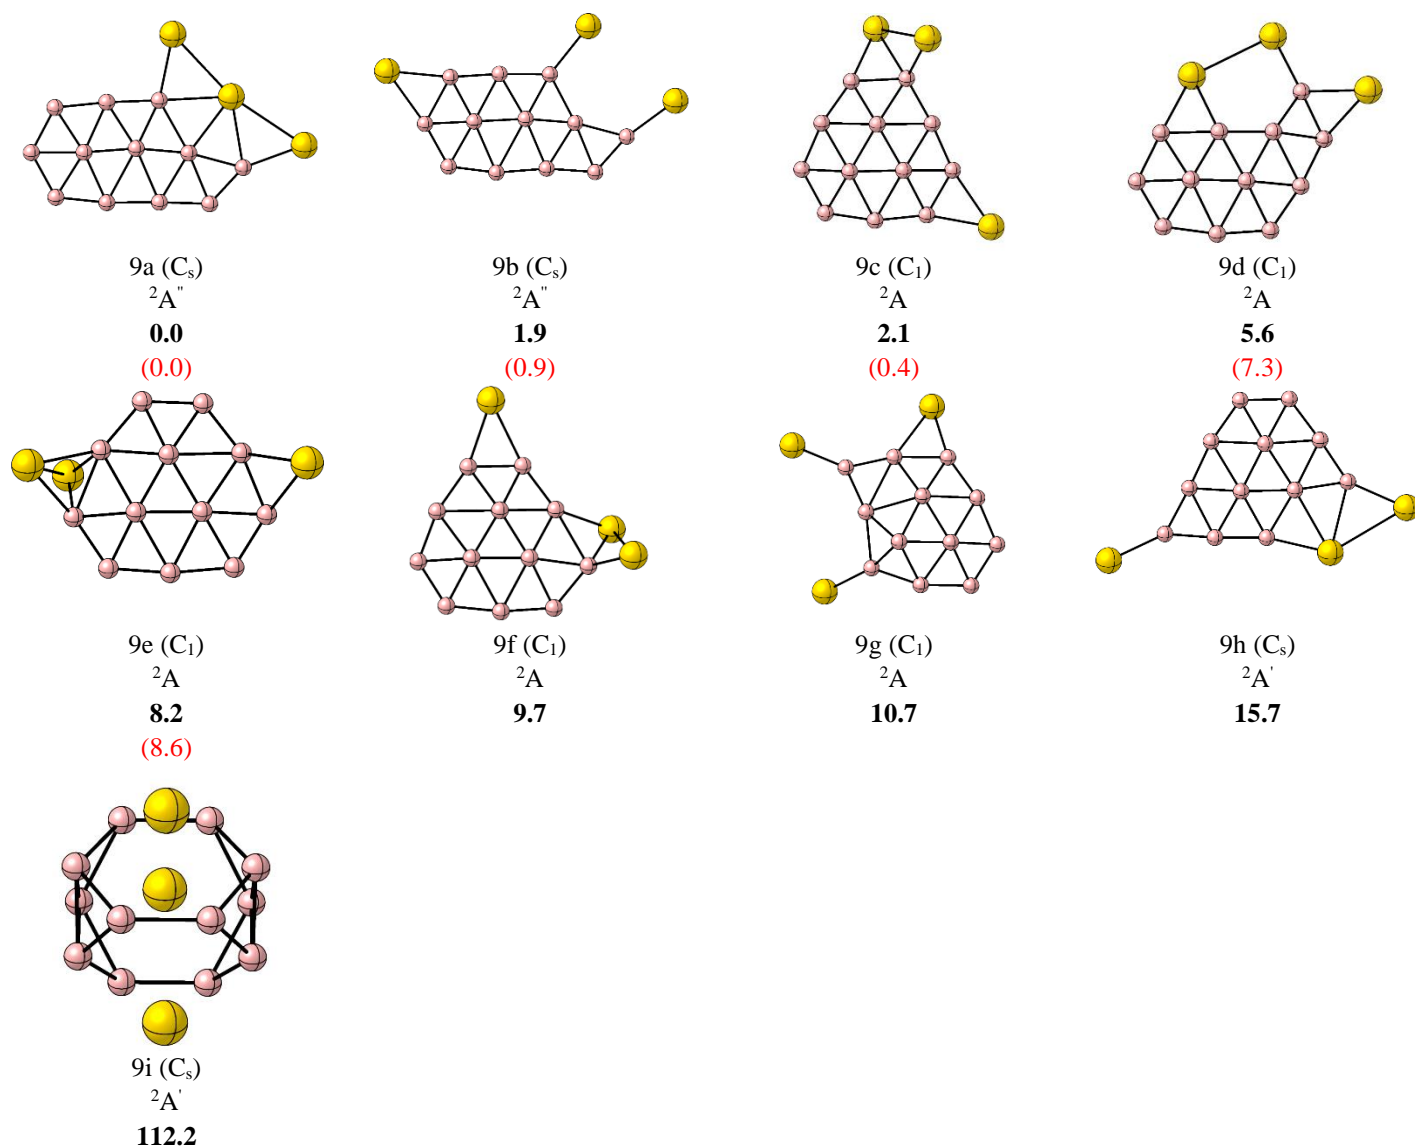

**Figure S10.** Bond lengths ( $r$ , Å), **natural charges** ( $q$ ,  $|e|$ ), and **Wiberg bond indices** (WBI) of the  $\text{CuB}_{12}$ ,  $\text{AgB}_{12}$  and  $\text{AuB}_{12}$  GMs at the PBE0-D3/def2-TZVP level.

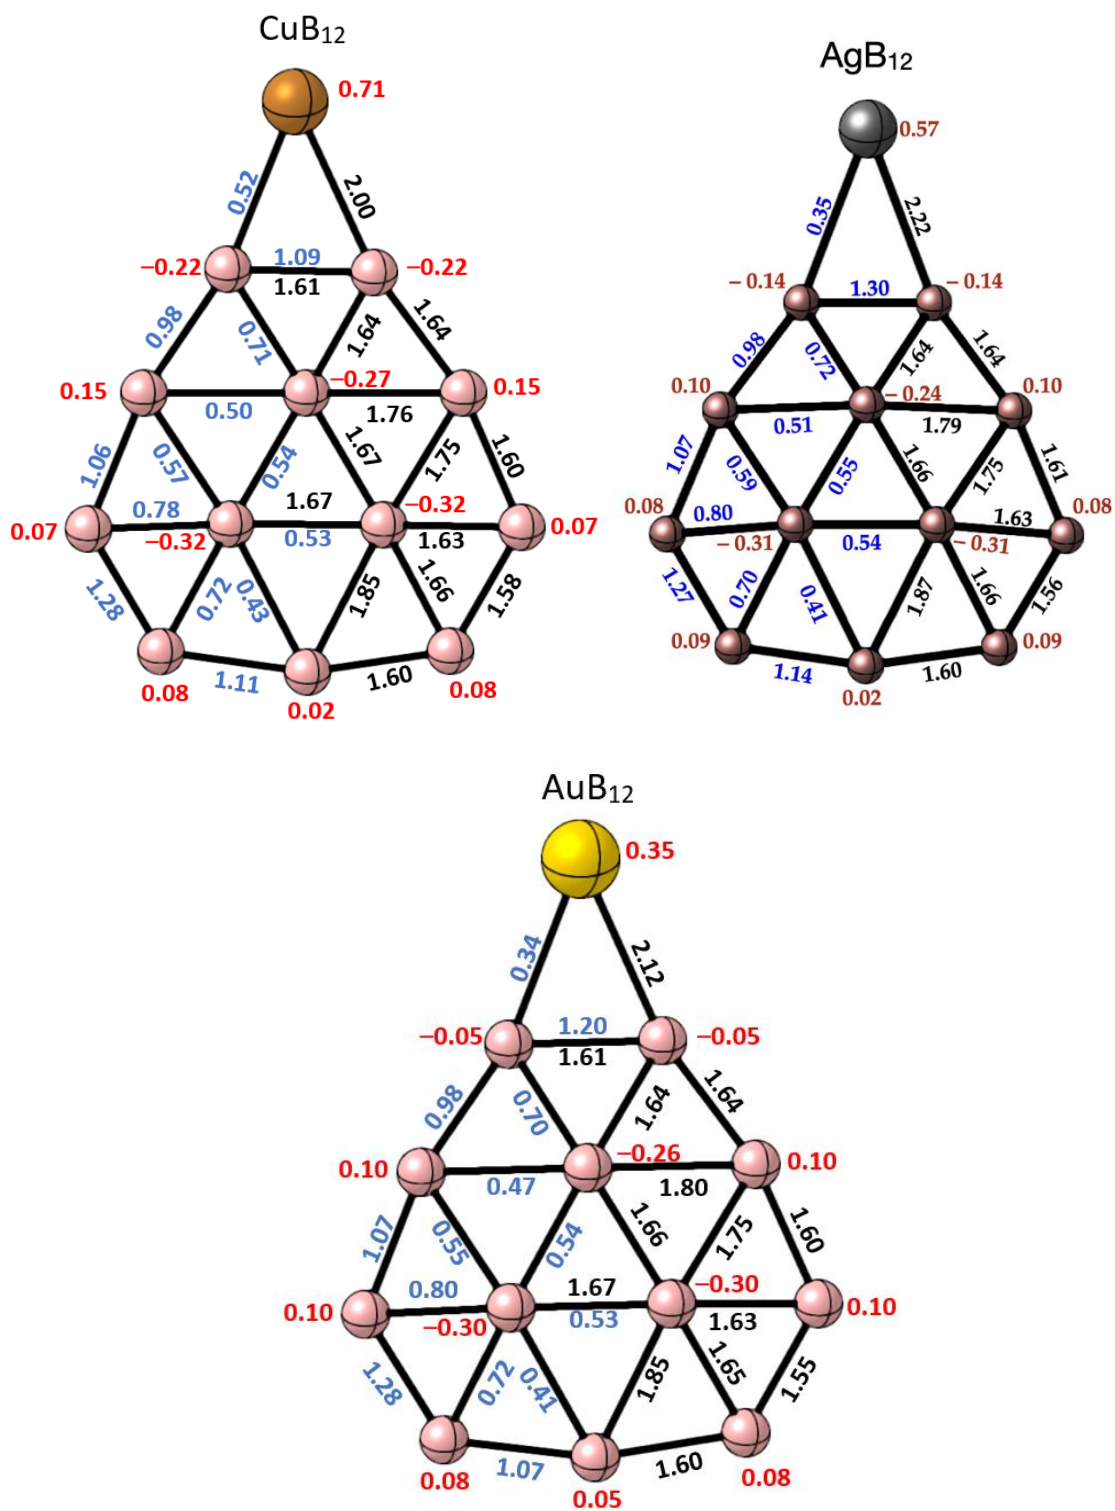



**Figure S11.** Bond lengths ( $r$ , Å), **natural charges** ( $q$ , |e|), and **Wiberg bond indices** (WBI) of the  $\text{Cu}_2\text{B}_{12}$ ,  $\text{Ag}_2\text{B}_{12}$  and  $\text{Au}_2\text{B}_{12}$  GMs at the PBE0-D3/def2-TZVP level.

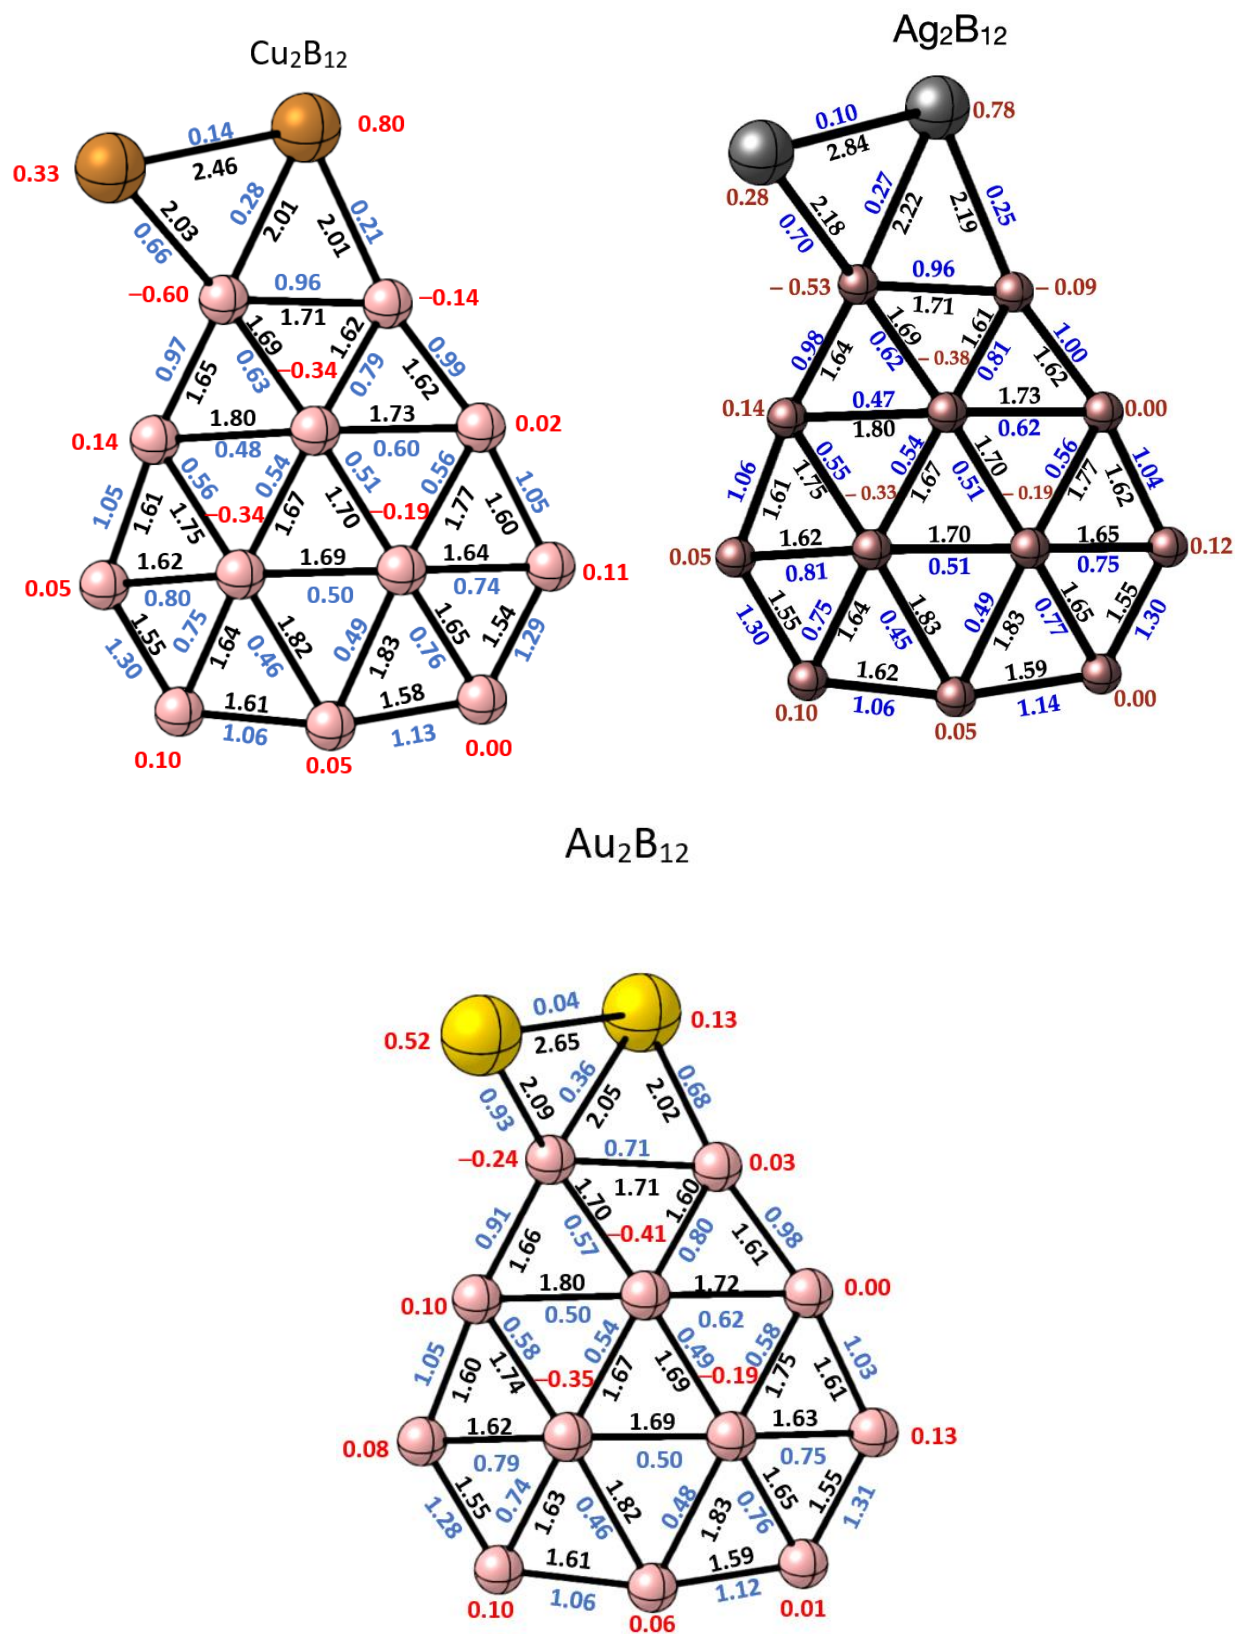

**Figure S12.** Bond lengths ( $r$ , Å), **natural charges** ( $q$ ,  $|e|$ ), and **Wiberg bond indices** (WBI) of the  $\text{Cu}_3\text{B}_{12}$ ,  $\text{Ag}_3\text{B}_{12}$  and  $\text{Au}_3\text{B}_{12}$  GMs at the PBE0-D3/def2-TZVP level.

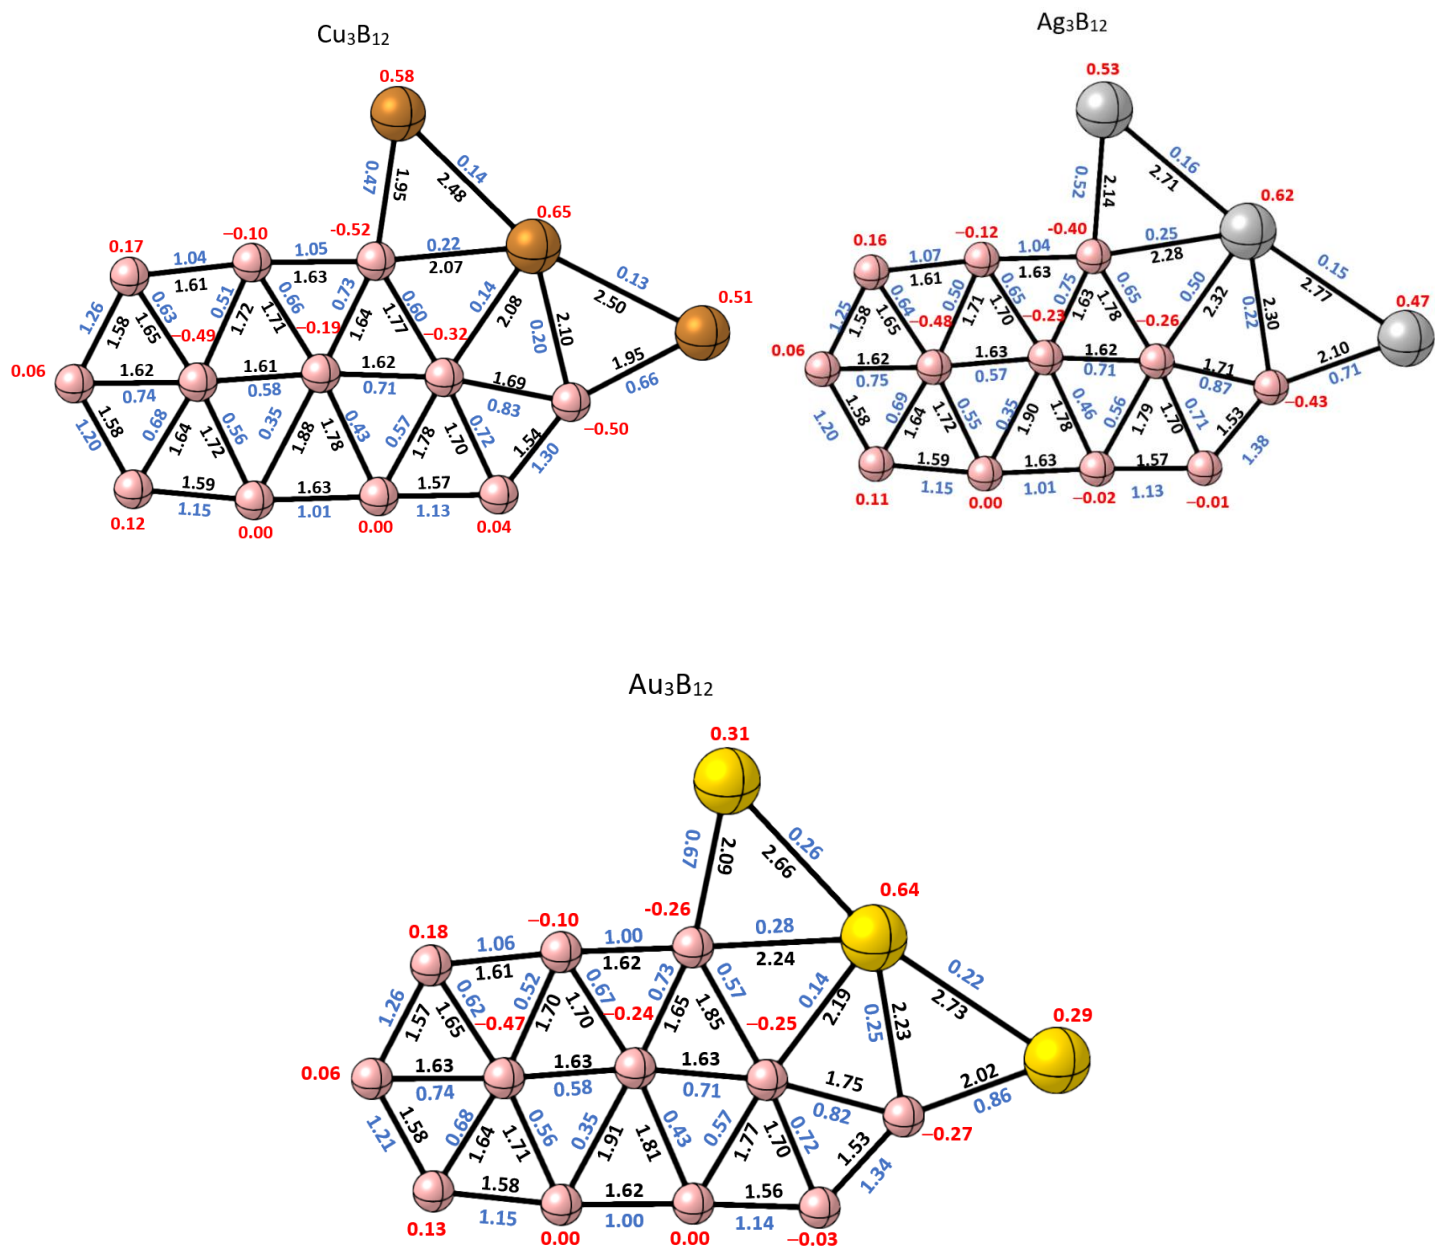



**Figure S13.** The AdNDP bonding pattern of the  $\text{CuB}_{12}$ ,  $\text{AgB}_{12}$  and  $\text{AuB}_{12}$  GMs at the PBE0-D3/def2-TZVP level.

|                                                                                    |                     |                 |
|------------------------------------------------------------------------------------|---------------------|-----------------|
| 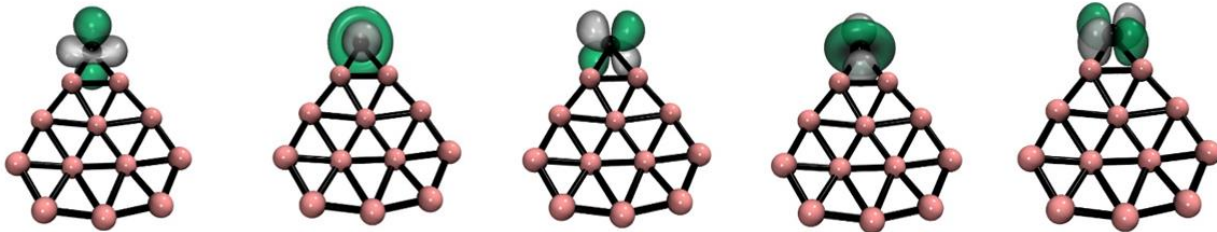 |                     | 5 x 1c-2e M LPs |
| <b>M = Cu</b>                                                                      | ON = 1.99 – 1.90  e |                 |
| <b>M = Ag</b>                                                                      | ON = 1.99 – 1.90  e |                 |
| <b>M = Au</b>                                                                      | ON = 1.99 – 1.80  e |                 |

|                                                                                    |                     |                           |                           |                          |
|------------------------------------------------------------------------------------|---------------------|---------------------------|---------------------------|--------------------------|
|  |                     | 9 x 2c-2e $\sigma$ -bonds | 6 x 3c-2e $\sigma$ -bonds | 1 x 3c-1e $\sigma$ -bond |
| <b>M = Cu</b>                                                                      | ON = 1.93 - 1.80  e | ON = 1.90 – 1.79  e       | ON = 0.89  e              |                          |
| <b>M = Ag</b>                                                                      | ON = 1.93 - 1.81  e | ON = 1.91 – 1.79  e       | ON = 0.91  e              |                          |
| <b>M = Au</b>                                                                      | ON = 1.93 - 1.71  e | ON = 1.90 – 1.79  e       | ON = 0.95  e              |                          |

|                                                                                      |                     |                        |
|--------------------------------------------------------------------------------------|---------------------|------------------------|
|  |                     | 3 x 5c-2e $\pi$ -bonds |
| <b>M = Cu</b>                                                                        | ON = 1.88 – 1.85  e |                        |
| <b>M = Ag</b>                                                                        | ON = 1.85 – 1.71  e |                        |
| <b>M = Au</b>                                                                        | ON = 1.86 – 1.78  e |                        |

**Figure S14.** The AdNDP bonding pattern of the  $\text{Cu}_2\text{B}_{12}$ ,  $\text{Ag}_2\text{B}_{12}$  and  $\text{Au}_2\text{B}_{12}$  GMs at the PBE0-D3/def2-TZVP level.

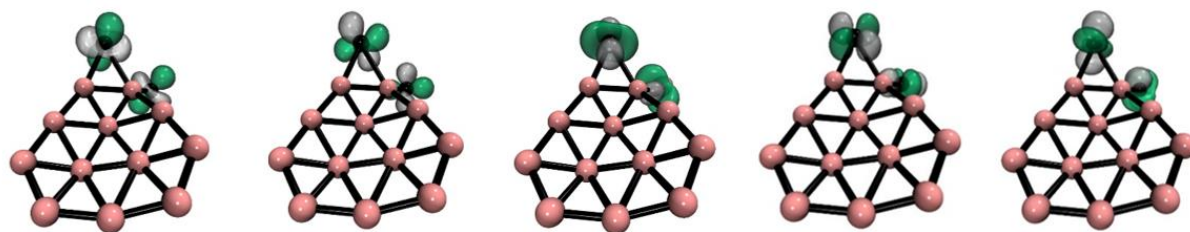

10 x 1c-2e MLPs

|               |                     |
|---------------|---------------------|
| <b>M = Cu</b> | ON = 1.99 – 1.92  e |
| <b>M = Ag</b> | ON = 1.99 – 1.90  e |
| <b>M = Au</b> | ON = 1.99 – 1.87  e |

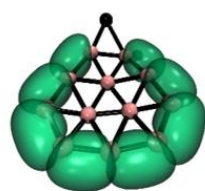

8 x 2c-2e  $\sigma$ -bonds

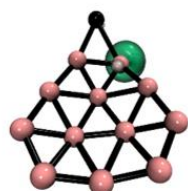

1 x 2c-2e  $\sigma$ -bond

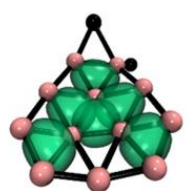

6 x 3c-2e  $\sigma$ -bonds

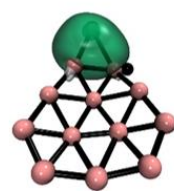

1 x 3c-2e  $\sigma$ -bond

|               |                     |              |                     |              |
|---------------|---------------------|--------------|---------------------|--------------|
| <b>M = Cu</b> | ON = 1.93 – 1.86  e | ON = 1.78  e | ON = 1.93 – 1.81  e | ON = 1.90  e |
| <b>M = Ag</b> | ON = 1.93 – 1.86  e | ON = 1.80  e | ON = 1.89 – 1.81  e | ON = 1.92  e |
| <b>M = Au</b> | ON = 1.93 – 1.87  e | ON = 1.93  e | ON = 1.95 – 1.80  e | ON = 1.95  e |

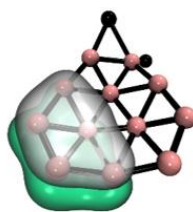

3 x 5c-2e  $\pi$ -bonds

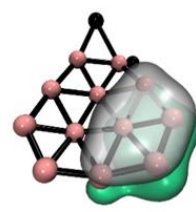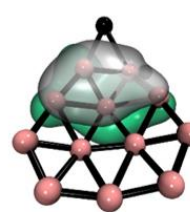

|               |                     |
|---------------|---------------------|
| <b>M = Cu</b> | ON = 1.89 – 1.76  e |
| <b>M = Ag</b> | ON = 1.88 – 1.78  e |
| <b>M = Au</b> | ON = 1.88 – 1.74  e |

**Figure S15.** The AdNDP bonding pattern of the  $\text{Cu}_3\text{B}_{12}$ ,  $\text{Ag}_3\text{B}_{12}$  and  $\text{Au}_3\text{B}_{12}$  GMs at the PBE0-D3/def2-TZVP level.

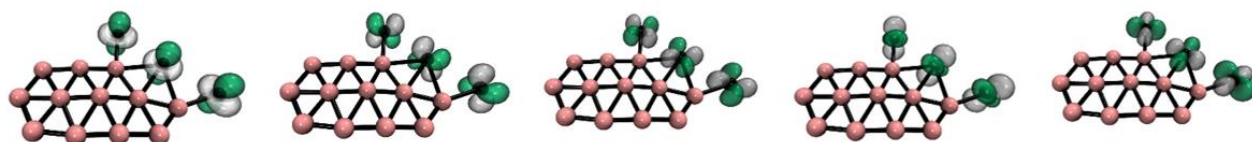

15 x 1c-2e MLPs

|               |                     |
|---------------|---------------------|
| <b>M = Cu</b> | ON = 1.99 – 1.93  e |
| <b>M = Ag</b> | ON = 1.99 – 1.93  e |
| <b>M = Au</b> | ON = 1.99 – 1.87  e |

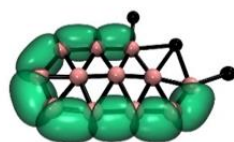

8 x 2c-2e  $\sigma$ -bonds

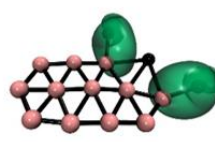

2 x 2c-2e  $\sigma$ -bonds

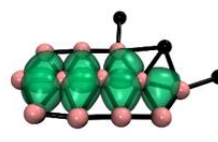

7 x 3c-2e  $\sigma$ -bonds

|               |                     |                     |                     |
|---------------|---------------------|---------------------|---------------------|
| <b>M = Cu</b> | ON = 1.94 – 1.82  e | ON = 1.79 – 1.76  e | ON = 1.94 – 1.78  e |
| <b>M = Ag</b> | ON = 1.94 – 1.71  e | ON = 1.79 – 1.77  e | ON = 1.94 – 1.78  e |
| <b>M = Au</b> | ON = 1.94 – 1.70  e | ON = 1.82 – 1.71  e | ON = 1.91 – 1.77  e |

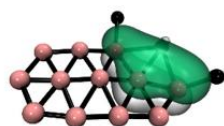

1 x 4c-1e  $\pi$ -bond

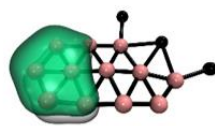

2 x 5c-2e  $\pi$ -bonds

|               |              |                     |
|---------------|--------------|---------------------|
| <b>M = Cu</b> | ON = 0.88  e | ON = 1.91 – 1.89  e |
| <b>M = Ag</b> | ON = 0.92  e | ON = 1.93 – 1.92  e |
| <b>M = Au</b> | ON = 0.98  e | ON = 1.93 – 1.92  e |

**Figure S16.** Energy cycle for the isomerization between the GM (top) and the higher energy isomer (bottom) of  $M_3B_{12}$  ( $M = Cu, Ag, Au$ ) used in IEDA computations.

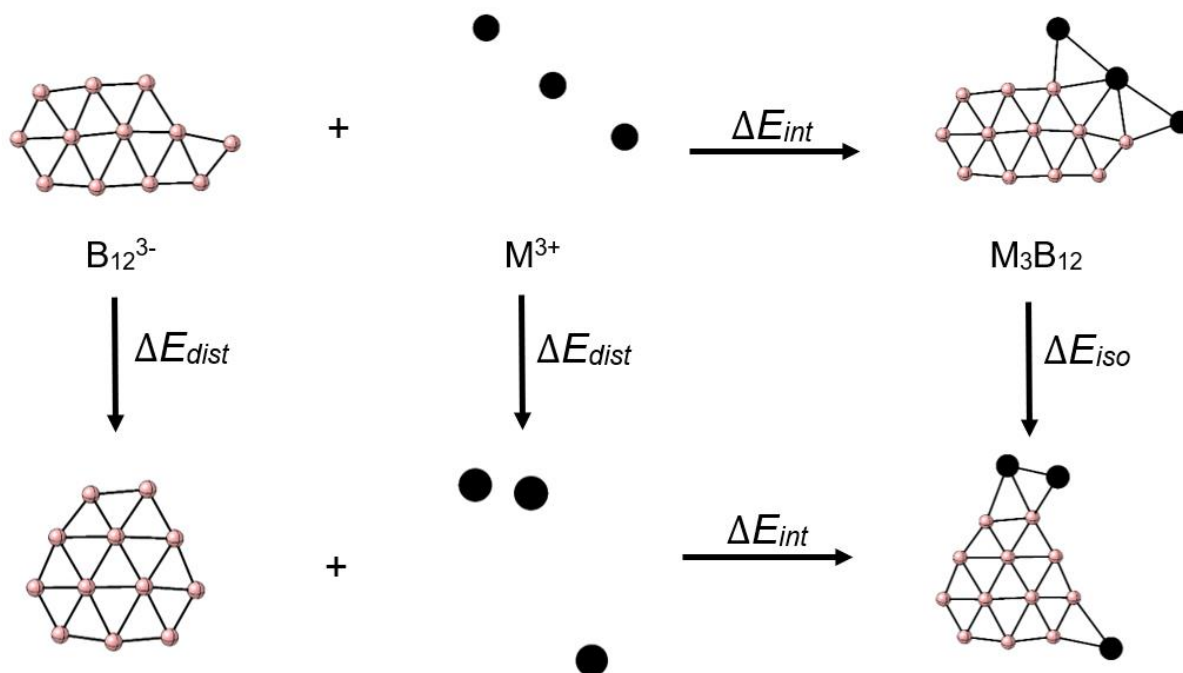

**Figure S17.** The susceptibility of density current for  $\text{Cu}_3\text{B}_{12}$  in a plane  $0.5 \text{ \AA}$  above the molecular plane (vector plot). The scheme for identifying different ring current circuits through a computed profile of the ring current strength (RCS) passing selected planes. The RCS profiles and the identified ring current circuits with their respective RCS value in  $\text{nA} \cdot \text{T}^{-1}$

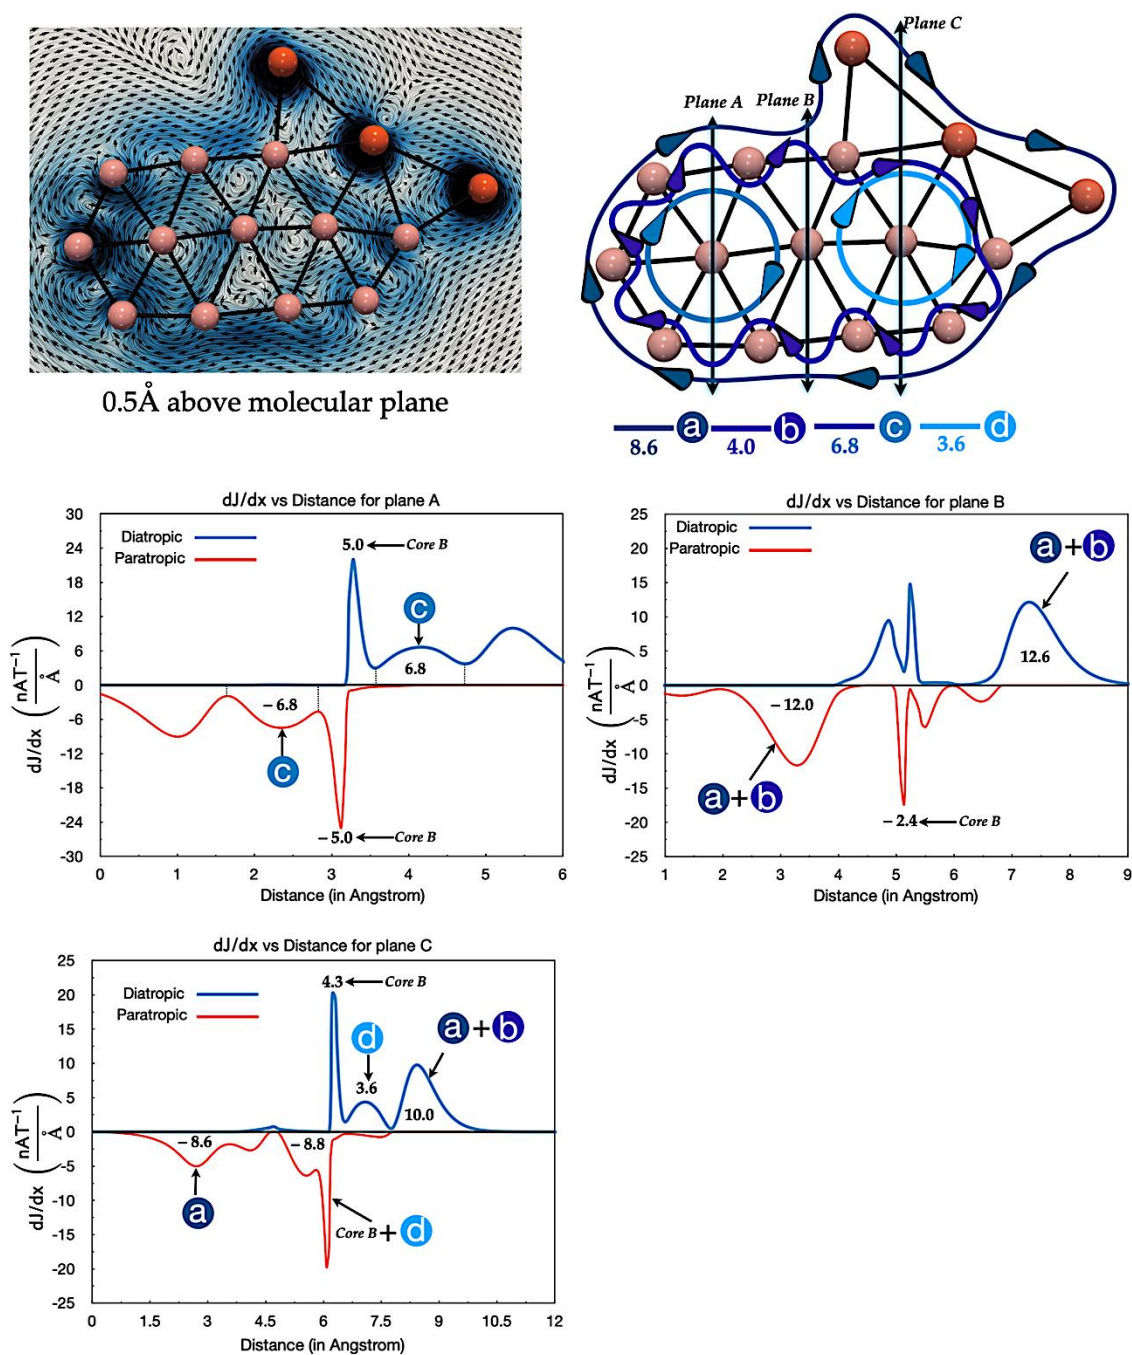



**Figure S18.** The susceptibility of density current for  $\text{Ag}_3\text{B}_{12}$  in a plane  $0.5 \text{ \AA}$  above the molecular plane (vector plot). The scheme for identifying different ring current circuits through a computed profile of the ring current strength (RCS) passing selected planes. The RCS profiles and the identified ring current circuits with their respective RCS value in  $\text{nA} \cdot \text{T}^{-1}$

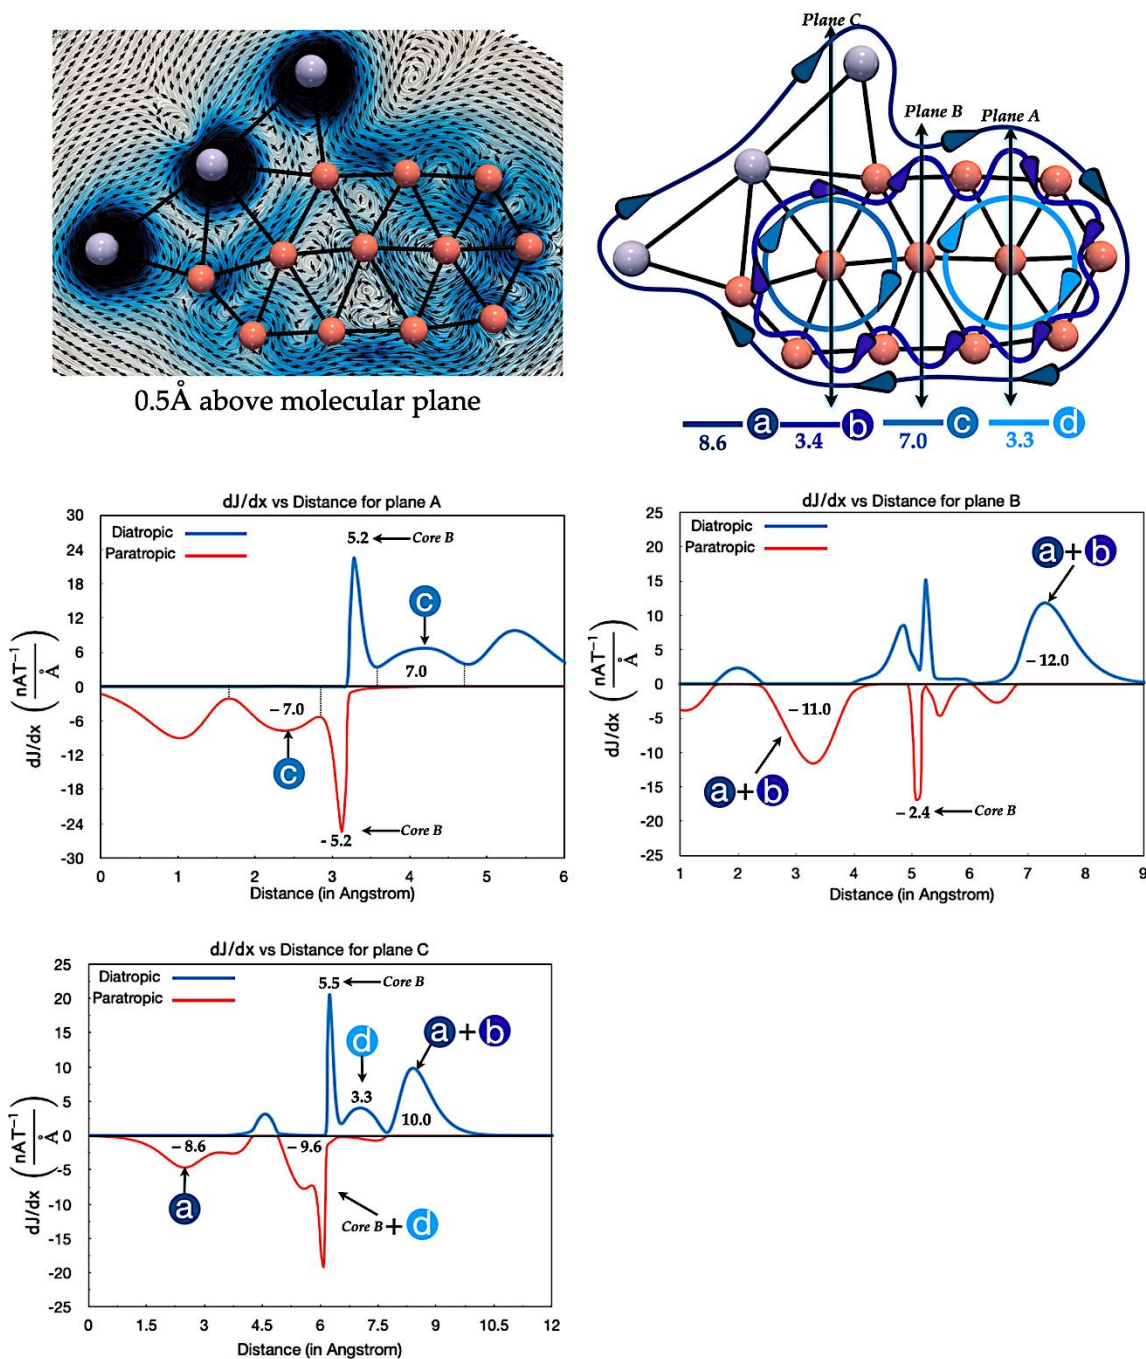

**Figure S19.** The susceptibility of density current for  $\text{Au}_3\text{B}_{12}$  in a plane  $0.5 \text{ \AA}$  above the molecular plane (vector plot). The scheme for identifying different ring current circuits through a computed profile of the ring current strength (RCS) passing selected planes. The RCS profiles and the identified ring current circuits with their respective RCS value in  $\text{nA} \cdot \text{T}^{-1}$

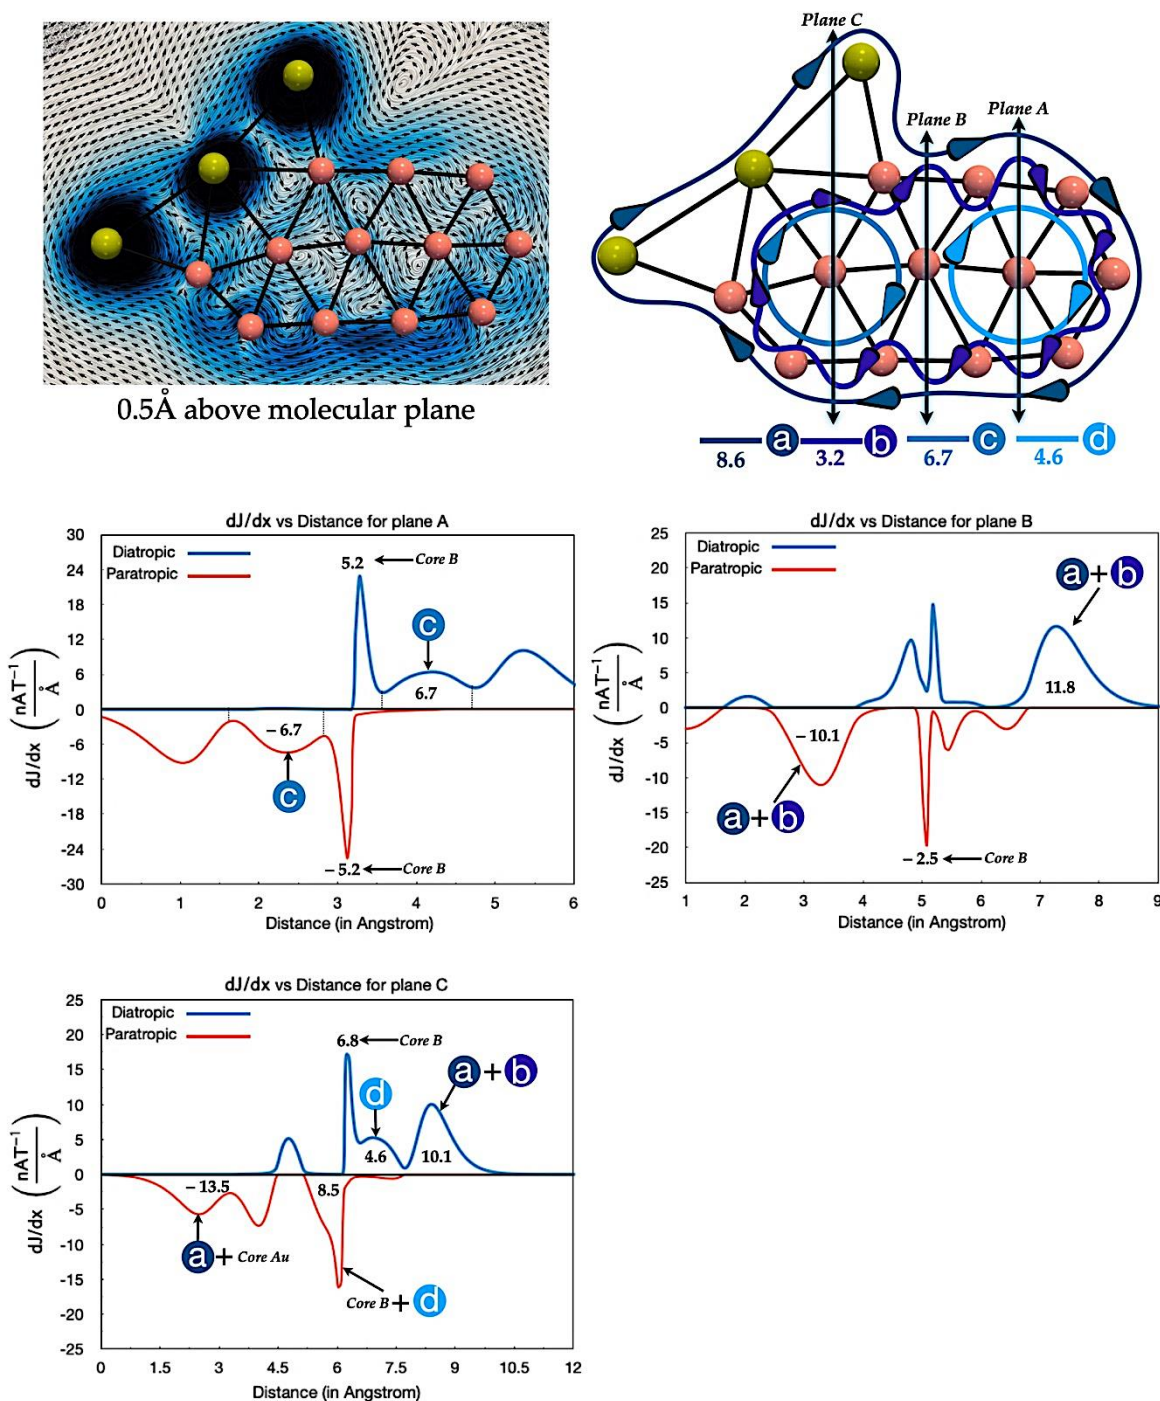

**Table S1.** Computed natural electron configurations of the Cu, Ag and Au atoms in the putative global minima of MB<sub>12</sub>, M<sub>2</sub>B<sub>12</sub> and M<sub>3</sub>B<sub>12</sub> systems

|    | MB <sub>12</sub>                                                                                                    | M <sub>2</sub> B <sub>12</sub>                                                                                                                   | M <sub>3</sub> B <sub>12</sub>                                                                                                                                                                                               |
|----|---------------------------------------------------------------------------------------------------------------------|--------------------------------------------------------------------------------------------------------------------------------------------------|------------------------------------------------------------------------------------------------------------------------------------------------------------------------------------------------------------------------------|
| Cu | [Ar]3d <sup>9.85</sup> 4s <sup>0.42</sup> 4p <sup>0.01</sup>                                                        | [Ar] 3d <sup>9.87</sup> 4s <sup>0.31</sup> 4p <sup>0.02</sup> 4d <sup>0.01</sup><br>[Ar]3d <sup>9.89</sup> 4s <sup>0.76</sup> 4p <sup>0.01</sup> | [Ar]3d <sup>9.89</sup> 4s <sup>0.59</sup> 4p <sup>0.01</sup><br>[Ar]3d <sup>9.90</sup> 4s <sup>0.51</sup> 4p <sup>0.01</sup><br>[Ar]3d <sup>9.85</sup> 4s <sup>0.47</sup> 4p <sup>0.01</sup> 4d <sup>0.01</sup>              |
| Ag | [Kr]4d <sup>9.86</sup> 5s <sup>0.56</sup> 5p <sup>0.01</sup>                                                        | [Kr]4d <sup>9.90</sup> 5s <sup>0.81</sup><br>[Kr]4d <sup>9.88</sup> 5s <sup>0.31</sup> 5p <sup>0.02</sup>                                        | [Kr]4d <sup>9.90</sup> 5s <sup>0.62</sup> 5p <sup>0.01</sup><br>[Kr]4d <sup>9.90</sup> 5s <sup>0.55</sup> 5p <sup>0.01</sup><br>[Kr]4d <sup>9.86</sup> 5s <sup>0.49</sup> 5p <sup>0.01</sup> 5d <sup>0.01</sup>              |
| Au | [Xe]4f <sup>14</sup> 5d <sup>9.67</sup> 6s <sup>0.94</sup> 6p <sup>0.01</sup> 7s <sup>0.01</sup> 6d <sup>0.01</sup> | [Xe]4f <sup>14</sup> 5d <sup>9.77</sup> 6s <sup>1.09</sup><br>[Xe]4f <sup>14</sup> 5d <sup>9.73</sup> 6s <sup>0.74</sup>                         | [Xe]4f <sup>14</sup> 5d <sup>9.77</sup> 6s <sup>0.92</sup><br>[Xe]4f <sup>14</sup> 5d <sup>9.80</sup> 6s <sup>0.88</sup><br>[Xe]4f <sup>14</sup> 5d <sup>9.72</sup> 6s <sup>0.61</sup> 6p <sup>0.01</sup> 6d <sup>0.02</sup> |



## Cartesian Coordinates

Cartesian Coordinates of isomers of the  $\text{MnB}_{12}$  (M = Cu, Ag, Au) (n = 1-3) clusters at the PBE0-D3/def2-TZVP level.

| 1a |              |              |              | 1b |              |              |
|----|--------------|--------------|--------------|----|--------------|--------------|
| B  | -1.829609000 | -2.358315000 | -0.198053000 | B  | -1.757733000 | 1.014828000  |
| B  | -1.863318000 | 2.370056000  | -0.182873000 | Cu | 0.000000000  | 0.000000000  |
| B  | -3.177924000 | -1.583553000 | -0.120911000 | B  | -0.767479000 | 2.240394000  |
| B  | -3.206498000 | 1.576512000  | -0.127826000 | B  | 1.556499000  | -1.784854000 |
| B  | -0.347647000 | -1.741961000 | -0.102994000 | B  | 1.757733000  | 1.014828000  |
| Cu | 2.821052000  | -0.054865000 | -0.112361000 | B  | 0.000000000  | -2.029656000 |
| B  | -1.788559000 | -0.828200000 | 0.337157000  | B  | 0.838774000  | -0.484266000 |
| B  | -0.386539000 | 1.749573000  | -0.069989000 | B  | 0.000000000  | 0.968533000  |
| B  | -3.420116000 | 0.009697000  | 0.022450000  | B  | -0.838774000 | -0.484266000 |
| B  | -1.813665000 | 0.849386000  | 0.413797000  | B  | -1.556499000 | -1.784854000 |
| B  | 0.997713000  | -0.808934000 | -0.108699000 | B  | -2.323978000 | -0.455541000 |
| B  | 0.934685000  | 0.793945000  | -0.277256000 | B  | 2.323978000  | -0.455541000 |
| B  | -0.357535000 | 0.021571000  | 0.304096000  | B  | 0.767479000  | 2.240394000  |
| 1c |              |              |              | 1d |              |              |
| B  | -1.063395000 | 0.948857000  | -0.315927000 | B  | -0.704946000 | 0.678795000  |
| B  | -3.721650000 | -0.060628000 | -0.100649000 | B  | 2.840382000  | -1.517559000 |
| Cu | 2.589385000  | 0.128130000  | -0.150207000 | Cu | -2.239593000 | 0.210760000  |
| B  | -2.823101000 | 1.286626000  | -0.094461000 | B  | 3.329572000  | -0.066418000 |
| B  | -0.491290000 | -0.637591000 | -0.183550000 | B  | -0.069300000 | 2.102516000  |
| B  | -0.059352000 | -2.115866000 | 0.352499000  | B  | 1.431231000  | -1.993496000 |
| B  | -0.144748000 | 2.099067000  | 0.398256000  | B  | 0.551511000  | -0.640948000 |
| B  | 0.622022000  | 0.670363000  | 0.311589000  | B  | 2.063696000  | -0.330410000 |
| B  | -3.191257000 | -1.507349000 | 0.016291000  | B  | 1.341565000  | 2.372363000  |
| B  | -2.135548000 | -0.333379000 | -0.386418000 | B  | -0.092987000 | -2.103144000 |
| B  | -1.655767000 | 2.378062000  | 0.192381000  | B  | 1.080951000  | 0.941178000  |
| B  | 0.986273000  | -0.934401000 | 0.466888000  | B  | 2.494968000  | 1.279358000  |
| B  | -1.627424000 | -1.989028000 | 0.087933000  | B  | -1.075804000 | -0.919170000 |

| 2a |              |              |              | 2b |              |              |
|----|--------------|--------------|--------------|----|--------------|--------------|
| B  | -0.395452000 | -0.395247000 | 0.789886000  | B  | 0.687427000  | -2.103763000 |
| B  | 0.375188000  | 2.316943000  | -0.837406000 | B  | 3.688863000  | 1.503895000  |
| B  | -0.158479000 | 0.916187000  | -1.748095000 | B  | -0.082173000 | -0.678482000 |
| B  | -0.054309000 | 3.737461000  | 1.578220000  | B  | 2.135336000  | 1.977951000  |
| B  | 0.248661000  | 0.886361000  | 0.000000000  | B  | 2.177437000  | -2.381612000 |
| B  | -0.166560000 | 2.397327000  | -2.370089000 | B  | 4.210682000  | 0.055650000  |
| B  | -0.395452000 | -0.395247000 | -0.789886000 | B  | 1.543299000  | -0.953739000 |
| B  | 0.375188000  | 2.316943000  | 0.837406000  | B  | 0.589346000  | 2.101158000  |
| B  | -0.054309000 | 3.737461000  | -1.578220000 | Ag | -2.243564000 | -0.059784000 |
| B  | -0.166560000 | 2.397327000  | 2.370089000  | B  | 2.606373000  | 0.330040000  |
| B  | -0.158479000 | 0.916187000  | 1.748095000  | B  | 3.317830000  | -1.290261000 |
| Ag | 0.049273000  | -2.425374000 | 0.000000000  | B  | -0.439603000 | 0.918607000  |
| B  | 0.087402000  | 3.966817000  | 0.000000000  | B  | 0.985185000  | 0.631370000  |

| 2c |              |              |              | 2d |              |              |              |
|----|--------------|--------------|--------------|----|--------------|--------------|--------------|
| B  | 0.193729000  | 1.549854000  | 0.547371000  | B  | 1.833824000  | -1.949970000 | 0.018132000  |
| B  | 4.282628000  | 0.831050000  | -0.109385000 | B  | 0.243377000  | 2.056819000  | 0.795751000  |
| B  | 0.478270000  | -1.234232000 | 0.351749000  | B  | 3.094382000  | -1.389537000 | -0.862146000 |
| Ag | -2.532623000 | -0.069794000 | -0.073981000 | B  | 1.542197000  | 2.411581000  | 0.017349000  |
| B  | 3.320143000  | 2.034413000  | 0.076068000  | B  | 0.399570000  | -2.144818000 | 0.712720000  |
| B  | 3.889097000  | -0.718562000 | -0.193360000 | Ag | -1.962951000 | -0.008966000 | -0.241821000 |
| B  | 2.079731000  | -0.942324000 | -0.327433000 | B  | 2.409902000  | -0.265615000 | 0.097834000  |
| B  | 1.628484000  | -2.361497000 | 0.333853000  | B  | -0.291455000 | 0.592737000  | 1.230747000  |
| B  | -0.484617000 | 0.108721000  | 0.468892000  | B  | 1.027106000  | -0.665494000 | 0.957823000  |
| B  | 2.683624000  | 0.623028000  | -0.447096000 | B  | 2.677002000  | 1.383018000  | -0.516097000 |
| B  | 1.028882000  | 0.354088000  | -0.181234000 | B  | 3.487034000  | 0.091247000  | -1.081096000 |
| B  | 3.141553000  | -2.129988000 | 0.068975000  | B  | 1.445015000  | 0.943075000  | 0.713687000  |
| B  | 1.708262000  | 1.969484000  | 0.181714000  | B  | -0.567665000 | -1.016576000 | 1.230288000  |
| 2e |              |              |              |    |              |              |              |
| B  | 0.746748000  | 0.237849000  | 0.000000000  |    |              |              |              |
| B  | 0.038907000  | 1.749857000  | 2.379211000  |    |              |              |              |
| B  | 0.038907000  | 1.749857000  | -2.379211000 |    |              |              |              |
| B  | -1.024989000 | 2.548404000  | 1.593953000  |    |              |              |              |
| B  | -1.024989000 | 2.548404000  | -1.593953000 |    |              |              |              |
| B  | 2.266693000  | 0.185914000  | 0.771486000  |    |              |              |              |
| B  | -0.325317000 | 1.259671000  | -0.844113000 |    |              |              |              |
| B  | -1.249761000 | 2.557348000  | 0.000000000  |    |              |              |              |
| B  | -0.325317000 | 1.259671000  | 0.844113000  |    |              |              |              |
| B  | 1.158097000  | 0.780164000  | 1.767626000  |    |              |              |              |
| B  | 1.158097000  | 0.780164000  | -1.767626000 |    |              |              |              |
| B  | 2.266693000  | 0.185914000  | -0.771486000 |    |              |              |              |
| Ag | -0.396146000 | -1.685448000 | 0.000000000  |    |              |              |              |

| 3a |              |              |              | 3b |              |              |              |
|----|--------------|--------------|--------------|----|--------------|--------------|--------------|
| Au | 0.021973000  | -1.827246000 | 0.000000000  | B  | 0.045601000  | 0.132092000  | -0.343707000 |
| B  | -0.165650000 | 2.904769000  | 2.378127000  | B  | 0.769229000  | 1.580362000  | -0.455075000 |
| B  | -0.129262000 | 1.421247000  | -1.755369000 | B  | 2.300331000  | 1.964798000  | -0.150993000 |
| B  | 0.048861000  | 4.453736000  | 0.000000000  | B  | 4.463945000  | -0.737803000 | 0.130609000  |
| B  | -0.336642000 | 0.107831000  | -0.807014000 | B  | 2.661913000  | -0.942537000 | 0.329237000  |
| B  | -0.080159000 | 4.240879000  | 1.584803000  | B  | 2.176003000  | -2.363346000 | -0.303094000 |
| B  | -0.165650000 | 2.904769000  | -2.378127000 | B  | 3.915474000  | 2.024015000  | -0.097981000 |
| B  | 0.369811000  | 2.835591000  | 0.839832000  | B  | 4.871982000  | 0.812494000  | 0.040546000  |
| B  | -0.336642000 | 0.107831000  | 0.807014000  | B  | 1.048047000  | -1.218335000 | -0.259343000 |
| B  | -0.129262000 | 1.421247000  | 1.755369000  | B  | 3.287509000  | 0.615421000  | 0.431545000  |
| B  | 0.369811000  | 2.835591000  | -0.839832000 | B  | 1.606426000  | 0.358148000  | 0.230200000  |
| B  | -0.080159000 | 4.240879000  | -1.584803000 | B  | 3.701121000  | -2.143169000 | -0.100893000 |
| B  | 0.287766000  | 1.396125000  | 0.000000000  | Au | -1.927789000 | -0.060049000 | 0.023350000  |

| 3c |              |              |              | 3d |              |              |              |
|----|--------------|--------------|--------------|----|--------------|--------------|--------------|
| B  | -2.614765000 | -2.408896000 | -0.126863000 | Au | 0.020908000  | -1.920189000 | 0.000000000  |
| B  | 0.000890000  | 0.887446000  | 0.772871000  | B  | 0.168196000  | 3.763979000  | 2.131572000  |
| B  | -3.726094000 | -1.250455000 | -0.439900000 | B  | 0.027313000  | 1.040350000  | -1.362254000 |
| B  | -1.609757000 | 0.592422000  | 0.684660000  | B  | 0.162658000  | 2.241789000  | 2.403530000  |
| B  | -1.171582000 | -2.198579000 | 0.431131000  | B  | 0.162658000  | 2.241789000  | -2.403530000 |
| Au | 1.359898000  | -0.164318000 | -0.420627000 | B  | 0.218615000  | 4.528593000  | 0.791437000  |
| B  | -2.202118000 | -0.948316000 | 0.440526000  | B  | 0.168196000  | 3.763979000  | -2.131572000 |
| B  | -1.000467000 | 2.091040000  | 0.533735000  | B  | 0.027313000  | 1.040350000  | 1.362254000  |
| B  | -4.527697000 | 0.132282000  | -0.762664000 | B  | -0.813218000 | 1.487110000  | 0.000000000  |
| B  | -3.168734000 | 0.342261000  | 0.099567000  | B  | -0.390961000 | 2.810626000  | 0.878069000  |
| B  | -3.995908000 | 1.577615000  | -0.532453000 | B  | 0.218615000  | 4.528593000  | -0.791437000 |
| B  | -2.542149000 | 2.009603000  | 0.093577000  | B  | 0.111229000  | 0.081199000  | 0.000000000  |
| B  | -0.433513000 | -0.769463000 | 0.728210000  | B  | -0.390961000 | 2.810626000  | -0.878069000 |
| 3e |              |              |              | 3f |              |              |              |
| B  | -0.658323000 | 0.558270000  | 0.000000000  | B  | -5.357987000 | -1.026024000 | 0.064093000  |
| B  | -0.010422000 | 2.157024000  | -2.401632000 | B  | -1.837826000 | 1.262107000  | -0.099076000 |
| B  | -0.010422000 | 2.157024000  | 2.401632000  | B  | -3.812130000 | -1.420299000 | -0.014878000 |
| B  | 0.984418000  | 3.018164000  | -1.595618000 | B  | -4.960543000 | 1.681655000  | 0.105092000  |
| B  | 0.984418000  | 3.018164000  | 1.595618000  | B  | -5.915337000 | 0.449575000  | -0.012053000 |
| B  | -2.222290000 | 0.637037000  | -0.771935000 | B  | -3.346305000 | 1.652606000  | 0.045621000  |
| B  | 0.317960000  | 1.709453000  | 0.845009000  | B  | -2.193693000 | -1.669705000 | -0.023371000 |
| B  | 1.179924000  | 3.052056000  | 0.000000000  | Au | 2.235677000  | 0.113250000  | 0.000997000  |
| B  | 0.317960000  | 1.709453000  | -0.845009000 | B  | -4.287990000 | 0.207901000  | -0.296068000 |
| B  | -1.116436000 | 1.180485000  | -1.794235000 | B  | -1.114738000 | -0.178622000 | -0.072626000 |
| B  | -1.116436000 | 1.180485000  | 1.794235000  | B  | -0.631584000 | -1.833248000 | 0.015453000  |
| B  | -2.222290000 | 0.637037000  | 0.771935000  | B  | -2.777088000 | -0.077495000 | 0.255638000  |
| Au | 0.226072000  | -1.330041000 | 0.000000000  | B  | 0.531467000  | -0.835926000 | 0.020667000  |

| 4a |              |              |              | 4b |              |              |              |
|----|--------------|--------------|--------------|----|--------------|--------------|--------------|
| B  | 3.418818000  | 1.918247000  | 0.572012000  | B  | 0.774373000  | 2.105826000  | -0.952812000 |
| B  | 1.019947000  | -0.167855000 | -0.274604000 | Cu | -1.226883000 | -0.609239000 | -0.691714000 |
| B  | 1.954823000  | 2.209424000  | 0.995273000  | B  | -0.767388000 | 2.107313000  | -0.953847000 |
| B  | 0.017865000  | -1.370559000 | 0.145594000  | B  | -1.538658000 | -0.998450000 | 1.405221000  |
| B  | 3.987546000  | 0.557027000  | -0.088459000 | B  | 1.728391000  | 1.417894000  | 0.163214000  |
| B  | 1.508943000  | -1.834757000 | -0.312255000 | B  | -0.002782000 | -1.347568000 | 1.224804000  |
| B  | 2.214495000  | 0.979826000  | -0.029322000 | B  | 0.001888000  | 1.627766000  | 0.427742000  |
| Cu | -1.968313000 | -1.149569000 | 0.435682000  | B  | -0.825543000 | 0.623832000  | 1.541219000  |
| Cu | -2.199697000 | 1.109671000  | -0.518787000 | B  | -1.724648000 | 1.421859000  | 0.160750000  |
| B  | 3.094110000  | -2.084742000 | -0.426826000 | B  | -2.373970000 | 0.249769000  | 1.029456000  |
| B  | 4.191467000  | -0.992272000 | -0.375544000 | B  | 2.374011000  | 0.243526000  | 1.031879000  |
| B  | 0.659585000  | 1.295885000  | 0.709255000  | B  | 1.533801000  | -1.002008000 | 1.405526000  |
| B  | -0.530946000 | 0.246148000  | 0.255770000  | B  | 0.826218000  | 0.622476000  | 1.541745000  |
| B  | 2.637802000  | -0.524967000 | -0.688881000 | Cu | 1.225902000  | -0.610112000 | -0.691889000 |

| 4c |              |              |              | 4d |              |              |              |
|----|--------------|--------------|--------------|----|--------------|--------------|--------------|
| Cu | -2.398361000 | -0.000098000 | 0.183294000  | Cu | 2.836402000  | 0.055218000  | -0.403054000 |
| B  | 0.397037000  | -2.328639000 | -0.376297000 | B  | -3.629970000 | -0.839795000 | -1.219774000 |
| B  | 0.173537000  | -0.000490000 | 1.196096000  | B  | 1.275512000  | 1.126721000  | 0.061824000  |
| B  | 0.185362000  | -1.526525000 | -1.665337000 | B  | -2.687227000 | -1.884277000 | -0.620312000 |
| B  | 0.397001000  | 2.329034000  | -0.374255000 | B  | 0.321541000  | 2.315978000  | -0.108895000 |
| B  | 0.682527000  | -1.748980000 | 1.072482000  | B  | -3.719447000 | 0.679073000  | -0.968956000 |
| Cu | 1.640475000  | 0.000130000  | -0.409690000 | B  | -1.247525000 | 2.173830000  | 0.042044000  |
| B  | -0.503423000 | -0.843159000 | -0.139843000 | B  | -1.611268000 | -1.711328000 | 0.480792000  |
| B  | 0.682524000  | 1.748101000  | 1.073997000  | B  | -0.246562000 | 0.975526000  | 0.738174000  |
| B  | 0.068105000  | 0.000921000  | -1.992535000 | B  | -2.505955000 | -0.234874000 | -0.013921000 |
| B  | 0.185398000  | 1.528078000  | -1.664031000 | B  | -2.803580000 | 1.621994000  | -0.152024000 |
| B  | 1.315504000  | -0.771418000 | 2.160677000  | B  | -1.223171000 | -0.425931000 | 1.257962000  |
| B  | 1.315489000  | 0.769602000  | 2.161358000  | B  | -1.902205000 | 1.011156000  | 1.096705000  |
| B  | -0.503328000 | 0.843289000  | -0.139216000 | Cu | 0.608401000  | -0.884196000 | 0.300705000  |
| 4e |              |              |              | 4f |              |              |              |
| B  | -0.242695000 | 2.937690000  | 0.000000000  | B  | 0.104640000  | -2.315955000 | -0.533406000 |
| B  | 0.242695000  | -2.937690000 | 0.000000000  | Cu | 0.589688000  | 0.012066000  | -0.824547000 |
| B  | -0.372112000 | 2.265083000  | 1.407381000  | B  | 1.588559000  | -2.073140000 | -0.078192000 |
| B  | 0.372112000  | -2.265083000 | 1.407381000  | B  | 0.302542000  | 1.487245000  | 0.941950000  |
| B  | -0.372112000 | 2.265083000  | -1.407381000 | B  | -1.135946000 | -1.474071000 | -1.067109000 |
| B  | 0.372112000  | -2.265083000 | -1.407381000 | B  | 0.598348000  | 0.014400000  | 1.544030000  |
| B  | -0.789583000 | 1.345374000  | 0.000000000  | B  | -1.650950000 | -0.039669000 | -1.362577000 |
| B  | 0.789583000  | -1.345374000 | 0.000000000  | B  | -0.002144000 | 2.312437000  | -0.537207000 |
| B  | -0.372112000 | 0.716914000  | 1.664175000  | B  | 0.365713000  | -1.469531000 | 0.941169000  |
| B  | 0.372112000  | -0.716914000 | -1.664175000 | B  | 1.492885000  | 2.139059000  | -0.085591000 |
| B  | -0.372112000 | 0.716914000  | -1.664175000 | B  | 1.982304000  | -0.778382000 | 0.759495000  |
| B  | 0.372112000  | -0.716914000 | 1.664175000  | B  | 1.945149000  | 0.866413000  | 0.756956000  |
| Cu | 1.222902000  | 0.707362000  | 0.000000000  | B  | -1.204893000 | 1.418410000  | -1.073137000 |
| Cu | -1.222902000 | -0.707362000 | 0.000000000  | Cu | -1.345931000 | -0.027104000 | 0.788964000  |
| 4g |              |              |              | 4h |              |              |              |
| Cu | 1.858207000  | -1.213222000 | -0.138453000 | B  | 0.000000000  | 2.451673000  | -1.148856000 |
| B  | -4.086670000 | 0.769152000  | -0.327212000 | B  | -1.406743000 | -1.989107000 | -0.644440000 |
| B  | -1.231939000 | 0.848913000  | -0.129084000 | B  | -1.406743000 | 1.989107000  | -0.644440000 |
| B  | -2.798502000 | 1.739354000  | -0.048563000 | B  | 0.000000000  | -2.451673000 | -1.148856000 |
| B  | -1.411401000 | -2.344360000 | 0.473967000  | B  | 1.406743000  | 1.989107000  | -0.644440000 |
| Cu | 1.859577000  | 1.212605000  | -0.136051000 | B  | 1.406743000  | -1.989107000 | -0.644440000 |
| B  | -1.232470000 | -0.848928000 | -0.127505000 | B  | 0.000000000  | 1.613462000  | 0.332913000  |
| B  | -1.409827000 | 2.345262000  | 0.470727000  | B  | -1.645688000 | -0.816715000 | 0.354708000  |
| B  | -2.799961000 | -1.738357000 | -0.045854000 | B  | -1.645688000 | 0.816715000  | 0.354708000  |
| B  | -0.086495000 | -1.589461000 | 0.790502000  | Cu | 0.000000000  | 0.000000000  | -1.173268000 |
| B  | -0.085741000 | 1.589494000  | 0.788885000  | B  | 1.645688000  | 0.816715000  | 0.354708000  |
| B  | 0.327241000  | -0.000164000 | 0.458679000  | B  | 1.645688000  | -0.816715000 | 0.354708000  |
| B  | -2.660189000 | 0.000201000  | -0.386373000 | Cu | 0.000000000  | 0.000000000  | 1.654442000  |
| B  | -4.087191000 | -0.767530000 | -0.326043000 | B  | 0.000000000  | -1.613462000 | 0.332913000  |
| 4i |              |              |              | 4j |              |              |              |
| B  | 0.703878000  | 1.430646000  | 1.732174000  | B  | 1.632959000  | 0.000000000  | 0.752139000  |
| B  | -0.049784000 | 0.147375000  | -2.293308000 | B  | -0.816171000 | 1.413565000  | 0.751749000  |
| B  | -0.049784000 | 0.147375000  | 2.293308000  | B  | -1.413565000 | -0.816171000 | -0.751749000 |
| B  | 0.703878000  | 1.430646000  | -1.732174000 | B  | -1.632959000 | 0.000000000  | 0.752139000  |

|           |              |              |              |           |              |              |              |
|-----------|--------------|--------------|--------------|-----------|--------------|--------------|--------------|
| B         | -0.915627000 | -0.836649000 | 1.465291000  | B         | -0.816171000 | -1.413565000 | 0.751749000  |
| B         | -0.915627000 | -0.836649000 | -1.465291000 | B         | 1.413565000  | 0.816171000  | -0.751749000 |
| Cu        | -0.988881000 | 0.941711000  | 0.000000000  | B         | 0.000000000  | 1.632959000  | -0.752139000 |
| B         | 0.815606000  | -0.205159000 | -0.860577000 | B         | 1.413565000  | -0.816171000 | -0.751749000 |
| B         | 0.961539000  | 2.697558000  | 0.770377000  | B         | 0.000000000  | -1.632959000 | -0.752139000 |
| Cu        | 0.509547000  | -2.063974000 | 0.000000000  | B         | 0.816171000  | 1.413565000  | 0.751749000  |
| B         | 0.815606000  | -0.205159000 | 0.860577000  | B         | -1.413565000 | 0.816171000  | -0.751749000 |
| B         | -1.414607000 | -1.190095000 | 0.000000000  | B         | 0.816171000  | -1.413565000 | 0.751749000  |
| B         | 0.961539000  | 2.697558000  | -0.770377000 | Cu        | 0.000000000  | 0.000000000  | 2.109853000  |
| B         | 1.163523000  | 1.231676000  | 0.000000000  | Cu        | 0.000000000  | 0.000000000  | -2.109853000 |
| <b>4k</b> |              |              |              | <b>4l</b> |              |              |              |
| Cu        | -1.030244000 | -1.135056000 | -0.400958000 | B         | -2.928194000 | 2.107504000  | -0.325075000 |
| B         | 1.942241000  | 0.612522000  | 1.282772000  | Cu        | 2.329006000  | -1.035507000 | -0.379835000 |
| B         | -0.456266000 | 1.817141000  | -1.881020000 | B         | -1.441039000 | 2.243138000  | 0.099212000  |
| B         | -2.068607000 | -0.186408000 | 1.370469000  | B         | -1.848433000 | -1.962721000 | 0.552036000  |
| Cu        | 1.503432000  | -0.849341000 | -0.350777000 | B         | -3.775390000 | 0.744171000  | -0.465575000 |
| B         | -0.111606000 | 1.886078000  | -0.248320000 | B         | -0.312809000 | -1.647791000 | 0.933104000  |
| B         | -1.202024000 | 1.112701000  | 0.746243000  | Cu        | 1.720592000  | 1.208003000  | 0.229089000  |
| B         | -0.658877000 | 0.098798000  | 2.113667000  | B         | -3.452730000 | -1.912711000 | 0.373246000  |
| B         | 1.033729000  | 1.740082000  | -1.503893000 | B         | -0.392017000 | 1.028476000  | 0.316603000  |
| B         | -2.541204000 | 0.387190000  | 0.015652000  | B         | 0.583848000  | -0.399250000 | 0.495175000  |
| B         | -1.663651000 | 1.287012000  | -0.994402000 | B         | -1.934626000 | 0.796385000  | -0.429828000 |
| B         | 1.707858000  | 1.285274000  | -0.141253000 | B         | -1.018348000 | -0.559724000 | -0.086884000 |
| B         | 0.911050000  | 0.161975000  | 2.344049000  | B         | -4.295565000 | -0.716255000 | -0.137727000 |
| B         | 0.362871000  | 1.307138000  | 1.256094000  | B         | -2.672364000 | -0.721699000 | -0.449956000 |
| <b>4m</b> |              |              |              | <b>4n</b> |              |              |              |
| Cu        | -3.208105000 | 0.342206000  | -0.019655000 | B         | -0.594141000 | -1.511607000 | 0.566345000  |
| B         | 4.494686000  | 1.195235000  | -0.000686000 | B         | 0.253284000  | 2.745704000  | 0.221649000  |
| Cu        | -1.153188000 | -1.060542000 | -0.044574000 | B         | 0.904774000  | -1.880034000 | 0.925009000  |
| B         | 5.055961000  | -0.251419000 | -0.208522000 | B         | 1.674443000  | 2.173544000  | 0.491343000  |
| B         | -1.380157000 | 1.015842000  | 0.051735000  | B         | -2.076423000 | -0.743258000 | 0.476182000  |
| B         | 2.915272000  | 1.581460000  | 0.032991000  | B         | -1.109328000 | 1.917605000  | 0.088188000  |
| B         | 0.967095000  | -1.084210000 | 0.136542000  | B         | 0.712484000  | -0.472941000 | 0.138896000  |
| B         | 4.125497000  | -1.454482000 | 0.057817000  | B         | 2.220479000  | 0.658027000  | 0.592073000  |
| B         | 0.219539000  | 0.429037000  | 0.138888000  | B         | 2.153807000  | -0.898824000 | 0.943412000  |
| B         | 3.401903000  | -0.015146000 | -0.334814000 | B         | 0.482861000  | 1.175927000  | -0.115964000 |
| B         | -0.253115000 | 2.024153000  | -0.020384000 | B         | -0.810618000 | 0.132570000  | -0.048476000 |
| B         | 1.342428000  | 1.889803000  | -0.020966000 | Cu        | -3.902795000 | -0.322088000 | -0.298545000 |
| B         | 2.495888000  | -1.417848000 | 0.167635000  | B         | -2.292192000 | 0.789862000  | 0.203266000  |
| B         | 1.910504000  | 0.253928000  | 0.372291000  | Cu        | 3.640825000  | -0.382494000 | -0.474201000 |
| <b>4o</b> |              |              |              | <b>4p</b> |              |              |              |
| Cu        | -3.204005000 | 0.369675000  | 0.018673000  | Cu        | -0.887923000 | -1.782062000 | 0.000000000  |
| B         | 4.503148000  | 1.254763000  | 0.057909000  | B         | -0.299520000 | 1.496409000  | 0.778536000  |
| Cu        | -1.154309000 | -1.080245000 | -0.007580000 | B         | 0.116638000  | 0.190016000  | 1.702773000  |
| B         | 5.044828000  | -0.230111000 | 0.079963000  | B         | 0.629818000  | 0.342483000  | 0.000000000  |
| B         | -1.364215000 | 1.021573000  | -0.009755000 | B         | 1.071290000  | -1.015607000 | -0.847862000 |
| B         | 2.942685000  | 1.637282000  | -0.020062000 | B         | 0.116638000  | 0.190016000  | -1.702773000 |
| B         | 0.908820000  | -1.175938000 | -0.020228000 | B         | 0.259161000  | -1.297679000 | -2.270832000 |
| B         | 4.103481000  | -1.501176000 | 0.080073000  | B         | 0.635134000  | -2.599012000 | 1.497995000  |
| B         | 0.243414000  | 0.424776000  | -0.052054000 | B         | 0.876815000  | -3.025303000 | 0.000000000  |
| B         | 3.452468000  | 0.006271000  | -0.164204000 | B         | 0.259161000  | -1.297679000 | 2.270832000  |

|           |              |              |              |           |              |              |              |
|-----------|--------------|--------------|--------------|-----------|--------------|--------------|--------------|
| B         | -0.228422000 | 2.056423000  | 0.009675000  | B         | 1.071290000  | -1.015607000 | 0.847862000  |
| B         | 1.341333000  | 1.893572000  | -0.006852000 | B         | -0.299520000 | 1.496409000  | -0.778536000 |
| B         | 2.475725000  | -1.440454000 | -0.010487000 | B         | 0.635134000  | -2.599012000 | -1.497995000 |
| B         | 1.854957000  | 0.174325000  | -0.008321000 | Cu        | 0.013433000  | 3.356987000  | 0.000000000  |
| <b>4q</b> |              |              |              | <b>4r</b> |              |              |              |
| B         | 0.203932000  | 2.510455000  | 0.000000000  | B         | -4.394942000 | 1.464188000  | -0.645294000 |
| B         | -0.726912000 | -2.295054000 | 0.000000000  | Cu        | 2.326792000  | -1.243286000 | -0.226383000 |
| B         | 0.768376000  | 0.956472000  | 0.876313000  | B         | -3.077016000 | 1.979674000  | -0.004717000 |
| B         | -0.435967000 | -1.703746000 | 1.393033000  | B         | 0.303157000  | -1.298744000 | 0.239619000  |
| B         | 0.126858000  | 2.376203000  | 1.570322000  | Cu        | 2.415515000  | 1.420216000  | -0.028644000 |
| B         | -0.435967000 | -1.703746000 | -1.393033000 | B         | -1.248365000 | -1.569226000 | 0.328349000  |
| B         | 0.768376000  | 0.956472000  | -0.876313000 | B         | -4.922481000 | 0.036432000  | -0.769773000 |
| Cu        | -1.194143000 | 0.070126000  | 0.000000000  | B         | -2.145479000 | -0.344408000 | 1.069712000  |
| B         | 0.126858000  | 2.376203000  | -1.570322000 | B         | -1.904578000 | 1.191261000  | 0.617837000  |
| B         | 0.119440000  | -0.388951000 | 2.077563000  | B         | -0.612535000 | 0.088999000  | 0.481352000  |
| B         | 0.160039000  | 1.130566000  | 2.468269000  | B         | -4.281160000 | -1.299049000 | -0.323871000 |
| B         | 0.119440000  | -0.388951000 | -2.077563000 | B         | 1.010581000  | 0.119523000  | 0.236955000  |
| B         | 0.160039000  | 1.130566000  | -2.468269000 | B         | -2.883063000 | -1.603185000 | 0.275561000  |
| Cu        | 1.029571000  | -0.924694000 | 0.000000000  | B         | -3.349503000 | 0.208340000  | -0.026575000 |
| <b>4s</b> |              |              |              | <b>4t</b> |              |              |              |
| B         | -2.049097000 | 0.449791000  | 0.000000000  | B         | -2.645720000 | 0.531375000  | 0.000000000  |
| B         | -0.154441000 | -0.688171000 | 1.821655000  | B         | 1.115869000  | -2.024670000 | 0.000000000  |
| B         | -0.009574000 | 2.046671000  | -1.487166000 | B         | -1.564121000 | -0.635810000 | 0.000000000  |
| Cu        | 0.869995000  | 0.581104000  | 0.000000000  | B         | 2.080529000  | -0.820402000 | 0.000000000  |
| B         | -1.101792000 | 0.721648000  | -1.312489000 | B         | -2.312735000 | 2.054858000  | 0.000000000  |
| B         | 0.336048000  | 0.730912000  | -2.269281000 | Cu        | 0.389767000  | -0.469892000 | 1.423015000  |
| B         | -0.099778000 | 2.587295000  | 0.000000000  | B         | -1.176134000 | 0.964083000  | -0.902525000 |
| Cu        | 0.320125000  | -1.779037000 | 0.000000000  | B         | -0.425501000 | -1.813847000 | 0.000000000  |
| B         | -1.447152000 | -0.855599000 | -0.838769000 | B         | -0.798482000 | 2.446196000  | 0.000000000  |
| B         | 0.336048000  | 0.730912000  | 2.269281000  | B         | 0.389767000  | 1.543339000  | 0.844847000  |
| B         | -0.009574000 | 2.046671000  | 1.487166000  | Cu        | 0.389767000  | -0.469892000 | -1.423015000 |
| B         | -0.154441000 | -0.688171000 | -1.821655000 | B         | 1.601601000  | 0.698198000  | 0.000000000  |
| B         | -1.447152000 | -0.855599000 | 0.838769000  | B         | 0.389767000  | 1.543339000  | -0.844847000 |
| B         | -1.101792000 | 0.721648000  | 1.312489000  | B         | -1.176134000 | 0.964083000  | 0.902525000  |
| <b>4u</b> |              |              |              | <b>4v</b> |              |              |              |
| B         | 2.303334000  | 2.749298000  | -0.893329000 | B         | 3.655934000  | -0.678283000 | -0.852824000 |
| B         | 0.000542000  | -1.149543000 | 0.617099000  | B         | -1.229291000 | 0.665617000  | 0.212101000  |
| B         | 3.453764000  | 1.985140000  | -0.225098000 | B         | 2.811308000  | -1.940337000 | -0.646296000 |
| Cu        | -0.424705000 | -2.753881000 | -0.468029000 | B         | -1.426275000 | -0.916229000 | 0.054384000  |
| B         | 0.754480000  | 2.287896000  | -0.896791000 | B         | 3.255521000  | 0.859776000  | -0.643031000 |
| B         | -0.868141000 | 0.197100000  | 0.260910000  | B         | -0.060998000 | 1.776967000  | 0.290345000  |
| B         | 2.085064000  | 1.171597000  | -0.566171000 | B         | 2.234160000  | -0.511596000 | -0.005806000 |
| Cu        | -2.491068000 | 1.428877000  | 0.307143000  | Cu        | -3.101524000 | 0.127130000  | -0.379177000 |
| B         | 3.326235000  | 0.525797000  | 0.529345000  | B         | 1.279191000  | -2.108716000 | -0.278271000 |
| B         | 1.805180000  | -0.298961000 | 0.210672000  | B         | -0.314681000 | -1.990180000 | -0.198736000 |
| B         | 1.375984000  | -1.278135000 | 1.478181000  | B         | 2.600341000  | 2.306302000  | -0.494082000 |
| B         | 0.512882000  | 0.569252000  | -0.503624000 | B         | 1.182579000  | 2.691906000  | -0.042635000 |
| B         | -0.658547000 | 1.632033000  | -0.484562000 | B         | 1.683767000  | 1.115521000  | 0.222303000  |
| B         | 2.820705000  | -0.706456000 | 1.406505000  | Cu        | 0.399532000  | -0.346224000 | 0.789961000  |
| <b>4w</b> |              |              |              | <b>4x</b> |              |              |              |

|           |              |              |              |           |              |              |              |
|-----------|--------------|--------------|--------------|-----------|--------------|--------------|--------------|
| B         | -1.549116000 | 1.992326000  | -0.074696000 | B         | -0.204965000 | 3.613639000  | 0.320580000  |
| B         | -2.663202000 | 0.646920000  | -0.294653000 | Cu        | 3.487287000  | -1.085326000 | -0.221269000 |
| B         | 0.026718000  | 1.616899000  | -0.248770000 | B         | -1.558601000 | 3.264101000  | -0.342264000 |
| Cu        | 1.844279000  | -1.304227000 | 0.107516000  | B         | 1.940044000  | -0.197847000 | 0.604891000  |
| B         | -3.016497000 | -2.081327000 | 0.247847000  | B         | 1.003723000  | 2.574865000  | 0.637590000  |
| B         | -1.513105000 | -2.367076000 | 0.000651000  | Cu        | -3.109198000 | -1.486333000 | 0.161039000  |
| Cu        | 2.055751000  | 1.232337000  | 0.093186000  | B         | -2.101878000 | 1.832217000  | -0.648135000 |
| B         | -4.141750000 | 0.903386000  | 0.392815000  | B         | 0.380953000  | -0.619371000 | 0.307676000  |
| B         | 0.592245000  | 0.060202000  | -0.524629000 | B         | -0.295002000 | 2.183163000  | -0.498724000 |
| B         | -0.354596000 | -1.279968000 | -0.320683000 | B         | -1.202685000 | -0.853775000 | 0.019724000  |
| B         | -3.796288000 | -0.640303000 | 0.247285000  | B         | 0.860365000  | 1.022785000  | -0.130431000 |
| B         | -3.122074000 | 2.085357000  | 0.316265000  | B         | -2.267308000 | 0.250053000  | -0.488395000 |
| B         | -1.009865000 | 0.394127000  | -0.501533000 | B         | 1.919882000  | 1.313791000  | 1.112571000  |
| B         | -2.072644000 | -0.913578000 | -0.403970000 | B         | -0.667444000 | 0.531996000  | -0.545745000 |
| <b>4y</b> |              |              |              | <b>4z</b> |              |              |              |
| B         | -4.186879000 | -1.251886000 | -0.000198000 | Cu        | -2.932668000 | -0.124964000 | -0.012684000 |
| Cu        | 2.854098000  | -0.512873000 | -0.000162000 | B         | 3.154713000  | -1.568134000 | -0.245270000 |
| B         | -2.907629000 | -2.122790000 | 0.000044000  | Cu        | 1.103228000  | 1.805848000  | 0.170066000  |
| B         | -0.230646000 | 3.084462000  | -0.000038000 | B         | 2.754120000  | -1.605469000 | 1.240007000  |
| B         | -4.213141000 | 0.329948000  | -0.000384000 | B         | -1.305498000 | -0.709217000 | 0.965671000  |
| B         | -1.573364000 | 2.193355000  | -0.000055000 | B         | 2.282948000  | -1.049677000 | -1.487936000 |
| B         | -2.722764000 | -0.463237000 | 0.000092000  | B         | 0.791041000  | -0.052008000 | -0.944755000 |
| B         | 1.223405000  | 2.543118000  | 0.000166000  | B         | -0.972387000 | -0.523679000 | -0.620803000 |
| B         | -2.894202000 | 1.264672000  | -0.000097000 | B         | 0.286700000  | -0.040801000 | 0.644541000  |
| B         | -0.001824000 | 1.423272000  | 0.000204000  | B         | 1.354270000  | -1.205934000 | 1.877550000  |
| B         | -1.380397000 | -1.685737000 | 0.000094000  | B         | -0.213780000 | -0.974968000 | 2.018246000  |
| B         | 1.649170000  | 1.039578000  | -0.000029000 | B         | 1.078979000  | -0.726613000 | -2.483141000 |
| B         | -1.401487000 | 0.514904000  | 0.000113000  | B         | 1.800018000  | -0.730200000 | 0.221624000  |
| Cu        | 0.359653000  | -0.671550000 | 0.000177000  | B         | -0.400370000 | -0.562425000 | -2.098550000 |

|           |              |              |              |           |              |              |              |
|-----------|--------------|--------------|--------------|-----------|--------------|--------------|--------------|
| <b>5a</b> |              |              |              | <b>5b</b> |              |              |              |
| B         | 2.036861000  | 1.683157000  | 0.768431000  | Ag        | 1.487507000  | -0.830424000 | 0.036891000  |
| B         | 3.175999000  | 0.331530000  | 0.808612000  | B         | -2.129751000 | 0.836603000  | -1.335618000 |
| B         | 0.558365000  | 1.331177000  | 0.202955000  | B         | -0.269875000 | 1.696115000  | 2.290692000  |
| Ag        | -1.681762000 | -1.347636000 | 0.441551000  | B         | 1.960257000  | 1.196941000  | -1.198577000 |
| B         | 3.980189000  | -1.685308000 | -1.042056000 | Ag        | -1.306205000 | -1.076971000 | 0.162695000  |
| B         | 2.520560000  | -1.873061000 | -1.529684000 | B         | -0.548998000 | 2.067220000  | 0.701394000  |
| Ag        | -1.550385000 | 1.365489000  | -0.381366000 | B         | 0.737640000  | 1.947407000  | -0.338619000 |
| B         | 4.728219000  | 0.873631000  | 0.642545000  | B         | 0.540392000  | 1.292887000  | -1.988072000 |
| B         | 0.016487000  | -0.209889000 | -0.305061000 | B         | -1.671326000 | 1.348128000  | 1.742133000  |
| B         | 1.211823000  | -1.085817000 | -1.020950000 | B         | 2.195012000  | 1.434723000  | 0.315282000  |
| B         | 4.539134000  | -0.544984000 | -0.041602000 | B         | 1.064183000  | 1.791001000  | 1.424259000  |
| B         | 3.620740000  | 1.909843000  | 0.952813000  | B         | -2.142552000 | 1.126209000  | 0.234682000  |
| B         | 1.563388000  | 0.078917000  | 0.313321000  | B         | -0.977071000 | 0.983039000  | -2.361847000 |
| B         | 2.763233000  | -0.964586000 | -0.208584000 | B         | -0.795561000 | 1.818949000  | -0.943993000 |

| 5c |              |              |              | 5d |              |              |              |
|----|--------------|--------------|--------------|----|--------------|--------------|--------------|
| B  | -1.862196000 | 3.148044000  | -0.805223000 | B  | -1.826543000 | -1.090296000 | 0.968152000  |
| Ag | 0.919746000  | -2.307102000 | -1.164042000 | Ag | 0.859328000  | 1.557262000  | -0.282760000 |
| Ag | 2.467271000  | 1.312263000  | -0.067320000 | Ag | 1.170174000  | -1.121402000 | -0.306726000 |
| B  | -3.296324000 | -1.156903000 | 0.457877000  | B  | -1.253700000 | 2.093374000  | 0.930096000  |
| B  | -0.658910000 | 2.068825000  | -0.726287000 | B  | -1.768376000 | 0.556524000  | 1.178947000  |
| B  | -0.201805000 | -0.692578000 | -0.463822000 | B  | -2.404264000 | 1.653467000  | -0.101236000 |
| B  | -3.314450000 | 2.955909000  | -0.279613000 | B  | -0.418341000 | -1.983162000 | 1.201129000  |
| B  | -4.289205000 | 0.037411000  | 0.529118000  | B  | -0.244805000 | 1.139956000  | 1.650899000  |
| B  | 0.470053000  | 0.869413000  | -0.538252000 | B  | -1.513756000 | -2.561058000 | 0.270884000  |
| B  | -1.725807000 | -1.005435000 | 0.168660000  | B  | -3.257389000 | 0.897893000  | -1.253668000 |
| B  | -2.179704000 | 1.833135000  | 0.072927000  | B  | -2.597268000 | -1.751193000 | -0.584750000 |
| B  | -3.955687000 | 1.584706000  | 0.309055000  | B  | -0.143156000 | -0.459104000 | 1.610365000  |
| B  | -2.671542000 | 0.342416000  | 0.679726000  | B  | -2.724525000 | -0.075088000 | -0.046003000 |
| B  | -1.069095000 | 0.555881000  | 0.077646000  | B  | -3.352192000 | -0.622560000 | -1.456462000 |
| 5e |              |              |              | 5f |              |              |              |
| B  | 0.586442000  | 1.274835000  | 1.077352000  | Ag | -0.640259000 | -3.185119000 | 0.000000000  |
| B  | -0.251493000 | -2.886329000 | 0.109972000  | B  | -0.394167000 | 1.661555000  | 0.782181000  |
| B  | -0.929476000 | 1.600815000  | 1.429767000  | B  | 0.228363000  | 0.462644000  | 1.734552000  |
| B  | -1.682826000 | -2.351623000 | 0.406584000  | B  | 0.625875000  | 0.622843000  | 0.000000000  |
| B  | 2.065085000  | 0.518634000  | 0.943576000  | B  | 1.209645000  | -0.663846000 | -0.839951000 |
| B  | 1.111445000  | -2.048591000 | 0.142980000  | B  | 0.228363000  | 0.462644000  | -1.734552000 |
| B  | -0.711217000 | 0.318849000  | 0.455328000  | B  | 0.669360000  | -0.946704000 | -2.347833000 |
| B  | -2.224497000 | -0.862975000 | 0.703206000  | B  | 1.179078000  | -2.201561000 | 1.556930000  |
| B  | -2.171140000 | 0.631804000  | 1.268094000  | B  | 1.446043000  | -2.438472000 | 0.000000000  |
| B  | -0.474448000 | -1.281836000 | -0.014716000 | B  | 0.669360000  | -0.946704000 | 2.347833000  |
| B  | 0.810776000  | -0.258186000 | 0.224552000  | B  | 1.209645000  | -0.663846000 | 0.839951000  |
| Ag | 3.911618000  | 0.315250000  | -0.316921000 | B  | -0.394167000 | 1.661555000  | -0.782181000 |
| B  | 2.290329000  | -0.958112000 | 0.478141000  | B  | 1.179078000  | -2.201561000 | -1.556930000 |
| Ag | -3.719014000 | 0.336705000  | -0.441164000 | Ag | -0.195537000 | 3.737402000  | 0.000000000  |
| 5g |              |              |              | 5h |              |              |              |
| Ag | 2.436239000  | 0.922271000  | -0.483587000 | Ag | 1.359996000  | 1.352284000  | 0.255344000  |
| B  | -0.061381000 | 0.304131000  | 2.269204000  | B  | -4.586433000 | -0.856865000 | 0.497398000  |
| B  | 0.884880000  | -1.415342000 | 0.285942000  | B  | -1.738042000 | -0.860427000 | 0.152915000  |
| B  | -0.730184000 | 1.213202000  | 1.217708000  | B  | -3.283419000 | -1.805683000 | 0.235640000  |
| B  | -0.298266000 | -1.009502000 | -2.208330000 | B  | -2.060245000 | 2.244962000  | -0.727771000 |
| B  | 0.605475000  | -1.126225000 | 2.021641000  | Ag | 1.546735000  | -1.321176000 | 0.001748000  |
| Ag | -2.343375000 | -0.515174000 | 0.189332000  | B  | -1.812373000 | 0.827651000  | 0.016379000  |
| B  | 0.610406000  | 0.208872000  | 0.702473000  | B  | -1.896186000 | -2.410769000 | -0.292831000 |
| B  | 0.430024000  | -2.099298000 | -1.295145000 | B  | -3.400705000 | 1.649110000  | -0.077669000 |
| B  | -0.841762000 | 1.082368000  | -0.355607000 | B  | -0.741931000 | 1.483743000  | -1.057270000 |
| B  | -0.887455000 | 0.341571000  | -1.753439000 | B  | -0.626573000 | -1.645414000 | -0.762774000 |
| B  | 0.861377000  | -2.595728000 | 1.437016000  | B  | -0.258945000 | -0.025758000 | -0.638551000 |
| B  | 0.783148000  | -3.028663000 | -0.038836000 | B  | -3.185142000 | -0.041692000 | 0.430500000  |
| B  | 0.525301000  | -0.264268000 | -0.911110000 | B  | -4.643144000 | 0.671293000  | 0.353445000  |
| 5i |              |              |              | 5j |              |              |              |
| B  | 4.459533000  | -0.979965000 | -0.760850000 | B  | -3.484207000 | 2.012569000  | -0.618461000 |
| B  | 2.300960000  | 1.807085000  | 1.467674000  | Ag | 1.826606000  | -1.238945000 | -0.317821000 |
| B  | 3.068506000  | -1.818137000 | -0.757982000 | B  | -2.008871000 | 2.215528000  | -0.178344000 |
| Ag | -1.739034000 | -1.162095000 | 0.227965000  | B  | -2.399338000 | -1.890741000 | 0.810003000  |



|           |              |              |              |           |              |              |              |
|-----------|--------------|--------------|--------------|-----------|--------------|--------------|--------------|
| B         | 1.629444000  | -2.398475000 | -0.391405000 | B         | -4.317566000 | 0.632774000  | -0.613394000 |
| B         | 0.897836000  | 1.142304000  | 1.534952000  | B         | -0.881940000 | -1.500939000 | 1.197600000  |
| B         | 4.690970000  | 0.408381000  | -0.147315000 | Ag        | 1.377346000  | 1.358854000  | 0.211211000  |
| B         | 3.562218000  | 1.325919000  | 0.602068000  | B         | -3.997868000 | -1.884954000 | 0.577679000  |
| B         | 1.613540000  | -0.773764000 | -0.352060000 | B         | -0.960967000 | 1.053128000  | 0.222225000  |
| B         | 1.902547000  | 0.788598000  | 0.269513000  | B         | 0.007944000  | -0.310959000 | 0.623443000  |
| B         | 3.158237000  | -0.068679000 | -0.428801000 | B         | -2.480414000 | 0.709208000  | -0.537536000 |
| B         | 0.433575000  | -1.687418000 | 0.294546000  | B         | -1.560160000 | -0.575036000 | 0.010116000  |
| Ag        | -1.232523000 | 1.403604000  | -0.433814000 | B         | -4.833642000 | -0.779970000 | -0.115894000 |
| B         | 0.215267000  | -0.016034000 | 0.604648000  | B         | -3.200125000 | -0.807755000 | -0.375304000 |
| <b>5k</b> |              |              |              | <b>5l</b> |              |              |              |
| B         | -4.259328000 | 0.993384000  | -0.918773000 | B         | -0.110349000 | 4.137436000  | -0.143458000 |
| B         | -3.090653000 | -0.012742000 | -0.004507000 | Ag        | -3.621414000 | -0.874834000 | -0.077640000 |
| B         | -3.238536000 | 1.870370000  | -0.153302000 | B         | 1.242781000  | 3.812924000  | 0.534205000  |
| Ag        | 0.130991000  | -0.992378000 | 0.115776000  | B         | -1.994465000 | 0.252865000  | -0.826791000 |
| B         | -0.710044000 | 1.072366000  | 0.745338000  | B         | -1.243534000 | 3.064585000  | -0.591502000 |
| B         | -4.317860000 | -0.529539000 | -1.148986000 | Ag        | 3.238060000  | -0.904022000 | -0.305212000 |
| B         | -2.360612000 | 1.172615000  | 1.081727000  | B         | 1.861191000  | 2.392572000  | 0.742716000  |
| B         | 0.850052000  | 1.257215000  | 0.172223000  | B         | -0.429580000 | -0.113315000 | -0.495358000 |
| B         | -3.458833000 | -1.649088000 | -0.560371000 | B         | 0.046175000  | 2.649291000  | 0.551774000  |
| B         | -1.794532000 | -0.306280000 | 1.232905000  | B         | 1.148922000  | -0.277475000 | -0.163893000 |
| B         | -0.092576000 | 2.439588000  | -0.032191000 | B         | -1.022797000 | 1.457399000  | 0.042677000  |
| B         | -2.340132000 | -1.561734000 | 0.507529000  | B         | 2.130275000  | 0.843898000  | 0.466818000  |
| B         | -1.669569000 | 2.333755000  | 0.071588000  | B         | -2.070124000 | 1.798338000  | -1.196221000 |
| Ag        | 2.639642000  | 0.249830000  | -0.238262000 | B         | 0.515279000  | 1.025504000  | 0.487067000  |
| <b>5m</b> |              |              |              | <b>5n</b> |              |              |              |
| B         | -1.942221000 | 2.639193000  | -1.445867000 | B         | -4.980247000 | 1.513886000  | 0.119219000  |
| B         | -2.277156000 | -0.945493000 | 1.720337000  | Ag        | 1.810377000  | -1.624732000 | 0.139630000  |
| B         | -0.526167000 | 2.262372000  | -0.724766000 | B         | -3.595849000 | 1.807163000  | 0.754027000  |
| B         | -0.721102000 | -0.686752000 | 1.503682000  | B         | -0.211548000 | -1.182140000 | -0.640580000 |
| B         | -3.314127000 | 2.047927000  | -1.079063000 | Ag        | 1.769987000  | 1.783889000  | -0.143456000 |
| B         | -3.535794000 | -0.245425000 | 1.158469000  | B         | -1.749255000 | -1.540850000 | -0.445964000 |
| Ag        | 2.560781000  | 0.428278000  | 0.149387000  | B         | -5.525377000 | 0.216255000  | -0.481967000 |
| B         | -2.159914000 | 0.655959000  | 1.196093000  | B         | -2.557776000 | -0.704897000 | 0.736086000  |
| B         | -2.055838000 | 1.725942000  | -0.109187000 | B         | -2.348002000 | 0.907479000  | 0.886460000  |
| B         | 0.498526000  | 0.103287000  | 0.874556000  | B         | -1.080015000 | -0.050541000 | 0.303560000  |
| B         | 0.676473000  | 1.516663000  | 0.023977000  | B         | -4.840640000 | -1.159395000 | -0.664240000 |
| B         | -0.693624000 | 1.337143000  | 0.799387000  | B         | 0.501540000  | 0.150993000  | -0.239465000 |
| B         | -3.603067000 | 0.955272000  | 0.091341000  | B         | -3.383687000 | -1.610963000 | -0.393808000 |
| Ag        | -0.376318000 | -1.694367000 | -0.480516000 | B         | -3.884570000 | 0.156934000  | 0.102635000  |
| <b>5o</b> |              |              |              | <b>5p</b> |              |              |              |
| Ag        | 2.821937000  | 0.562918000  | -0.049229000 | B         | 2.281870000  | 2.267691000  | 0.429642000  |
| B         | -5.086835000 | 1.403950000  | 0.014548000  | Ag        | -1.736324000 | -1.353756000 | -0.042296000 |
| Ag        | 0.639700000  | -1.175402000 | 0.026199000  | Ag        | -1.328616000 | 1.522065000  | -0.083971000 |
| B         | -5.691487000 | -0.036647000 | 0.132123000  | B         | 3.525190000  | -2.265814000 | -0.003132000 |
| B         | 0.797308000  | 1.116912000  | -0.022330000 | B         | 1.026788000  | 1.259479000  | 0.475517000  |
| B         | -3.499518000 | 1.746340000  | 0.034053000  | B         | 0.414783000  | -1.592122000 | 0.498624000  |
| B         | -1.625642000 | -0.957508000 | -0.206887000 | B         | 3.752804000  | 1.905291000  | 0.058150000  |
| B         | -4.789262000 | -1.249512000 | -0.182694000 | B         | 4.580940000  | -1.145070000 | -0.205720000 |
| B         | -0.821336000 | 0.532229000  | -0.119577000 | B         | -0.000767000 | -0.045795000 | 0.706063000  |
| B         | -4.034814000 | 0.145894000  | 0.298010000  | B         | 1.930888000  | -2.082012000 | 0.197600000  |

|           |              |              |              |           |              |              |              |
|-----------|--------------|--------------|--------------|-----------|--------------|--------------|--------------|
| B         | -0.328799000 | 2.106823000  | 0.139921000  | B         | 2.549761000  | 0.829336000  | -0.292062000 |
| B         | -1.920564000 | 2.009215000  | 0.123161000  | B         | 4.348286000  | 0.457337000  | -0.245727000 |
| B         | -3.158615000 | -1.250524000 | -0.267601000 | B         | 2.989607000  | -0.787288000 | -0.403851000 |
| B         | -2.521452000 | 0.411482000  | -0.367303000 | B         | 1.410281000  | -0.383136000 | -0.028194000 |
| <b>5q</b> |              |              |              | <b>5r</b> |              |              |              |
| B         | -0.745535000 | 0.179748000  | 0.799117000  | B         | 3.619302000  | -0.049882000 | 0.786531000  |
| B         | 2.449534000  | -0.087580000 | -0.868626000 | Ag        | -0.849831000 | -0.087709000 | 3.696621000  |
| B         | -2.268558000 | 0.059294000  | 0.326216000  | B         | 3.619302000  | -0.049882000 | -0.786531000 |
| B         | 1.512584000  | -1.311768000 | -1.217785000 | B         | -0.470277000 | 0.547800000  | 1.617926000  |
| Ag        | -4.291397000 | -0.291715000 | 0.03166100   | B         | 2.373657000  | 0.013161000  | 1.770239000  |
| B         | 1.605206000  | 1.300063000  | -0.922733000 | Ag        | -0.849831000 | -0.087709000 | -3.696621000 |
| B         | 0.195756000  | 1.373330000  | 0.129781000  | B         | 2.373657000  | 0.013161000  | -1.770239000 |
| B         | 0.073849000  | -1.787230000 | -0.872363000 | B         | -0.654866000 | 0.472983000  | 0.000000000  |
| B         | -1.108665000 | -1.115654000 | -0.092516000 | B         | 2.207660000  | -0.347636000 | 0.000000000  |
| B         | 0.699982000  | 2.604006000  | -0.795452000 | B         | -0.470277000 | 0.547800000  | -1.617926000 |
| B         | -1.560470000 | 1.557648000  | 0.496704000  | B         | 0.776543000  | -0.117562000 | 0.823280000  |
| Ag        | 4.180194000  | -0.240949000 | 0.32920600   | B         | 0.912787000  | 0.368274000  | -2.390641000 |
| B         | 0.577046000  | -0.290332000 | -0.243731000 | B         | 0.912787000  | 0.368274000  | 2.390641000  |
| B         | -0.675843000 | 2.768094000  | -0.104866000 | B         | 0.776543000  | -0.117562000 | -0.823280000 |
| <b>5s</b> |              |              |              | <b>5t</b> |              |              |              |
| Ag        | -2.840865000 | -0.025621000 | 0.042262000  | B         | 2.058807000  | 3.131984000  | 0.123480000  |
| B         | 3.388535000  | -2.062296000 | 0.336910000  | B         | -0.424658000 | 1.006728000  | 0.295672000  |
| Ag        | 1.403544000  | 1.673169000  | -0.234763000 | B         | 2.194469000  | 0.041051000  | 0.548610000  |
| B         | 2.991403000  | -1.504835000 | 1.710800000  | B         | -0.860100000 | -0.518118000 | -0.376890000 |
| B         | -1.067566000 | -0.702979000 | 1.000853000  | B         | -1.574301000 | 1.264362000  | -0.936531000 |
| B         | 2.508383000  | -2.110080000 | -1.006415000 | B         | 0.974597000  | 0.837351000  | 1.231293000  |
| B         | 1.038156000  | -1.054350000 | -0.919840000 | B         | -2.371428000 | -0.059043000 | -0.605693000 |
| B         | -0.724475000 | -1.117192000 | -0.527573000 | B         | 0.757918000  | 3.429219000  | -0.658652000 |
| B         | 0.554883000  | -0.196802000 | 0.456401000  | B         | -0.500875000 | 2.454747000  | -0.778821000 |
| B         | 1.586562000  | -0.934447000 | 2.145859000  | Ag        | 3.847613000  | -1.008084000 | -0.135653000 |
| B         | 0.021020000  | -0.679757000 | 2.082244000  | B         | 2.290567000  | 1.714024000  | 0.827522000  |
| B         | 1.316224000  | -2.234218000 | -2.057107000 | B         | 0.589286000  | -0.439209000 | 0.309431000  |
| B         | 2.050322000  | -1.060308000 | 0.418833000  | B         | 0.663949000  | 2.339535000  | 0.544992000  |
| B         | -0.152634000 | -1.829685000 | -1.831458000 | Ag        | -4.251680000 | -0.609217000 | 0.079864000  |
| <b>5u</b> |              |              |              | <b>5v</b> |              |              |              |
| B         | 2.219923000  | 0.494500000  | 0.741120000  | B         | -0.745535000 | 0.179748000  | 0.799117000  |
| Ag        | -1.714494000 | -1.088987000 | -0.164847000 | B         | 2.449534000  | -0.087580000 | -0.868626000 |
| Ag        | -0.702885000 | 1.603278000  | -0.226615000 | B         | -2.268558000 | 0.059294000  | 0.326216000  |
| B         | 0.203222000  | -2.101760000 | 0.858408000  | B         | 1.512584000  | -1.311768000 | -1.217785000 |
| B         | 1.293818000  | -0.897931000 | 0.978958000  | Ag        | -4.291397000 | -0.291715000 | 0.03166100   |
| B         | 1.585276000  | -2.362489000 | 0.022785000  | B         | 1.605206000  | 1.300063000  | -0.922733000 |
| B         | 1.432532000  | 1.928387000  | 0.781141000  | B         | 0.195756000  | 1.373330000  | 0.129781000  |
| B         | -0.250364000 | -0.710462000 | 1.462378000  | B         | 0.073849000  | -1.787230000 | -0.872363000 |
| B         | 2.757581000  | 1.820180000  | -0.077025000 | B         | -1.108665000 | -1.115654000 | -0.092516000 |
| B         | 2.919173000  | -2.265302000 | -0.888817000 | B         | 0.699982000  | 2.604006000  | -0.795452000 |
| B         | 3.515955000  | 0.525520000  | -0.566959000 | B         | -1.560470000 | 1.557648000  | 0.496704000  |
| B         | 0.603374000  | 0.704675000  | 1.434204000  | Ag        | 4.180194000  | -0.240949000 | 0.32920600   |
| B         | 2.693000000  | -0.989011000 | 0.090024000  | B         | 0.577046000  | -0.290332000 | -0.243731000 |
| B         | 3.749871000  | -0.980649000 | -1.156475000 | B         | -0.675843000 | 2.768094000  | -0.104866000 |
| <b>5w</b> |              |              |              | <b>5x</b> |              |              |              |

|           |              |              |              |           |              |              |              |
|-----------|--------------|--------------|--------------|-----------|--------------|--------------|--------------|
| B         | -0.646258000 | -1.283512000 | 0.682782000  | Ag        | 0.928719000  | -0.239792000 | 1.412871000  |
| B         | 0.223186000  | 2.984137000  | 0.151440000  | B         | -1.099883000 | 0.686991000  | -2.425043000 |
| B         | 0.889462000  | -1.669460000 | 0.956534000  | B         | -2.502090000 | -1.620546000 | 0.769751000  |
| B         | 1.663027000  | 2.429830000  | 0.369043000  | B         | -0.276524000 | 1.741507000  | 1.602774000  |
| B         | -2.078558000 | -0.569777000 | 0.445286000  | Ag        | 0.928719000  | -0.239792000 | -1.412871000 |
| B         | -1.149274000 | 2.133542000  | -0.012913000 | B         | -2.382940000 | -0.169877000 | 0.000000000  |
| B         | 0.710464000  | -0.225135000 | 0.229010000  | B         | -1.554087000 | 1.026998000  | 0.836920000  |
| B         | 2.084017000  | 0.901466000  | 0.535610000  | B         | -0.288856000 | 1.982628000  | 0.000000000  |
| B         | 2.154542000  | -0.748131000 | 0.825994000  | B         | -2.502090000 | -1.620546000 | -0.769751000 |
| B         | 0.490116000  | 1.401412000  | -0.142479000 | B         | -1.099883000 | 0.686991000  | 2.425043000  |
| B         | -0.833281000 | 0.379858000  | -0.006581000 | B         | -1.961477000 | -0.487281000 | 1.789923000  |
| Ag        | -4.103682000 | -0.342117000 | -0.189404000 | B         | -1.961477000 | -0.487281000 | -1.789923000 |
| B         | -2.289681000 | 1.029691000  | 0.238152000  | B         | -0.276524000 | 1.741507000  | -1.602774000 |
| Ag        | 3.974133000  | -0.377449000 | -0.265051000 | B         | -1.554087000 | 1.026998000  | -0.836920000 |
| <b>5y</b> |              |              |              | <b>5z</b> |              |              |              |
| B         | -1.872754000 | 2.904502000  | -1.462300000 | B         | -4.296101000 | 1.245110000  | 0.009888000  |
| B         | -2.481556000 | -0.662534000 | 1.643870000  | B         | -3.477166000 | -0.305120000 | -0.045385000 |
| B         | -0.479627000 | 2.164750000  | -1.065909000 | B         | -3.308911000 | 2.492890000  | 0.004256000  |
| B         | -0.930208000 | -0.477795000 | 1.237559000  | Ag        | 0.384874000  | -1.109265000 | -0.019525000 |
| B         | -3.274597000 | 2.635637000  | -0.852686000 | B         | -0.839219000 | 0.831907000  | -0.016945000 |
| B         | -3.687701000 | 0.239295000  | 1.220714000  | B         | -5.125344000 | -0.168791000 | 0.055739000  |
| Ag        | 2.623684000  | 0.635363000  | 0.210215000  | B         | -2.548460000 | 1.036257000  | -0.041964000 |
| B         | -2.162217000 | 0.814266000  | 1.023046000  | B         | 0.830365000  | 1.145252000  | -0.007407000 |
| B         | -1.949643000 | 2.003831000  | -0.119634000 | B         | -4.442978000 | -1.595205000 | 0.069467000  |
| B         | 0.425235000  | -0.156396000 | 0.346690000  | B         | -1.835688000 | -0.570620000 | -0.024731000 |
| B         | 0.693657000  | 1.159777000  | -0.568885000 | B         | -0.103046000 | 2.349062000  | -0.012730000 |
| B         | -0.644764000 | 1.096995000  | 0.368991000  | B         | -2.862323000 | -1.816558000 | 0.035161000  |
| B         | -3.666559000 | 1.528125000  | 0.276300000  | B         | -1.701142000 | 2.473022000  | -0.014195000 |
| Ag        | -0.492754000 | -2.044986000 | -0.428061000 | Ag        | 2.775766000  | 0.352115000  | 0.018338000  |

|           |              |              |              |           |              |              |              |
|-----------|--------------|--------------|--------------|-----------|--------------|--------------|--------------|
| <b>6a</b> |              |              |              | <b>6b</b> |              |              |              |
| B         | -2.359528000 | 0.997074000  | -1.379674000 | B         | -0.090782000 | 4.303030000  | 0.258336000  |
| B         | -3.424395000 | -0.297347000 | -0.886587000 | Au        | 3.407323000  | -0.657503000 | -0.088699000 |
| B         | -0.867069000 | 0.927545000  | -0.765900000 | B         | -1.461984000 | 4.001126000  | -0.388089000 |
| Au        | 1.421706000  | -1.462028000 | -0.223865000 | B         | 1.875904000  | 0.411937000  | 0.688614000  |
| B         | -4.163997000 | -1.613820000 | 1.535894000  | B         | 1.059236000  | 3.224643000  | 0.642224000  |
| B         | -2.692123000 | -1.593859000 | 2.035384000  | Au        | -3.266635000 | -0.803119000 | 0.055019000  |
| Au        | 0.708058000  | 1.720275000  | 0.231138000  | B         | -2.067407000 | 2.578266000  | -0.657643000 |
| B         | -5.008280000 | 0.165776000  | -0.936921000 | B         | 0.292973000  | 0.045616000  | 0.360653000  |
| B         | -0.219936000 | -0.378593000 | 0.274123000  | B         | -0.278642000 | 2.844763000  | -0.494415000 |
| B         | -1.419408000 | -0.997432000 | 1.253649000  | B         | -1.284721000 | -0.150445000 | 0.070468000  |
| B         | -4.759833000 | -0.906573000 | 0.212677000  | B         | 0.840793000  | 1.644009000  | -0.089131000 |
| B         | -3.953734000 | 1.069433000  | -1.617645000 | B         | -2.324148000 | 1.016004000  | -0.478572000 |
| B         | -1.809722000 | -0.300083000 | -0.342244000 | B         | 1.920236000  | 1.950023000  | 1.137535000  |
| B         | -2.972258000 | -1.152426000 | 0.502344000  | B         | -0.704316000 | 1.208842000  | -0.517835000 |

| 6c |              |              |              | 6d |              |              |              |
|----|--------------|--------------|--------------|----|--------------|--------------|--------------|
| Au | -3.892931000 | -0.207605000 | -0.086278000 | B  | 4.106999000  | -0.941297000 | -1.367382000 |
| Au | 3.715058000  | -0.229758000 | -0.250617000 | Au | -1.492280000 | 0.888566000  | -0.713273000 |
| B  | -2.013595000 | -0.472079000 | 0.862184000  | B  | 2.734794000  | -1.605918000 | -1.076849000 |
| B  | 1.679319000  | 2.468747000  | 0.491776000  | B  | 2.385599000  | 2.057902000  | 1.268902000  |
| B  | -2.242891000 | 1.039925000  | 0.397929000  | B  | 4.651317000  | 0.501539000  | -0.877847000 |
| B  | 2.239084000  | 0.975221000  | 0.786254000  | B  | 0.917643000  | 1.488844000  | 1.428168000  |
| B  | -0.542221000 | -1.212998000 | 1.014804000  | Au | -0.083438000 | -1.604058000 | 0.875524000  |
| B  | 2.210499000  | -0.563984000 | 1.294908000  | B  | 3.945135000  | 2.418208000  | 1.035209000  |
| B  | -1.086844000 | 2.142800000  | 0.091047000  | B  | 1.519047000  | -0.918421000 | -0.269916000 |
| B  | 0.267316000  | 2.986819000  | 0.117853000  | B  | 0.029975000  | 0.485159000  | 0.549916000  |
| B  | -0.768651000 | 0.322210000  | 0.145908000  | B  | 2.867838000  | -0.015657000 | -0.775424000 |
| B  | 0.517509000  | 1.381395000  | 0.004632000  | B  | 1.767912000  | 0.756404000  | 0.208187000  |
| B  | 0.961791000  | -1.531096000 | 1.414591000  | B  | 4.924032000  | 1.772149000  | 0.024011000  |
| B  | 0.751569000  | -0.230781000 | 0.451823000  | B  | 3.317390000  | 1.444430000  | -0.115954000 |
| 6e |              |              |              | 6f |              |              |              |
| B  | -2.185604000 | 3.691546000  | -0.705743000 | B  | 4.706209000  | -0.833094000 | -1.066305000 |
| B  | 1.641675000  | 0.278476000  | 0.708494000  | B  | 2.679378000  | 0.670539000  | 2.276674000  |
| B  | -1.092513000 | 4.606456000  | -0.116469000 | B  | 3.255898000  | -1.344501000 | -1.556556000 |
| Au | 3.019827000  | -0.991717000 | 0.047029000  | Au | -1.160061000 | -1.453651000 | 0.313823000  |
| B  | -1.999021000 | 2.109477000  | -0.841085000 | B  | 1.761449000  | -1.850596000 | -1.616622000 |
| B  | 0.111850000  | 0.448043000  | 0.143821000  | B  | 1.191823000  | 0.401275000  | 1.942185000  |
| B  | -0.617311000 | 3.171109000  | -0.731122000 | B  | 5.028484000  | -0.053655000 | 0.214738000  |
| Au | -2.793756000 | -0.921538000 | 0.239010000  | B  | 3.952325000  | 0.482047000  | 1.313661000  |
| B  | 0.317460000  | 4.117589000  | 0.449081000  | B  | 1.831395000  | -0.514021000 | -0.643402000 |
| B  | 0.721928000  | 2.272386000  | 0.062246000  | B  | 2.281989000  | 0.399445000  | 0.725614000  |
| B  | 1.812434000  | 1.791454000  | 1.296453000  | B  | 3.480400000  | -0.103087000 | -0.304271000 |
| B  | -0.459867000 | 1.531991000  | -0.858202000 | B  | 0.535328000  | -1.508427000 | -0.754892000 |
| B  | -1.572421000 | 0.544904000  | -0.278313000 | Au | -0.653688000 | 1.638154000  | -0.325515000 |
| B  | 1.431572000  | 3.270431000  | 1.192855000  | B  | 0.472037000  | 0.118443000  | 0.474752000  |
| 6g |              |              |              | 6h |              |              |              |
| Au | -1.413517000 | -0.598912000 | -0.072095000 | B  | -1.999838000 | 3.424332000  | -0.031856000 |
| B  | 2.143580000  | 1.035441000  | 1.252517000  | B  | 0.414812000  | 1.261534000  | -0.381768000 |
| B  | 0.042461000  | 2.241164000  | -2.175270000 | B  | -2.215523000 | 0.298945000  | -0.417242000 |
| B  | -1.927316000 | 1.123687000  | 1.348833000  | B  | 0.888933000  | -0.216801000 | 0.334887000  |
| Au | 1.343023000  | -0.685125000 | -0.086893000 | B  | 1.662671000  | 1.516075000  | 0.734095000  |
| B  | 0.380575000  | 2.377186000  | -0.566618000 | B  | -1.054294000 | 1.095504000  | -1.209298000 |
| B  | -0.835170000 | 2.089356000  | 0.533755000  | B  | 2.426548000  | 0.117463000  | 0.693717000  |
| B  | -0.493612000 | 1.322845000  | 2.108673000  | B  | -0.622608000 | 3.735977000  | 0.599849000  |
| B  | 1.496067000  | 1.954909000  | -1.736190000 | B  | 0.635191000  | 2.758744000  | 0.617846000  |
| B  | -2.269379000 | 1.502826000  | -0.131706000 | Au | -3.791712000 | -0.689844000 | 0.243720000  |
| B  | -1.249632000 | 2.111070000  | -1.242848000 | B  | -2.295162000 | 2.011511000  | -0.724112000 |
| B  | 2.031357000  | 1.510246000  | -0.288571000 | B  | -0.575344000 | -0.171363000 | -0.336269000 |
| B  | 1.057912000  | 1.052030000  | 2.374675000  | B  | -0.671424000 | 2.612467000  | -0.582912000 |
| B  | 0.736962000  | 1.967030000  | 1.034749000  | Au | 4.220286000  | -0.658611000 | 0.428928000  |
| 6i |              |              |              | 6j |              |              |              |
| B  | 0.772588000  | 3.130278000  | -1.548736000 | Au | 3.371912000  | -0.246858000 | -0.368727000 |
| Au | -1.358500000 | -0.706758000 | -0.141673000 | B  | -1.618451000 | -0.768141000 | 0.098854000  |
| B  | -0.766144000 | 3.131652000  | -1.548756000 | B  | -0.321495000 | -1.354424000 | 0.939789000  |
| B  | -1.539660000 | 0.562003000  | 1.672074000  | B  | -0.630212000 | 0.385919000  | 0.676810000  |

|           |              |              |              |           |              |              |              |
|-----------|--------------|--------------|--------------|-----------|--------------|--------------|--------------|
| B         | 1.727380000  | 2.421766000  | -0.483688000 | B         | 0.595812000  | 1.474925000  | 0.838827000  |
| B         | 0.001120000  | 0.804665000  | 2.100155000  | B         | -0.712193000 | 1.966390000  | -0.212981000 |
| B         | 0.002891000  | 2.799463000  | -0.112965000 | B         | 0.618040000  | 2.846913000  | -0.019806000 |
| B         | -0.829261000 | 1.965341000  | 1.086158000  | B         | 2.366281000  | -0.654623000 | 1.572486000  |
| B         | -1.722163000 | 2.424836000  | -0.483694000 | B         | 2.436117000  | 0.929588000  | 1.177771000  |
| B         | -2.294128000 | 1.306329000  | 0.519901000  | B         | 1.143385000  | -1.667797000 | 1.512306000  |
| B         | 2.297268000  | 1.302204000  | 0.519884000  | B         | 0.781461000  | -0.098186000 | 1.369289000  |
| B         | 1.541407000  | 0.559099000  | 1.671905000  | B         | -1.814486000 | 0.762107000  | -0.392231000 |
| B         | 0.833598000  | 1.963815000  | 1.086116000  | B         | 1.968106000  | 2.376600000  | 0.604687000  |
| Au        | 1.356925000  | -0.709157000 | -0.141767000 | Au        | -3.676492000 | -0.145501000 | -0.148096000 |
| <b>6k</b> |              |              |              | <b>6l</b> |              |              |              |
| Au        | -2.460274000 | 0.102108000  | 0.023683000  | B         | 5.380312000  | -1.436868000 | 0.266462000  |
| B         | 3.459681000  | 2.619867000  | -0.405778000 | Au        | -1.199120000 | 1.745544000  | 0.144382000  |
| Au        | 1.578256000  | -1.288604000 | 0.203503000  | B         | 3.995533000  | -1.693521000 | 0.909435000  |
| B         | 3.114171000  | 1.958370000  | -1.748552000 | B         | 0.579049000  | 1.146536000  | -0.770590000 |
| B         | -0.881487000 | 0.886983000  | -0.985332000 | Au        | -1.241229000 | -1.793249000 | -0.133312000 |
| B         | 2.543883000  | 2.734846000  | 0.909502000  | B         | 2.122133000  | 1.521796000  | -0.566498000 |
| B         | 1.165566000  | 1.594267000  | 0.908270000  | B         | 5.917507000  | -0.191358000 | -0.448975000 |
| B         | -0.577813000 | 1.365386000  | 0.572105000  | B         | 2.936105000  | 0.798371000  | 0.663921000  |
| B         | 0.754013000  | 0.498323000  | -0.361185000 | B         | 2.728481000  | -0.810606000 | 0.949166000  |
| B         | 1.755746000  | 1.315175000  | -2.196222000 | B         | 1.468402000  | 0.115022000  | 0.341434000  |
| B         | 0.226348000  | 0.951882000  | -2.051067000 | B         | 5.219760000  | 1.154991000  | -0.763360000 |
| B         | 1.325680000  | 2.889500000  | 1.918896000  | B         | -0.119442000 | -0.172991000 | -0.226535000 |
| B         | 2.155599000  | 1.564446000  | -0.457735000 | B         | 3.759368000  | 1.610568000  | -0.536590000 |
| B         | -0.090356000 | 2.296155000  | 1.768634000  | B         | 4.281478000  | -0.091612000 | 0.132505000  |
| <b>6m</b> |              |              |              | <b>6n</b> |              |              |              |
| B         | -2.471790000 | -0.074477000 | 0.909991000  | Au        | 3.677697000  | -0.497161000 | -0.116975000 |
| Au        | 1.342982000  | 0.935428000  | -0.103602000 | B         | 0.847612000  | 3.499861000  | -0.223916000 |
| Au        | 0.213484000  | -1.494685000 | -0.152798000 | B         | 0.520448000  | -0.891544000 | 1.389852000  |
| B         | -0.301288000 | 2.332231000  | 0.790094000  | B         | 2.139013000  | 2.684207000  | 0.043282000  |
| B         | -1.547549000 | 1.301929000  | 1.113639000  | B         | 1.966125000  | -0.351937000 | 1.078980000  |
| B         | -1.625995000 | 2.626613000  | -0.082148000 | B         | -0.650120000 | 2.956663000  | -0.097268000 |
| B         | -1.731532000 | -1.573915000 | 0.971657000  | Au        | -3.833612000 | -0.483605000 | -0.062637000 |
| B         | 0.045855000  | 1.002473000  | 1.591225000  | B         | -2.006057000 | 2.179508000  | 0.348841000  |
| B         | -3.035373000 | -1.429236000 | 0.134504000  | B         | -0.847546000 | -0.230363000 | 0.956520000  |
| B         | -2.869605000 | 2.515240000  | -1.115201000 | B         | 0.732327000  | 1.868914000  | -0.327863000 |
| B         | -3.646124000 | -0.129022000 | -0.560613000 | B         | 0.632696000  | 0.287917000  | 0.250369000  |
| B         | -0.812196000 | -0.369112000 | 1.570748000  | B         | 2.261258000  | 1.123807000  | 0.369023000  |
| B         | -2.810440000 | 1.338437000  | 0.021820000  | B         | -2.274118000 | 0.639028000  | 0.550545000  |
| B         | -3.786130000 | 1.295111000  | -1.294599000 | B         | -0.775321000 | 1.122683000  | -0.097277000 |
| <b>6o</b> |              |              |              | <b>6p</b> |              |              |              |
| B         | -4.499875000 | 1.267552000  | -0.925641000 | Au        | -2.303164000 | 0.515680000  | 0.020720000  |
| B         | -3.341369000 | 0.204561000  | -0.091760000 | B         | 5.427886000  | 1.676632000  | 0.088860000  |
| B         | -3.464005000 | 2.093496000  | -0.113690000 | Au        | -0.049672000 | -1.056749000 | -0.035545000 |
| Au        | -0.325530000 | -0.847871000 | 0.130313000  | B         | 6.092782000  | 0.274577000  | -0.075909000 |
| B         | -0.948256000 | 1.234705000  | 0.736864000  | B         | -0.455457000 | 1.308393000  | 0.005637000  |
| B         | -4.550422000 | -0.230217000 | -1.274186000 | B         | 3.838077000  | 1.974403000  | -0.014631000 |
| B         | -2.596999000 | 1.316815000  | 1.094570000  | B         | 2.031190000  | -0.856518000 | 0.106572000  |
| B         | 0.626214000  | 1.453052000  | 0.197729000  | B         | 5.220351000  | -0.981576000 | 0.153173000  |
| B         | -3.689251000 | -1.391453000 | -0.772589000 | B         | 1.191882000  | 0.736590000  | 0.095615000  |
| B         | -2.147462000 | -0.191969000 | 1.223466000  | B         | 4.437783000  | 0.403561000  | -0.325451000 |

|           |              |              |              |           |              |              |              |
|-----------|--------------|--------------|--------------|-----------|--------------|--------------|--------------|
| B         | -0.322162000 | 2.639334000  | 0.034373000  | B         | 0.672386000  | 2.298413000  | -0.149186000 |
| B         | -2.565131000 | -1.391015000 | 0.303126000  | B         | 2.258923000  | 2.204046000  | -0.085648000 |
| B         | -1.900655000 | 2.526492000  | 0.148683000  | B         | 3.587690000  | -1.036477000 | 0.172247000  |
| Au        | 2.186250000  | 0.244621000  | -0.165816000 | B         | 2.871318000  | 0.546852000  | 0.262962000  |
| <b>6q</b> |              |              |              | <b>6r</b> |              |              |              |
| B         | -4.006495000 | 3.636452000  | 0.000000000  | B         | -5.020707000 | -0.944342000 | 0.003338000  |
| Au        | 3.447499000  | 0.193142000  | 0.000000000  | Au        | 2.256931000  | -0.039617000 | -0.001226000 |
| B         | -2.845301000 | 4.656157000  | 0.000000000  | B         | -3.794877000 | -1.878438000 | 0.003257000  |
| B         | 1.569459000  | 0.727841000  | 0.000000000  | B         | -1.050104000 | 3.406566000  | -0.000949000 |
| B         | -3.943813000 | 2.106201000  | 0.000000000  | B         | -5.005500000 | 0.623003000  | 0.002207000  |
| Au        | -2.300448000 | -1.899954000 | 0.000000000  | B         | -2.358745000 | 2.469287000  | 0.000211000  |
| B         | -1.344319000 | 4.444441000  | 0.000000000  | B         | -3.516326000 | -0.208426000 | 0.002135000  |
| B         | 0.000000000  | 0.363826000  | 0.000000000  | B         | 0.415222000  | 2.924263000  | -0.001348000 |
| B         | -2.378570000 | 2.950610000  | 0.000000000  | B         | -3.685788000 | 1.535780000  | 0.001169000  |
| B         | 0.548588000  | 2.013411000  | 0.000000000  | B         | -0.769730000 | 1.752185000  | -0.000553000 |
| B         | -2.747581000 | 1.146614000  | 0.000000000  | B         | -2.242127000 | -1.645171000 | 0.002199000  |
| B         | -1.612712000 | -0.028759000 | 0.000000000  | B         | 0.905348000  | 1.443598000  | -0.000862000 |
| B         | -0.252751000 | 3.361061000  | 0.000000000  | B         | -2.198509000 | 0.819966000  | 0.001061000  |
| B         | -1.109902000 | 1.589781000  | 0.000000000  | Au        | -0.510690000 | -0.555829000 | 0.000766000  |
| <b>6s</b> |              |              |              |           |              |              |              |
| Au        | -2.296434000 | 0.539295000  | -0.000731000 |           |              |              |              |
| B         | 5.437795000  | 1.748686000  | 0.038106000  |           |              |              |              |
| Au        | -0.056358000 | -1.085919000 | 0.004812000  |           |              |              |              |
| B         | 6.071244000  | 0.303872000  | 0.037770000  |           |              |              |              |
| B         | -0.436394000 | 1.295237000  | -0.002832000 |           |              |              |              |
| B         | 3.858620000  | 2.042405000  | 0.000672000  |           |              |              |              |
| B         | 2.007782000  | -0.910818000 | -0.028837000 |           |              |              |              |
| B         | 5.215842000  | -1.022794000 | 0.028403000  |           |              |              |              |
| B         | 1.216138000  | 0.729639000  | -0.036620000 |           |              |              |              |
| B         | 4.451861000  | 0.440765000  | -0.097857000 |           |              |              |              |
| B         | 0.681589000  | 2.336879000  | 0.018642000  |           |              |              |              |
| B         | 2.249478000  | 2.221471000  | 0.009491000  |           |              |              |              |
| B         | 3.582678000  | -1.057504000 | -0.023587000 |           |              |              |              |
| B         | 2.837478000  | 0.508820000  | -0.007827000 |           |              |              |              |

|           |              |              |             |           |              |              |              |
|-----------|--------------|--------------|-------------|-----------|--------------|--------------|--------------|
| <b>7a</b> |              |              |             | <b>7b</b> |              |              |              |
| B         | 0.494681000  | 2.093433000  | 0.000000000 | B         | -1.377584000 | -2.226339000 | 0.857032000  |
| B         | 3.225176000  | -3.837074000 | 0.000000000 | B         | 1.635276000  | 0.780121000  | -0.712163000 |
| B         | 2.007667000  | 1.795795000  | 0.000000000 | B         | -2.494914000 | -1.035897000 | 0.955559000  |
| B         | 1.642271000  | -3.827936000 | 0.000000000 | B         | 0.678759000  | 2.023098000  | -1.006233000 |
| B         | 0.956792000  | 0.459764000  | 0.000000000 | B         | -3.213476000 | 0.243194000  | 0.230112000  |
| B         | 4.111398000  | -2.521087000 | 0.000000000 | Cu        | 2.953514000  | -0.495349000 | 0.005217000  |
| Cu        | -1.098807000 | 3.227201000  | 0.000000000 | B         | -2.298639000 | 1.375414000  | -0.347801000 |
| B         | 2.474106000  | -2.400330000 | 0.000000000 | B         | 0.892055000  | -0.749203000 | -0.516257000 |
| B         | 2.740626000  | 0.399247000  | 0.000000000 | Cu        | -1.448809000 | -0.707555000 | -0.895700000 |
| Cu        | -1.856978000 | -1.645318000 | 0.000000000 | B         | -0.894409000 | 1.894332000  | -0.985896000 |
| B         | 0.000000000  | -1.029862000 | 0.000000000 | B         | -1.854857000 | 0.536584000  | 1.108914000  |
| B         | 3.524903000  | -1.037501000 | 0.000000000 | B         | 0.158451000  | 0.498828000  | -1.382286000 |
| B         | 1.642652000  | -1.011975000 | 0.000000000 | B         | 0.047829000  | -1.827547000 | 0.381404000  |
| B         | 0.754216000  | -2.475882000 | 0.000000000 | Cu        | 0.146399000  | 1.071070000  | 0.895373000  |
| Cu        | -1.108782000 | 0.727326000  | 0.000000000 | B         | -0.854893000 | -0.747949000 | 1.389252000  |

| 7c |              |              |              | 7d |              |              |              |
|----|--------------|--------------|--------------|----|--------------|--------------|--------------|
| Cu | -4.980086000 | -0.702180000 | 0.193573000  | B  | -0.485798000 | -0.819303000 | 1.586880000  |
| B  | 1.828636000  | 2.135293000  | 0.117449000  | B  | 0.944827000  | 0.012667000  | -1.632526000 |
| B  | -3.055330000 | -0.555189000 | -0.329877000 | B  | -0.485798000 | -0.819303000 | -1.586880000 |
| B  | 2.748383000  | 0.923991000  | 0.096149000  | B  | 0.944827000  | 0.012667000  | 1.632526000  |
| B  | -3.776761000 | 0.887291000  | -0.164850000 | B  | -0.508222000 | 0.805374000  | -1.587254000 |
| B  | 0.242614000  | 2.247626000  | 0.019894000  | B  | -0.508222000 | 0.805374000  | 1.587254000  |
| B  | -1.449814000 | -0.781015000 | -0.286434000 | B  | 0.867927000  | 1.489604000  | 0.806571000  |
| Cu | 4.425479000  | -0.074309000 | 0.159731000  | B  | -1.753906000 | -0.023780000 | -0.794532000 |
| Cu | 2.163680000  | -1.083571000 | -0.120419000 | B  | -1.753906000 | -0.023780000 | 0.794532000  |
| B  | 1.081875000  | 0.652933000  | -0.060852000 | B  | 0.867927000  | 1.489604000  | -0.806571000 |
| B  | -2.179846000 | 0.775518000  | 0.070336000  | B  | 0.908767000  | -1.465209000 | 0.806502000  |
| B  | -1.362044000 | 2.288759000  | -0.088696000 | B  | 0.908767000  | -1.465209000 | -0.806502000 |
| B  | 0.122405000  | -0.771847000 | -0.258319000 | Cu | -1.137023000 | 1.950573000  | 0.000000000  |
| B  | -0.582973000 | 0.742520000  | -0.325489000 | Cu | 2.229729000  | 0.031135000  | 0.000000000  |
| B  | -2.949770000 | 2.242473000  | -0.140043000 | Cu | -1.083602000 | -1.981485000 | 0.000000000  |
| 7e |              |              |              | 7f |              |              |              |
| B  | -2.640425000 | -1.555146000 | -0.153113000 | B  | -2.322134000 | -2.293446000 | -0.653195000 |
| Cu | 2.497684000  | 1.479994000  | 0.109144000  | B  | 0.196853000  | -2.434186000 | 0.542696000  |
| B  | -3.997477000 | -1.179850000 | 0.624274000  | B  | -2.611186000 | -0.736811000 | -0.748758000 |
| B  | -0.562623000 | 0.618080000  | -0.591203000 | Cu | -1.258085000 | 0.620491000  | 0.690195000  |
| B  | -3.719340000 | 1.593707000  | 0.361426000  | B  | -1.880069000 | 2.173780000  | -0.668462000 |
| B  | -1.835284000 | -0.402683000 | -0.980634000 | B  | -1.374231000 | -1.488098000 | 0.439240000  |
| B  | -2.530478000 | 2.618917000  | 0.113078000  | B  | 1.462335000  | -1.466575000 | 0.814750000  |
| Cu | 2.166429000  | -1.301437000 | 0.100046000  | B  | 0.016702000  | -0.878049000 | 1.164286000  |
| B  | -4.510913000 | 0.278009000  | 0.798933000  | B  | -0.463786000 | 2.510134000  | -0.078750000 |
| B  | 0.508031000  | 1.742192000  | -0.025707000 | B  | 0.714956000  | 1.629261000  | 0.405031000  |
| Cu | -0.395940000 | -1.459924000 | -0.046185000 | B  | 1.234920000  | 0.177492000  | 0.829023000  |
| B  | 0.942845000  | 0.212351000  | -0.057877000 | B  | -2.608340000 | 0.831633000  | -0.966544000 |
| B  | -2.176846000 | 1.201845000  | -0.717116000 | B  | -1.125683000 | -3.062196000 | -0.104314000 |
| B  | -3.227750000 | -0.001045000 | -0.196330000 | Cu | 3.219046000  | -0.666196000 | 0.569973000  |
| B  | -1.005146000 | 2.305553000  | -0.121160000 | Cu | -0.379562000 | 1.003547000  | -1.624275000 |
| 7g |              |              |              | 7h |              |              |              |
| B  | -0.240388000 | 0.740252000  | -1.336406000 | B  | -2.344313000 | 0.878834000  | 0.163786000  |
| B  | -2.030523000 | -1.287988000 | 1.050853000  | B  | -0.183449000 | 0.090519000  | 1.900845000  |
| Cu | 2.883852000  | -0.093020000 | -0.079323000 | B  | -0.950903000 | -0.618334000 | -1.571284000 |
| B  | -0.921258000 | -2.410186000 | 0.962391000  | B  | -1.338440000 | 1.114898000  | 1.374183000  |
| B  | 1.192279000  | 1.001584000  | -0.457789000 | B  | 0.142722000  | 1.793516000  | 1.312343000  |
| B  | -2.607740000 | 1.556074000  | -0.079790000 | B  | 2.444301000  | 1.308383000  | -0.214347000 |
| B  | -1.847427000 | 0.465783000  | -1.056336000 | B  | 2.809582000  | -0.184240000 | 0.006764000  |
| B  | -2.671670000 | 0.071946000  | 0.442832000  | B  | -2.252813000 | 0.156226000  | -1.216327000 |
| B  | 0.336346000  | 2.242746000  | -0.862592000 | B  | 1.406674000  | 2.170204000  | 0.506108000  |
| B  | -0.347054000 | -0.907725000 | 1.383287000  | B  | 1.446425000  | 0.446215000  | 1.003302000  |
| B  | -1.282926000 | 2.066311000  | -0.866954000 | Cu | -1.306165000 | -0.995169000 | 0.513971000  |
| Cu | -0.603080000 | 1.093644000  | 0.930049000  | B  | 0.839593000  | -1.089252000 | 1.717603000  |
| B  | 0.959025000  | -0.503857000 | 0.340028000  | B  | 2.165984000  | -1.208360000 | 0.962152000  |
| B  | 0.556881000  | -2.045262000 | 0.557553000  | Cu | 0.869295000  | -1.065185000 | -0.837177000 |
| Cu | -0.819180000 | -1.314536000 | -0.925463000 | Cu | -0.304757000 | 1.260029000  | -0.752782000 |
| 7i |              |              |              | 7j |              |              |              |

|           |              |              |              |    |              |              |              |
|-----------|--------------|--------------|--------------|----|--------------|--------------|--------------|
| Cu        | 2.335026000  | -1.676405000 | 0.664189000  | Cu | -1.222286000 | -0.725057000 | -0.849910000 |
| Cu        | -3.892431000 | -1.375591000 | -0.211109000 | Cu | 2.575438000  | -0.275850000 | -0.086475000 |
| Cu        | 3.163616000  | 0.249439000  | -0.630369000 | B  | -3.071232000 | 0.520445000  | -0.408747000 |
| B         | -3.046108000 | 0.397896000  | -0.019355000 | B  | 0.750051000  | -1.497362000 | -0.329885000 |
| B         | 1.253749000  | -0.176528000 | -0.175944000 | B  | -2.857616000 | -0.481509000 | 0.767448000  |
| B         | -2.712503000 | 1.963039000  | 0.316519000  | B  | 0.922791000  | -0.095076000 | -1.150864000 |
| B         | -2.059153000 | 3.398074000  | 0.400597000  | B  | -1.933616000 | 0.973406000  | 0.822526000  |
| B         | 1.621178000  | 1.508502000  | -0.298977000 | B  | -0.275475000 | -1.971644000 | 0.721917000  |
| B         | -1.441237000 | 0.644549000  | 0.259428000  | B  | -1.853049000 | 1.409210000  | -0.877354000 |
| B         | -0.332359000 | -0.497623000 | -0.419103000 | B  | 1.492584000  | 1.414455000  | -0.822571000 |
| B         | 0.689546000  | 2.723269000  | 0.153611000  | B  | -1.693795000 | -1.481586000 | 1.177273000  |
| B         | -0.544645000 | 3.741137000  | 0.295910000  | B  | -0.198163000 | 1.301625000  | -1.031478000 |
| B         | -1.950733000 | -0.652610000 | -0.533719000 | B  | -0.828367000 | 2.094793000  | 0.516946000  |
| B         | 0.193224000  | 1.012316000  | 0.355483000  | Cu | 0.184506000  | 0.207820000  | 1.039533000  |
| B         | -0.986982000 | 2.192809000  | 0.693827000  | B  | 0.627469000  | 2.413145000  | 0.016529000  |
| <b>7k</b> |              |              |              |    |              |              |              |
| B         | 1.142305000  | -1.186331000 | -0.162745000 |    |              |              |              |
| B         | -0.492110000 | -1.015349000 | 0.616803000  |    |              |              |              |
| Cu        | -2.686375000 | -0.603005000 | 0.457589000  |    |              |              |              |
| Cu        | 0.959796000  | 0.877318000  | 0.156298000  |    |              |              |              |
| B         | 0.039237000  | -2.266559000 | -0.487031000 |    |              |              |              |
| B         | -0.822506000 | 0.802068000  | -1.955496000 |    |              |              |              |
| Cu        | 2.991875000  | -0.604419000 | 0.162745000  |    |              |              |              |
| B         | -0.401537000 | 2.233146000  | -1.422558000 |    |              |              |              |
| B         | -0.467454000 | 2.760499000  | 0.024124000  |    |              |              |              |
| B         | -1.155921000 | 1.149747000  | -0.258217000 |    |              |              |              |
| B         | -0.819341000 | 1.910976000  | 1.279896000  |    |              |              |              |
| B         | -0.138005000 | -0.700176000 | -1.253797000 |    |              |              |              |
| B         | -1.787920000 | -0.356578000 | -1.487370000 |    |              |              |              |
| B         | -1.420821000 | -1.780925000 | -0.749254000 |    |              |              |              |
| B         | -1.014646000 | 0.364097000  | 1.351179000  |    |              |              |              |

|           |              |              |             |           |              |              |              |
|-----------|--------------|--------------|-------------|-----------|--------------|--------------|--------------|
| <b>8a</b> |              |              |             | <b>8b</b> |              |              |              |
| B         | -2.099833000 | 0.132577000  | 0.000000000 | B         | -3.128095000 | -0.916937000 | 0.135560000  |
| B         | 1.650051000  | -5.236188000 | 0.000000000 | B         | 1.113980000  | -0.048638000 | 0.128106000  |
| B         | -2.568093000 | -1.324306000 | 0.000000000 | B         | -2.733596000 | -2.366651000 | -0.503192000 |
| B         | 2.453973000  | -3.875994000 | 0.000000000 | Ag        | 2.105497000  | 1.680153000  | -0.736255000 |
| B         | -0.880083000 | -1.069821000 | 0.000000000 | Ag        | -4.241143000 | 0.919438000  | 0.282983000  |
| B         | 0.066474000  | -5.323286000 | 0.000000000 | Ag        | 3.194825000  | -0.466762000 | 0.778656000  |
| Ag        | -2.565628000 | 2.183145000  | 0.000000000 | B         | -2.003517000 | -3.724485000 | -0.839270000 |
| B         | 0.800687000  | -3.854553000 | 0.000000000 | B         | 1.574905000  | -1.706935000 | 0.001952000  |
| B         | -1.727162000 | -2.652628000 | 0.000000000 | B         | -1.539092000 | -0.978038000 | -0.321989000 |
| Ag        | 2.620452000  | 0.263362000  | 0.000000000 | B         | -0.473396000 | 0.110754000  | 0.506480000  |
| B         | 0.906887000  | -1.023479000 | 0.000000000 | B         | 0.700075000  | -2.913466000 | -0.571516000 |
| B         | -0.907441000 | -4.064606000 | 0.000000000 | B         | -0.470505000 | -3.980378000 | -0.824723000 |
| B         | 0.043227000  | -2.411196000 | 0.000000000 | B         | -2.082181000 | 0.122978000  | 0.722096000  |
| B         | 1.745967000  | -2.421734000 | 0.000000000 | B         | 0.098688000  | -1.226388000 | -0.505323000 |
| Ag        | 0.000000000  | 1.077452000  | 0.000000000 | B         | -1.013543000 | -2.420412000 | -0.986793000 |



| 8c |              |              |              | 8d |              |              |              |
|----|--------------|--------------|--------------|----|--------------|--------------|--------------|
| Ag | 5.354324000  | -0.490105000 | -0.000167000 | B  | 3.298462000  | -0.894975000 | 0.773049000  |
| B  | -1.708373000 | 2.366170000  | -0.000500000 | Ag | -2.249640000 | 1.749561000  | 0.309061000  |
| B  | 3.249429000  | -0.254212000 | 0.000613000  | B  | 4.724594000  | -0.457775000 | 0.171833000  |
| B  | -2.624775000 | 1.144878000  | -0.000499000 | B  | 0.786108000  | 0.922486000  | 0.251718000  |
| B  | 3.904916000  | 1.283511000  | 0.000036000  | B  | 3.931008000  | 2.117720000  | -0.615554000 |
| B  | -0.126204000 | 2.468229000  | 0.000074000  | B  | 2.107062000  | 0.209591000  | 0.930288000  |
| B  | 1.640064000  | -0.523506000 | 0.000674000  | B  | 2.594261000  | 2.917169000  | -0.959358000 |
| Ag | -4.492424000 | 0.200497000  | -0.000024000 | Ag | -1.769745000 | -1.567433000 | -0.321257000 |
| Ag | -2.036177000 | -1.197836000 | -0.000034000 | B  | 5.015440000  | 0.956120000  | -0.419759000 |
| B  | -0.927096000 | 0.858086000  | 0.000059000  | B  | -0.332489000 | 1.664427000  | -0.821472000 |
| B  | 2.339753000  | 1.102872000  | 0.000117000  | Ag | 0.994641000  | -1.509504000 | 0.149292000  |
| B  | 1.473652000  | 2.681188000  | 0.000009000  | B  | -0.676269000 | 0.232897000  | -0.329087000 |
| B  | 0.064547000  | -0.624462000 | 0.000642000  | B  | 2.293112000  | 1.684176000  | 0.120132000  |
| B  | 0.699405000  | 0.883176000  | 0.000696000  | B  | 3.598618000  | 0.690016000  | 0.377140000  |
| B  | 3.052889000  | 2.596037000  | 0.000198000  | B  | 1.092688000  | 2.435474000  | -0.767635000 |
| 8e |              |              |              | 8f |              |              |              |
| Ag | -2.594138000 | 1.857208000  | 0.011194000  | B  | 0.494651000  | -0.952891000 | -0.196235000 |
| Ag | 4.332587000  | 0.311639000  | -0.227524000 | B  | -0.719664000 | -0.667945000 | 0.853560000  |
| Ag | -2.473509000 | -1.741062000 | -0.313808000 | Ag | -2.896880000 | -0.920469000 | -0.167247000 |
| B  | 1.434482000  | -0.357725000 | 0.877801000  | Ag | 1.656501000  | 1.198546000  | -0.495169000 |
| B  | -1.187428000 | 0.185155000  | -0.582802000 | B  | -0.561965000 | -1.069234000 | -1.363826000 |
| B  | -0.993381000 | -0.324482000 | 2.292879000  | B  | -0.660218000 | 2.284809000  | -0.642778000 |
| B  | -1.837886000 | -0.042251000 | 0.983101000  | Ag | 2.502732000  | -1.319129000 | 0.391331000  |
| B  | -0.161758000 | 0.085983000  | 0.969157000  | B  | -0.707248000 | 3.033112000  | 0.738994000  |
| B  | -0.223166000 | 0.011770000  | -1.864708000 | B  | -1.320920000 | 2.652101000  | 2.093003000  |
| B  | 2.151229000  | -1.023845000 | 2.173195000  | B  | -1.130822000 | 1.337703000  | 0.991169000  |
| B  | 1.284510000  | -0.380845000 | -1.897466000 | B  | -1.913968000 | 1.292351000  | 2.523530000  |
| B  | 0.581230000  | -0.632572000 | 2.390578000  | B  | -0.492492000 | 0.545240000  | -0.609336000 |
| B  | 0.645135000  | 0.166804000  | -0.495423000 | B  | -1.451941000 | 1.479091000  | -1.770936000 |
| B  | 2.914273000  | -1.060662000 | 0.806867000  | B  | -1.626741000 | -0.059594000 | -1.927324000 |
| B  | 2.302324000  | -0.648512000 | -0.669874000 | B  | -1.774791000 | -0.088864000 | 1.858377000  |
| 8g |              |              |              |    |              |              |              |
| Ag | 1.825116000  | 1.402244000  | -0.520643000 |    |              |              |              |
| B  | -3.753457000 | 2.572188000  | -0.416073000 |    |              |              |              |
| B  | 0.589179000  | -0.338926000 | 0.907484000  |    |              |              |              |
| Ag | -2.086590000 | -2.156014000 | -0.336495000 |    |              |              |              |
| B  | 0.230026000  | 2.771632000  | 0.146908000  |    |              |              |              |
| B  | -3.387716000 | 1.115308000  | 0.166398000  |    |              |              |              |
| Ag | 2.294658000  | -1.366480000 | 0.280391000  |    |              |              |              |
| B  | -2.738261000 | 3.732158000  | -0.504214000 |    |              |              |              |
| B  | 0.094979000  | 1.208009000  | 0.950811000  |    |              |              |              |
| B  | -2.619244000 | -0.251427000 | 0.462420000  |    |              |              |              |
| B  | -1.002075000 | -0.429015000 | 0.777718000  |    |              |              |              |
| B  | -2.495616000 | 2.547669000  | 0.613688000  |    |              |              |              |
| B  | -1.198477000 | 3.572891000  | 0.003417000  |    |              |              |              |
| B  | -1.875843000 | 1.023219000  | 1.105284000  |    |              |              |              |
| B  | -0.955419000 | 2.406631000  | 1.207576000  |    |              |              |              |

| 9a |              |              |              | 9b |              |              |              |
|----|--------------|--------------|--------------|----|--------------|--------------|--------------|
| B  | 1.466282000  | 1.546842000  | -0.066689000 | Au | -5.082855000 | -0.068663000 | -0.121032000 |
| B  | -4.911091000 | 3.195351000  | 0.125464000  | B  | 1.756776000  | 2.973400000  | -0.228598000 |
| B  | 0.829539000  | 2.937356000  | -0.182036000 | B  | -3.025563000 | 0.057722000  | -0.261355000 |
| B  | -4.657896000 | 1.643296000  | 0.225375000  | B  | 2.738262000  | 1.799654000  | -0.106186000 |
| B  | -0.282833000 | 1.653462000  | -0.036665000 | B  | -3.793473000 | 1.589130000  | -0.368159000 |
| B  | -3.757304000 | 4.258581000  | -0.075799000 | B  | 0.180359000  | 2.909880000  | -0.292981000 |
| Au | 3.055376000  | 0.291198000  | 0.005470000  | B  | -1.440322000 | -0.093945000 | -0.163312000 |
| B  | -3.364424000 | 2.673036000  | 0.117755000  | Au | 4.283321000  | 0.599024000  | 0.045906000  |
| B  | -0.668925000 | 3.383527000  | -0.178929000 | Au | 1.383815000  | -1.726378000 | -0.061506000 |
| Au | -1.933020000 | -1.679905000 | -0.050860000 | B  | 1.059359000  | 1.408589000  | -0.160290000 |
| B  | -1.670342000 | 0.397026000  | 0.063356000  | B  | -2.210847000 | 1.466635000  | -0.228946000 |
| B  | -2.209762000 | 3.911728000  | -0.151708000 | B  | -1.439419000 | 3.087982000  | -0.345910000 |
| B  | -1.876203000 | 2.031229000  | -0.061287000 | B  | 0.189372000  | -0.132326000 | -0.115551000 |
| B  | -3.188637000 | 0.976100000  | 0.181832000  | B  | -0.551423000 | 1.327350000  | -0.216569000 |
| Au | 0.415087000  | -0.421897000 | 0.047879000  | B  | -2.986937000 | 2.938637000  | -0.391507000 |
| 9c |              |              |              | 9d |              |              |              |
| B  | -3.105774000 | 1.234270000  | 0.255788000  | B  | -3.311599000 | 1.074379000  | -0.532680000 |
| B  | 1.060093000  | -0.060787000 | 0.090520000  | Au | 2.937059000  | 0.674428000  | -0.272892000 |
| B  | -2.610886000 | 2.406380000  | 1.273004000  | B  | -4.244458000 | 2.323558000  | -0.128847000 |
| Au | 1.920896000  | -1.823267000 | 0.605548000  | B  | -0.025620000 | 1.465668000  | -0.174637000 |
| Au | -4.223753000 | -0.403144000 | -0.402920000 | B  | -2.152804000 | 4.073477000  | 0.667090000  |
| Au | 2.881428000  | 0.987416000  | -0.847805000 | B  | -1.586240000 | 1.339464000  | -0.576780000 |
| B  | -1.781105000 | 3.560974000  | 1.963651000  | B  | -0.590983000 | 4.114161000  | 0.990162000  |
| B  | 1.670350000  | 1.524111000  | 0.685962000  | Au | 0.313865000  | -1.768967000 | 0.359471000  |
| B  | -1.524170000 | 1.019860000  | 0.699633000  | B  | -3.689730000 | 3.671903000  | 0.408088000  |
| B  | -0.546716000 | 0.055151000  | -0.329271000 | B  | 1.371480000  | 1.578126000  | 0.846178000  |
| B  | 0.842345000  | 2.625054000  | 1.496951000  | Au | -2.207295000 | -0.678513000 | -0.256459000 |
| B  | -0.235551000 | 3.689434000  | 2.019390000  | B  | 0.932905000  | 0.142568000  | 0.372847000  |
| B  | -2.142886000 | 0.223027000  | -0.565387000 | B  | -1.048130000 | 2.720717000  | 0.220740000  |
| B  | 0.119594000  | 1.094490000  | 0.896458000  | B  | -2.637837000 | 2.561870000  | -0.212194000 |
| B  | -0.886714000 | 2.204161000  | 1.707092000  | B  | 0.493676000  | 2.948332000  | 0.804136000  |
| 9e |              |              |              | 9f |              |              |              |
| Au | -2.429031000 | 1.684188000  | -0.007511000 | B  | -0.096096000 | 0.146914000  | 0.413146000  |
| Au | 4.434835000  | 0.149822000  | -0.166056000 | B  | 1.811546000  | 0.719327000  | 0.234148000  |
| Au | -2.529360000 | -1.559145000 | -0.197517000 | B  | 0.419692000  | 1.783787000  | 0.269604000  |
| B  | 1.544882000  | -0.362503000 | 0.952860000  | Au | 1.347134000  | -0.910077000 | 1.541495000  |
| B  | -1.050754000 | 0.114696000  | -0.593631000 | B  | -2.813155000 | 1.119592000  | 0.269481000  |
| B  | -0.895275000 | -0.289639000 | 2.377213000  | Au | 2.707066000  | -0.054462000 | -1.409491000 |
| B  | -1.790855000 | -0.065051000 | 1.088295000  | B  | -0.376609000 | 4.412575000  | 1.042018000  |
| B  | -0.094489000 | 0.008900000  | 0.991828000  | B  | -1.710360000 | -0.080747000 | 0.312784000  |
| B  | -0.056490000 | -0.113011000 | -1.853541000 | B  | -1.876961000 | 4.111455000  | 0.795325000  |
| B  | 2.246016000  | -0.935359000 | 2.306485000  | B  | -2.519315000 | 2.708908000  | 0.450624000  |
| B  | 1.442825000  | -0.507368000 | -1.826407000 | Au | -3.654835000 | -0.616540000 | -0.506542000 |
| B  | 0.665574000  | -0.592188000 | 2.469273000  | B  | -1.187342000 | 1.425298000  | 0.106146000  |
| B  | 0.752353000  | 0.065832000  | -0.452527000 | B  | 0.890233000  | 3.404730000  | 0.898885000  |
| B  | 3.057081000  | -1.002362000 | 0.969709000  | B  | 1.922141000  | 2.218883000  | 0.830031000  |
| B  | 2.451324000  | -0.664817000 | -0.566416000 | B  | -0.773740000 | 3.010326000  | 0.295520000  |
| 9g |              |              |              | 9h |              |              |              |

|    |              |              |              |    |              |              |              |
|----|--------------|--------------|--------------|----|--------------|--------------|--------------|
| Au | 3.495253000  | 0.424037000  | -0.375557000 | B  | 2.444971000  | 1.078091000  | 0.109817000  |
| B  | -0.512508000 | 4.639507000  | 0.195516000  | Au | -5.381126000 | -0.309308000 | 0.043387000  |
| B  | -0.320539000 | -0.767634000 | 0.610806000  | B  | 1.755543000  | 2.501143000  | -0.011084000 |
| Au | -3.378538000 | 0.579324000  | -0.385938000 | B  | -3.515593000 | 0.271411000  | -0.092329000 |
| B  | 2.083136000  | 1.507772000  | 0.477623000  | Au | 4.152674000  | 0.016378000  | 0.067625000  |
| B  | -1.501279000 | 3.397480000  | 0.487358000  | B  | -1.948971000 | -0.068018000 | 0.041463000  |
| Au | -0.113744000 | -2.697205000 | 0.240178000  | B  | 0.967661000  | 3.917994000  | -0.156262000 |
| B  | 1.030646000  | 4.555582000  | 0.266139000  | B  | -0.344979000 | -0.294027000 | -0.162592000 |
| B  | 0.601672000  | 0.540577000  | 0.865826000  | B  | -0.574978000 | 4.101867000  | -0.104570000 |
| B  | -2.179760000 | 1.949333000  | 0.503755000  | B  | -2.567303000 | 1.598417000  | -0.258977000 |
| B  | -1.365873000 | 0.436285000  | 0.594307000  | B  | 0.046476000  | 2.620943000  | 0.201642000  |
| B  | 0.136481000  | 3.409206000  | 1.031374000  | B  | -0.926848000 | 1.256728000  | 0.036254000  |
| B  | 1.785237000  | 3.168992000  | 0.605603000  | B  | 0.749908000  | 1.062172000  | -0.067545000 |
| B  | -0.714640000 | 1.920391000  | 1.150953000  | Au | 1.581064000  | -1.035854000 | -0.076879000 |
| B  | 0.910484000  | 2.005231000  | 1.447548000  | B  | -1.657152000 | 2.948067000  | -0.075131000 |
